# Supplementary material for: Case definitions for chronic fatigue syndrome/myalgic encephalomyelitis (CFS/ME): a systematic review
Source: PubMed Central journal article supplement — BMJ Open. 2014 Feb 7;4(2):e003973. doi: 10.1136/bmjopen-2013-003973 (PMC3918975; doi:10.1136/bmjopen-2013-003973), 2014-02-07
Supplement: bmjopen-2013-003973.draft_revisions.pdf [file bmjopen-2013-003973.draft_revisions.pdf]

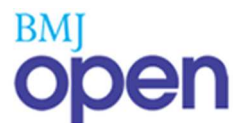

**Case definitions for Chronic Fatigue Syndrome/Myalgic Encephalomyelitis (CFS/ME) - A systematic review**

|                                 |                                                                                                                                                                                                                                                                                                                                                                                                         |
|---------------------------------|---------------------------------------------------------------------------------------------------------------------------------------------------------------------------------------------------------------------------------------------------------------------------------------------------------------------------------------------------------------------------------------------------------|
| Journal:                        | <i>BMJ Open</i>                                                                                                                                                                                                                                                                                                                                                                                         |
| Manuscript ID:                  | bmjopen-2013-003973                                                                                                                                                                                                                                                                                                                                                                                     |
| Article Type:                   | Research                                                                                                                                                                                                                                                                                                                                                                                                |
| Date Submitted by the Author:   | 07-Sep-2013                                                                                                                                                                                                                                                                                                                                                                                             |
| Complete List of Authors:       | Brurberg, Kjetil; Norwegian Knowledge Centre for the Health Services, Primary Health Unit<br>Fønhus, Marita; Norwegian Knowledge Centre for the Health Services, Larun, Lillebeth; Norwegian Knowledge Centre for the Health Services, Flottorp, Signe; Norwegian Knowledge Centre for the Health Services, Malterud, Kirsti; University of Bergen, Department of Global Public Health and Primary Care |
| <b>Primary Subject Heading</b>: | Diagnostics                                                                                                                                                                                                                                                                                                                                                                                             |
| Secondary Subject Heading:      | Epidemiology, Evidence based practice                                                                                                                                                                                                                                                                                                                                                                   |
| Keywords:                       | EPIDEMIOLGY, PRIMARY CARE, STATISTICS & RESEARCH METHODS                                                                                                                                                                                                                                                                                                                                                |
|                                 |                                                                                                                                                                                                                                                                                                                                                                                                         |

SCHOLARONE™  
Manuscripts

1  
2  
3  
4  
5  
6 **Case definitions for Chronic Fatigue Syndrome/Myalgic Encephalomyelitis**  
7 **(CFS/ME) - A systematic review**  
8  
9

10  
11 Kjetil Gundro Brurberg PhD <sup>1</sup>, Marita Sporstøl Fønhus PhD <sup>1</sup>, Lillebeth Larun PT PhD <sup>1</sup>,  
12 Signe Flottorp MD PhD <sup>1,2</sup>, Kirsti Malterud MD PhD <sup>3,4,5</sup>  
13  
14  
15

16  
17  
18 <sup>1</sup> Norwegian Knowledge Centre for the Health Services, NO-0130 Oslo, Norway  
19

20  
21 <sup>2</sup> Institute of Health and Society, University of Oslo, NO-0318 Oslo, Norway  
22

23 <sup>3</sup> Department of Global Public Health and Primary Care, University of Bergen, NO-5020  
24 Bergen, Norway  
25

26  
27 <sup>4</sup> Research Unit for General Practice, Uni Health, Uni Research, NO-5008 Bergen,  
28 Norway  
29

30  
31 <sup>5</sup> Research Unit for General Practice in Copenhagen, DK-1014 Copenhagen K, Denmark  
32  
33  
34  
35

36 **Correspondence to:** KG Brurberg kgb@kunnskapsenteret.no  
37  
38  
39

40 **Word count:** 4010 (excluding title page, abstract, references, tables and figures)  
41

42 **Numbers of tables and numbers of figures:** 4 tables and 5 figures  
43  
44

45 **Keywords:** Fatigue syndrome, diagnosis  
46  
47  
48  
49  
50  
51  
52  
53  
54  
55  
56  
57  
58  
59  
60

## Abstract

**Objective** To identify case definitions for Chronic Fatigue Syndrome/Myalgic Encephalitis (CFS/ME) and explore how one can evaluate the validity of case definitions in the absence of a reference standard.

**Design** Systematic review.

**Data sources and eligibility criteria** The Cochrane Library, Ovid AMED, Ovid MEDLINE In-Process & Other Non-Indexed Citations, Ovid MEDLINE, Ovid EMBASE, CINAHL, Ovid PsycINFO, and PEDRO databases, and reference lists were searched for studies presenting or validating case definitions for CFS/ME for adult populations.

**Review methods** We searched for relevant case definitions and validation studies. Potential validation studies were assessed for risk of bias and categorised according to three validation models: independent application of several case definitions on the same population, sequential application of different sets of diagnostic criteria, or comparison of prevalence estimates from different case definitions applied on different populations.

**Results** We identified 20 case definitions. A total of 36 studies contributed data of sufficient quality and consistency for evaluation of validity, with CDC-1994/Fukuda as the most frequently applied definition. No study rigorously assessed reproducibility or feasibility of case definitions. Validation studies were small with methodological weaknesses and inconsistent results. No empirical data indicated that certain case definitions specifically identified patients with a neuroimmunological condition.

**Conclusions** Classification of patients according to severity and symptom patterns, aiming to predict prognosis or therapy effect, seems useful. Development of further case definitions of CFS/ME should be given low priority. One can achieve consistency in research by applying diagnostic criteria that have been subjected to systematic evaluation.

## Article summary

### Article focus

- Several case definitions for CFS/ME exist, but there is no general agreement on a reference standard for diagnosis.
- This study aims to identify and describe differences between case definitions for Chronic Fatigue Syndrome/Myalgic Encephalitis (CFS/ME).
- Second, we explore how accuracy and validity of the case definitions can be evaluated in the absence of a reference standard.

### Key messages

- None of the included studies rigorously assesses the reproducibility or feasibility of existing case definitions.
- Only one included study reports data in a way that facilitates robust and direct comparisons of different case definitions.
- We found no empirical evidence supporting the hypothesis that some case definitions more specifically identify patients with a neuroimmunological condition.

### Strengths and limitations of this study

- The main strength of our study is the systematic methods used to identify and appraise articles presenting and evaluating case definitions of CFS/ME.
- We have used systematic and transparent approaches to extract data, categorise the studies according to pre-specified models, and to analyse and compare the data.
- The included validation studies show considerable methodological weaknesses and inconsistent results, and it is therefore difficult to draw firm conclusions.

## Introduction

Chronic fatigue syndrome (CFS) is a serious disorder characterised by persistent post-exertional fatigue and substantial symptoms related to cognitive, immune and autonomous dysfunction<sup>1,2</sup>. Disease mechanisms are complex<sup>3</sup>, with no single causal factor identified. Yet there are indications that infections<sup>4-8</sup> and autoimmune dysfunction<sup>9</sup> contribute to development and maintenance of symptoms, probably interacting with genetic<sup>10</sup> and psychosocial<sup>11-13</sup> factors.

Studies have identified pathological patterns and structures of the central nervous system<sup>14,15</sup>, dysregulation of body temperature and blood pressure<sup>16,17</sup>, and dysfunctional stress hormonal systems<sup>18,19</sup> in CFS patients compared to normal controls. None of these appears sufficiently consistent to constitute a diagnostic test. Case definitions (diagnostic criteria) are used in research and clinical practice to define the CFS diagnosis. Since the first case definition - the CDC-1988/Holmes Criteria - was presented in 1988<sup>20</sup>, numerous revisions have been developed, aiming for distinctive and reliable identification of individuals who represent a homogenous and consistent phenotype of the hypothesized disease entity, consistent with pathophysiological and psychosocial findings.

Holmes et al<sup>20</sup> coined the term “Chronic Fatigue Syndrome” in 1988, as an alternative to “The chronic Epstein-Barr virus syndrome”. Today the term “Myalgic Encephalomyelitis” (ME) is commonly used to conceptualize a specific neuroimmunological condition, assumed to be more severe and less psychologically attributed than CFS. In 2003, Carruthers et al presented the Canadian-2003 Criteria, for diagnosis of Myalgic Encephalomyelitis/Chronic Fatigue Syndrome<sup>21</sup>. A revised version was presented as International Consensus Criteria (the ICC- 2011 Criteria) for Myalgic Encephalomyelitis<sup>22</sup>, claiming to be a selective case definition for identification of patients with neuroimmune exhaustion with a pathologically low threshold of fatigability and symptom flare after exertion. The assertion that CFS and ME are different clinical entities is disputed. Below, we will pragmatically apply the term CFS/ME.

Johnston et al conducted a systematic review of the adoption of CFS/ME case definitions to assess prevalence and identified eight different case definitions<sup>23</sup>. There is no general

1  
2  
3 agreement on a reference standard for diagnosis, and no diagnostic test is available. No  
4 studies exist where diagnostic accuracy is assessed by comparing case definitions with a  
5 reference standard in consecutive patients suspected of having CFS/ME<sup>24</sup>. Bossuyt et al.  
6 include case definitions in their understanding of the term “test”, emphasizing that  
7 diagnostic tests are highly dynamic and need rigorous evaluation before they are  
8 introduced into clinical practice<sup>25</sup>.  
9

10 The objectives of our study were to explore strategies for evaluation of accuracy and  
11 concept validity of different case definitions for CFS/ME in the absence of a reference  
12 standard. First, we wanted to conduct a systematic review to identify and describe  
13 different case definitions (sets of diagnostic criteria) for CFS/ME. Second, we wanted to  
14 explore differences between various case definitions by identifying and reviewing  
15 validation studies.  
16  
17  
18  
19  
20  
21  
22  
23  
24

## 25 26 27 28 **Method and material**

### 29 30 *Protocol and registration*

31 We developed a protocol for our study, but we did not publish or register it.  
32  
33  
34  
35  
36

### 37 38 *Eligibility criteria*

39 We included studies presenting or validating case definitions for CFS/ME for adult  
40 populations (>18 years). No language restrictions were employed.  
41  
42  
43  
44  
45

### 46 47 *Information sources and search*

48 We searched The Cochrane Library, Ovid AMED, Ovid MEDLINE In-Process & Other  
49 Non-Indexed Citations, Ovid MEDLINE, Ovid EMBASE, CINAHL, Ovid PsycINFO,  
50 and PEDRO databases January 2012 using subject headings and text words (Appendix 1).  
51 We checked the reference lists of all included articles and searched for unpublished and  
52 on-going studies by correspondence with authors and field experts.  
53  
54  
55  
56  
57  
58  
59  
60

### *Study selection*

To select publications eligible for this review, two authors independently read all titles and abstracts in the records retrieved by the searches. We obtained publications in full text if the abstract was deemed eligible by at least one review author. At least two authors independently read the full text papers and selected studies according to the inclusion criteria.

### *Data collection process*

First, we listed all the identified *case definitions for CFS/ME*. We gathered information about citation from ISI and Google Scholar to indicate the impact or widespread of use, but we made no attempts to assess or rank the quality of the case definitions at this stage.

Then we organized and reviewed those of the identified studies which held a potential to compare and evaluate different case definitions – the *validation studies*. We developed three different models in which the validation studies could be categorised for comparison and evaluation:

Model A includes studies with *independent application of different case definitions on the same population* (Figure 1). This model presents the interrelationship between subpopulations identified by the different case definitions.

<Insert Figure 1 about here>

Model B includes studies where patients diagnosed with CFS/ME with *one set of diagnostic criteria are diagnosed sequentially with other case definitions* assumed to have increasing specificity (Figure 2).

<Insert Figure 2 about here>

Model C includes surveys or cross-sectional studies aimed at estimating the *prevalence* of CFS/ME obtained by applying different case definitions on different populations (Figure 3). These studies do not directly compare different case definitions, but may be used for proxy evaluation, similar to the strategy applied by Johnston et al<sup>23;26</sup>.

<Insert figure 3 about here>

### *Risk of bias in individual studies*

To differentiate between studies with higher and lower risk of bias, we critically appraised all included validation studies according to check lists: Studies comparing two or more case definitions directly (i.e. Model A or B) were appraised according to the QUADAS-criteria<sup>27</sup> (patient selection, index test, reference standard, flow, and timing). For evaluation of prevalence studies (i.e. Model C) we used an outline for assessment of external and internal validity (11 items) of prevalence studies<sup>28</sup>.

### *Analysis*

Participation in prevalence studies, surveys, and questionnaires vary across the included studies. Non-response is known to introduce bias, and methods to adjust for low response rates are available<sup>29</sup>. In studies affected by non-response, we have reported adjusted estimates whenever applicable. If adjusted estimates were unavailable, we have defined the proportion as the number of cases divided by the number of responders. We estimated 95 % confidence intervals for all proportions by using the Clopper-Pearson exact binomial method. We used R software version 3.0.0 and the rmeta package for statistical computations and plotting<sup>30,31</sup>.

## **Results**

### *Study selection*

Our systematic literature search identified 1036 unique references, of which 56 articles fulfilled our inclusion criteria (Figure 4). Among these, 20 articles present different *case definitions* of CFS/ME for research or clinical practice<sup>20-22;32-48</sup> (Table 1). The remaining 36 studies were classified as *validation studies*, contributing data of sufficient quality and consistency for evaluation of different case definitions according to our inclusion criteria.

< Insert Table 1 and Figure 4 about here >



1  
2  
3 The degree to which the different case definitions had been applied in research and  
4 clinical guidelines varied widely, with CDC-1994/Fukuda<sup>38</sup> as the most frequently cited  
5 case definition of CFS/ME.  
6  
7

8  
9 12 of the 20 identified case definitions had been assessed in one or more validation study  
10 20;21;32;33;35;36;38-40;42;43;46. For eight case definitions, no foundation for validation could be  
11 identified. We did not identify any study which rigorously assessed the reproducibility or  
12 feasibility of the different case definitions.  
13  
14

15  
16  
17  
18  
19 *Independent application of several case definitions on the same population (Model A)*  
20

21 Five studies (Table 2) applied several case definitions on the same population, but only  
22 one of these reported data in a way that facilitated sufficiently robust comparisons of case  
23 definitions<sup>49;50</sup>. Nacul et al.<sup>49</sup> used GP databases and questionnaires and identified 278  
24 patients with unexplained chronic fatigue conforming to one or more of the case  
25 definition applied, i.e. CDC-1994/Fukuda<sup>38</sup>, Canadian-2003<sup>21</sup> or ECD-2008<sup>33</sup>. Most of  
26 the patients who were positive according to the Canada-criteria [C+] were also positive  
27 using the Fukuda criteria [F+]. 47% of the Fukuda positive patients were also positive  
28 according to the Canada criteria. Patients who were positive to both the Canada and  
29 Fukuda [C+/ F+] reported a higher level of symptoms than those who were [F+/ C-]. The  
30 authors did not identify differences in the distribution of triggering factors<sup>49</sup>.  
31  
32  
33  
34  
35  
36  
37  
38  
39

40 < Insert Table 2 about here >  
41

42 None of the other four studies in this group reported data on the correlation between case  
43 definitions, patient profile, and symptom burden. Application of CDC-1988/Holmes case  
44 definition was consistently associated with lower prevalence estimates than CDC-  
45 1994/Fukuda, Oxford-1991, and Australian-1990 criteria across these four studies. There  
46 was no consistent trend for the other case definitions, but the studies were heterogeneous  
47 regarding application of the different case definitions and data collection (Table 2). This  
48 observation suggests that prevalence numbers obtained by different case definitions  
49 should be controlled according to diagnostic procedure, cut-off points and reasons for  
50 exclusions before concluding upon differences.  
51  
52  
53  
54  
55  
56  
57  
58  
59  
60

*Different case definitions with assumed increasing specificity applied sequentially on the same population (Model B)*

Eleven studies (Table 3) had sequentially applied different case definitions on the same population. In these studies, patients were screened by the use of an evaluation standard. Subsequently, test-positive individuals were screened with one or more comparators. Eight of the eleven studies applied CDC-1994/Fukuda as the evaluation standard, and then tested Fukuda-positive patients with CDC-1988/Holmes, Canadian-2003, ME-2011, Empirical-2006/Reeves, London-1990/Dowsett or Neurasthenia case definitions.

< Insert Table 3 about here >

We have taken the actual evaluation standard as a point of departure, and calculated the proportion of these patients still positive when applying other case definitions. Since there are no test negatives for the case definition used as point of departure, true sensitivities or specificities cannot be calculated. Results from two of the studies by Jason et al.<sup>32;51</sup> suggest that 40-70% of the Fukuda positive patients are also Canada positives [F+/C+]. One study<sup>51</sup> concluded that there was less psychiatric co-morbidity and more physical functional impairment in the sub-sample which was positive on both case definitions [F+/C+] than those who were negative according to the Canada criteria [F+/C-]. However, the other study<sup>32</sup> suggested a higher incidence of mental and cognitive problems among Fukuda positive patients who were also Canada positive [F+/C+] as compared to the remaining Fukuda positive but Canada negative patients [F+/C-].

The comparisons presented in table 3 are associated with high risk of bias as well as random errors, and the results should be interpreted with great caution. For example, two of the included studies reported similar point prevalence according to CDC-1994/Fukuda (2.1% and 2.6%) but reported very different estimates using the Australian-1990 criteria (7.6% and 1.4%)<sup>52;53</sup>. Sometimes diagnoses were based on questionnaire responses only, sometimes following detailed clinical interviews and laboratory testing. There are differences in the way similar case definitions had been practiced in the various studies, e.g. some studies applied a low threshold for exclusion of cases with psychiatric co-morbidity, while others did not.

*Indirect comparisons of prevalence estimates from several case definitions applied on different populations (Model C)*

We identified 17 studies (Table 4) presenting prevalence estimates for CFS/ME (Figure 3), in addition to the five studies presenting prevalence estimates following the application of multiple case definitions (Table 2). Based on these studies, we extracted 13 independent estimates of the prevalence following application of the CDC-1994/Fukuda criteria (Figure 5).

< Insert Table 4 about here >

Our analysis suggests that the population prevalence of CFS/ME according to the CDC-1994/Fukuda case definition probably is less than 1% (range 0.2 to 6.4%; median 1.2%), with higher prevalence among consecutive GP-attendants than from population studies. Prevalence estimates seemed higher when patients were diagnosed without a preceding medical examination. Prevalence estimates of CFS/ME according to CDC-1988/Holmes case definition seemed lower, with all the studies reporting prevalence estimates ranging from 0.0 to 0.3% (median 0.05%).

Five studies<sup>52-56</sup> reported CFS/ME prevalence estimates according to the Oxford-1991 case definition. These estimates ranged from 0.4% - 3.7% (median 1.5%). Four studies<sup>43;52-54</sup> reported prevalence estimates according to the Australian-1990 case definition ranging from 0.04% - 7.6% (median 1.2%).

## **Discussion**

We identified 20 studies presenting different CFS/ME case definitions, and 36 studies with data providing access to comparison and evaluation of some of these. Only a minority of existing case definitions had been submitted to comparative evaluations. The validation studies were methodologically weak and heterogeneous, making it difficult to compare case definitions. The most cited case definition (CDC-1994/Fukuda<sup>38</sup>) is also the most extensively validated one, whereas validation studies are few (Canadian-2003<sup>21</sup>) or missing (NICE-2007<sup>45</sup>, ICC-2011<sup>22</sup>) for more recently presented and debated case

1  
2  
3 definitions. We found no empirical evidence supporting the hypothesis that some case  
4 definitions more specifically identify patients with a neuroimmunological condition,  
5 excluding patients with psychiatric co-morbidity.  
6  
7  
8  
9

### 10 11 12 13 14 *Strengths and weaknesses of our study*

15  
16 The main strength of our study is the systematic methods used to identify and appraise  
17 articles presenting case definitions of CFS/ME and studies potentially useful to evaluate  
18 the case definitions. Furthermore, we have used systematic and transparent approaches to  
19 extract data from the validation studies, categorise the studies according to three different  
20 models, and to analyse and compare the data.  
21  
22  
23

24  
25 The STARD initiative aims to improve the reporting on studies of diagnostic accuracy,  
26 considering any method for obtaining additional information on a patient's health status  
27 as a test<sup>25</sup>. Due to the lack of a reference standard, we found this guideline less suitable  
28 for review of articles evaluating case definitions for CFS/ME. Still, issues such as study  
29 populations, test methods and rationale, technical specifications for application of the test,  
30 statistical methods for comparing measures of accuracy and uncertainty, estimates of  
31 diagnostic accuracy, variability, and clinical applicability<sup>25</sup> are relevant also for our  
32 analysis.  
33  
34  
35  
36  
37  
38  
39

40 The validation studies we identified were small with considerable methodological  
41 weaknesses and inconsistent results. Only one study held a level of rigor where  
42 independent application of several case definitions was conducted on the same population  
43 (Model A)<sup>49</sup>. Such a study should ideally be based on a population sample rather than a  
44 GP practice database, and should compare a selection of currently applied and debated  
45 case definitions, such as CDC-1994/Fukuda, Oxford-1991, Canadian-2003 and NICE-  
46 2007.  
47  
48  
49  
50  
51  
52

53 The QUADAS-criteria<sup>27</sup> demonstrate that Model B is an evaluation strategy prone to  
54 several sources of bias. First, the spectrum of patients subjected to the comparator is  
55 selected and not representative of the population receiving the test if it is used alone.  
56  
57  
58  
59  
60

1  
2  
3  
4  
5  
6  
7  
8  
9  
10  
11  
12  
13  
14  
15  
16  
17  
18  
19  
20  
21  
22  
23  
24  
25  
26  
27  
28  
29  
30  
31  
32  
33  
34  
35  
36  
37  
38  
39  
40  
41  
42  
43  
44  
45  
46  
47  
48  
49  
50  
51  
52  
53  
54  
55  
56  
57  
58  
59  
60

Second, as comparators were mostly applied subsequently to the evaluation standard, the clinical evaluations were not independent. The estimates from two of the Jason studies<sup>32;51</sup> suggest a comparable correspondence (40-70% of the F+ are also C+) with the results presented by Nacul and co-workers<sup>49</sup>. Yet, Model B gives no or limited information regarding those who screened negative in the first place. We do not know if some of those might have had a positive diagnosis if screened with one of the other case definitions.

Compared to Model B, we are even more prone to bias when exploring the consistency of different case definitions through indirect comparisons of prevalence estimates obtained from different populations (Model C), and great caution is needed when such indirect comparisons are undertaken. For example, two of the included studies reported similar point prevalence according to CDC-1994/Fukuda (2.1% and 2.6%) but reported very different estimates following the application of the Australian-1990 criteria (7.6% and 1.4%)<sup>52;53</sup>. This inconsistency is likely to be explained by the major methodological differences seen across the included studies; heterogeneity of study power and quality (such as recruitment strategy, response rate and strategies for non-response adjustment) and heterogeneity of how the diagnostic process was implemented. Some authors made diagnoses based on questionnaire responses, other conducted clinical interviews and laboratory testing. In their meta-analysis of 14 studies applying the CDC-1994/Fukuda case definition, Johnston et al found that the pooled prevalence for self-reporting assessment was 3.28% (95% CI: 2.24–4.33) and 0.76% (95% CI: 0.23–1.29) for clinical assessment<sup>26</sup>. Prevalence was lower in community samples (0.87%; 0.32–1.42) than in primary care samples (1.72%; 1.40–2.04). The prevalence estimates based on self-reports showed high variability, while clinically assessed estimates were more consistent, especially in the community samples.

### *The utility of case definitions and diagnoses*

The utility of a diagnosis is linked to the potential effects of being diagnosed (e.g. benefits and harms of the patient role, access to treatment and insurance). More importantly, a diagnosis is useful if it is linked to valid information regarding outcomes

1  
2  
3 of therapy or prognosis. Reitsma et al suggest clinical test validation as an alternative  
4 paradigm for evaluation of a diagnostic test when an acceptable reference standard is  
5 missing<sup>24</sup>. Hence, primary studies and systematic reviews on prognosis and therapy are  
6 alternative sources to evaluate the usefulness of different case definitions of CFS/ME. We  
7 have identified only one such publication, the PACE trial<sup>57</sup>. Here, participants were  
8 diagnosed according to the Oxford-1991 criteria, Empirical criteria-2007/ Reeves and  
9 London ME-1994/ National Task Force criteria, and then randomised to either standard  
10 medical treatment, graded exercise therapy, cognitive behaviour therapy or pacing. The  
11 results showed that the effectiveness of the treatments was similar across groups,  
12 irrespective of which case definition that was used. Fluge et al applied the CDC-  
13 1994/Fukuda and retrospectively added the Canada criteria in their study on the effects of  
14 rituximab in CFS<sup>9</sup> with comparable results.

15  
16  
17  
18  
19  
20  
21  
22  
23  
24  
25  
26  
27  
28  
29  
30  
31  
32  
33  
34  
35  
36  
37  
38  
39  
40  
41  
42  
43  
44  
45  
46  
47  
48  
49  
50  
51  
52  
53  
54  
55  
56  
57  
58  
59  
60  
A study comparing the prognosis of different diagnostic labels of fatigue found that  
patients with ME had the worst prognosis; while patients with post-viral fatigue  
syndrome had the best<sup>58</sup>. This could mean that the patients destined to the worst  
prognosis were labelled with the ME diagnosis, or it might be explained as an adverse  
effect of being labelled with ME. The authors found no significant difference in recorded  
fatigue before the diagnosis of CFS and ME, and the data in this retrospective study  
supported the hypothesis of the labeling effect. Another study found that the prognosis of  
patients who attributed their fatigue to ME was worse than of patients who attributed  
their fatigue to psychological or social factors<sup>59</sup>.

#### *Broad or narrow case definitions?*

Ideally, correspondence validity between test and target should be 100% for *sensitivity*  
(the capacity to identify patients in the target group) and *specificity* (the capacity to rule  
out patients that do not belong to the target group). More often, there is a trade-off  
between these measures, depending on the purpose of diagnosis. Emphasizing sensitivity  
implies a risk of over-diagnosis, which dilutes the actual diagnostic concept, while  
emphasizing specificity implies a risk of under-diagnosis, dismissing patients who might  
benefit from treatment. Development of more exclusive case definitions for CFS/ME

1  
2  
3  
4  
5  
6  
7  
8  
9  
10  
11  
12  
13  
14  
15  
16  
17  
18  
19  
20  
21  
22  
23  
24  
25  
26  
27  
28  
29  
30  
31  
32  
33  
34  
35  
36  
37  
38  
39  
40  
41  
42  
43  
44  
45  
46  
47  
48  
49  
50  
51  
52  
53  
54  
55  
56  
57  
58  
59  
60

have been proposed, claiming that existing case definitions do not select homogenous sets of patients<sup>22</sup>. More specifically, Oxford-1991, Fukuda-1994 and NICE-2007 have been criticized, especially by patient organizations, for undue overlap with psychopathology. Proponents of recent case definitions such as Canada-2003 and ICC-2011 aim for a narrow selection of patients with myalgic encephalomyelitis conforming to a hypothesized specific pathophysiology. Our review demonstrates, however, that these case definitions do not necessarily exclude patients with psychopathology.

A lesson could be learnt from Reeves, who tried to elaborate the CDC1994/Fukuda definition and bring methodological rigor into the diagnostic criteria by scores from standardized and validated instruments<sup>60</sup>. The Empirical-2006/Reeves case definition led to a tenfold prevalence estimate as compared with the CDC1994/Fukuda definition<sup>61</sup>, probably due to misclassification and inclusion of patients with major depressive disorder<sup>62</sup>. The purpose of rigor had not been achieved, and the Empirical-2006/Reeves case definition was never broadly implemented. According to our review, it is uncertain whether a more homogenous subset of patients can be achieved with the Canada-2003 and ICC-2011 case definitions. The authors of the latter paper write: “Collectively, members have approximately 400 years of both clinical and teaching experience, authored hundreds of peer-reviewed publications, diagnosed or treated approximately 50 000 patients with ME, and several members co-authored previous criteria.”<sup>22</sup>. This declaration is no validity criterion and provides no guarantee that the case definition works according to the intentions.

#### *Case definitions for research or clinical practice?*

*Research* requires uniform and reproducible criteria, suitable for unambiguous definitions of the target population. Another concern is to compare studies across time and nations. These are arguments for an inclusive case definition, preferably one which has been in use for a while, and for which validation studies are available. In CFS/ME research, the Oxford-1991 and CDC-1994/Fukuda are the most frequently used case definitions. Our review indicates that the former might be more inclusive, with lower specificity than the latter, although the impact of this is unclear. Proponents for more restrictive case



1  
2  
3 definitions dismiss findings from treatment studies documenting effects of cognitive  
4 behavioural treatment or graded exercise therapy for patients diagnosed with the Oxford-  
5 1991 or CDC-1994/Fukuda case definitions<sup>63</sup>. Their claim is that for a more exclusive  
6 selection of patients with ME, defined according to specific hypothesized  
7 pathophysiology, the side effects of these treatment modalities are hazardous. So far,  
8 however, treatment studies of side effects based on the Canada-2003 or ICC-2011 case  
9 definitions are not available.

10  
11 Case definitions for *clinical practice* should be research based, validated and manageable  
12 to provide a tool which can relieve patient uncertainty, prevent adverse effects of  
13 unnecessary treatment and diagnostic procedures, conserve limited healthcare resources  
14 and initiate the most appropriate treatment<sup>64</sup>. They should be founded on available  
15 knowledge regarding the mechanisms of the actual condition, validated through credible  
16 and transparent processes, and presented in a format which can be implemented in  
17 everyday practice. An argument for more inclusive case definitions for CFS/ME would  
18 be the issue of treatment, since based on existing evidence side effects of cognitive  
19 behavioural treatment or graded exercise therapy are negligible. For this context, the  
20 CDC-1994/Fukuda case definition appears suitable, with the NICE-2007 as a good  
21 candidate for validation studies.

### 32 33 34 35 36 37 38 39 **Implications for research and clinical practice**

40  
41 Based on our review, we argue that development of further case definitions of CFS/ME  
42 should be given low priority, as long as causal explanations for the disease are limited. It  
43 might still be useful to classify patients according to severity and symptom patterns,  
44 aiming to identify characteristics of patients that might predict differences in prognosis or  
45 expected effects of therapy.

46  
47 It is likely that all CFS/ME case definitions capture conditions with different or  
48 multifactorial pathogenesis and varying prognosis. The futile dichotomy of “organic”  
49 versus “psychic” disorder should be abandoned. Most medical disorders have a complex  
50 etiology. Psychological treatments are often helpful also for clear-cut somatic disorders.  
51 Unfortunately patient groups and researchers with vested interests in the belief that ME is  
52  
53  
54  
55  
56  
57  
58  
59  
60



1  
2  
3 a distinct somatic disease, seem unwilling to leave the position that ME is an organic  
4 disease only. This position has damaged the research and practice for patients suffering of  
5 CFS/ME.  
6  
7  
8  
9

## 10 11 **Conclusions**

12  
13 Our review provided no evidence that any of the case definitions identify patients with  
14 specific or “organic only” disease etiology. Priority should be given to further  
15 development and testing of promising treatment options for patients with CFS/ME.  
16  
17 Classification of patients according to severity and symptom patterns, aiming to identify  
18 characteristics of patients that might predict differences in prognosis or expected effects  
19 of therapy, might be useful. Development of further case definitions of CFS/ME should  
20 on the other hand be given low priority. Consistency in research can be achieved by  
21 application of diagnostic criteria which have been systematically evaluated and compared  
22 to other case definitions.  
23  
24  
25  
26  
27  
28  
29  
30  
31  
32  
33  
34  
35  
36  
37  
38  
39  
40  
41  
42  
43  
44  
45  
46  
47  
48  
49  
50  
51  
52  
53  
54  
55  
56  
57  
58  
59  
60

1  
2  
3 **Funding:** This research received no specific grant from any funding agency in the public,  
4 commercial or not-for-profit sectors.  
5  
6  
7

8  
9  
10 **Competing interests:** All authors have completed the ICMJE uniform disclosure form at  
11 [www.icmje.org/coi\\_disclosure.pdf](http://www.icmje.org/coi_disclosure.pdf) (available on request from the corresponding author)  
12 and declare that: (1) no support from any organisation for the submitted work; (2) no  
13 financial relationships with any organisations that might have an interest in the submitted  
14 work in the previous three years; (3) their spouses, partners, or children have no financial  
15 relationships that may be relevant to the submitted work; (4) no other non-financial  
16 interests that may be relevant to the submitted work.  
17  
18  
19  
20  
21  
22  
23  
24

25 **Contributors:** KM had the original idea, and all five authors worked together to develop  
26 an appropriate theoretical framework and design. MSF developed the search, and all  
27 authors were involved in the selection process. LL and KGB extracted relevant data,  
28 KGB performed the statistical analysis, and all authors were involved in the data  
29 interpretation. KM wrote the manuscript draft and revised the draft based on input from  
30 the other authors. All authors revised it critically for content and approved the final  
31 version.  
32  
33  
34  
35  
36  
37  
38  
39

40 **Ethical approval:** Not required.  
41  
42  
43  
44  
45  
46  
47  
48  
49  
50  
51  
52  
53  
54  
55  
56  
57  
58  
59  
60

## Reference List

- 1 (1) Afari N, Buchwald D. Chronic fatigue syndrome: a review. *Am J Psychiatry* 2003;160:221-236.
- 2
- 3 (2) Prins JB, van der Meer JW, Bleijenberg G. Chronic fatigue syndrome. *Lancet* 2006; 367:346-
- 4 355.
- 5
- 6 (3) White PD. What causes chronic fatigue syndrome? *BMJ* 2004; 329:928-929.
- 7
- 8 (4) Komaroff AL, Geiger AM, Wormsely S. IgG subclass deficiencies in chronic fatigue syndrome.
- 9 *Lancet* 1988; 1:1288-1289.
- 10
- 11 (5) Buchwald D, Wener MH, Pearlman T, et al. Markers of inflammation and immune activation in
- 12 chronic fatigue and chronic fatigue syndrome. *J Rheumatol* 1997;24:372-376.
- 13
- 14 (6) Lorusso L, Mikhaylova SV, Capelli E, et al. Immunological aspects of chronic fatigue syndrome.
- 15 *Autoimmun Rev* 2009;8:287-291.
- 16
- 17 (7) Wensaas KA, Langeland N, Hanevik K, et al. Irritable bowel syndrome and chronic fatigue 3
- 18 years after acute giardiasis: historic cohort study. *Gut* 2012;61:214-219.
- 19
- 20 (8) Komaroff AL. Chronic fatigue syndromes: relationship to chronic viral infections. *J Virol*
- 21 *Methods* 1988; 21:3-10.
- 22
- 23 (9) Fluge O, Bruland O, Risa K, et al. Benefit from B-lymphocyte depletion using the anti-CD20
- 24 antibody rituximab in chronic fatigue syndrome. A double-blind and placebo-controlled study.
- 25 *PLoS One* 2011; 6(10):e26358.
- 26
- 27 (10) Kerr JR, Petty R, Burke B, et al. Gene expression subtypes in patients with chronic fatigue
- 28 syndrome/myalgic encephalomyelitis. *J Infect Dis* 2008;197:1171-1184.
- 29
- 30 (11) Salit IE. Precipitating factors for the chronic fatigue syndrome. *J Psychiatr Res* 1997; 31:59-65.
- 31
- 32 (12) Kato K, Sullivan PF, Evengard B, et al. Premorbid predictors of chronic fatigue. *Arch Gen*
- 33 *Psychiatry* 2006;63:1267-1272.
- 34
- 35 (13) Knoop H, Prins JB, Moss-Morris R, et al. The central role of cognitive processes in the
- 36 perpetuation of chronic fatigue syndrome. *J Psychosom Res* 2010;68:489-494.
- 37
- 38 (14) Tirelli U, Chierichetti F, Tavio M, et al. Brain positron emission tomography (PET) in chronic
- 39 fatigue syndrome: preliminary data. *Am J Med* 1998;105(3A):54S-58S.
- 40
- 41 (15) Duffy FH, McAnulty GB, McCreary MC, et al. EEG spectral coherence data distinguish chronic
- 42 fatigue syndrome patients from healthy controls and depressed patients--a case control study.
- 43 *BMC Neurol* 2011;11:82.
- 44
- 45
- 46
- 47
- 48
- 49
- 50
- 51
- 52
- 53
- 54
- 55
- 56
- 57
- 58
- 59
- 60

- 1  
2  
3  
4  
5  
6  
7  
8  
9  
10  
11  
12  
13  
14  
15  
16  
17  
18  
19  
20  
21  
22  
23  
24  
25  
26  
27  
28  
29  
30  
31  
32  
33  
34  
35  
36  
37  
38  
39  
40  
41  
42  
43  
44  
45  
46  
47  
48  
49  
50  
51  
52  
53  
54  
55  
56  
57  
58  
59  
60
- (16) Wyller VB, Godang K, Morkrid L, et al. Abnormal thermoregulatory responses in adolescents with chronic fatigue syndrome: relation to clinical symptoms. *Pediatrics* 2007;120(1):e129-e137.
- (17) Wyller VB, Saul JP, Amlie JP, et al. Sympathetic predominance of cardiovascular regulation during mild orthostatic stress in adolescents with chronic fatigue. *Clin Physiol Funct Imaging* 2007;27:231-238.
- (18) Parker AJ, Wessely S, Cleare AJ. The neuroendocrinology of chronic fatigue syndrome and fibromyalgia. *Psychol Med* 2001;31:1331-1345.
- (19) Van HB, Van Den Eede F, Luyten P. Does hypothalamic-pituitary-adrenal axis hypofunction in chronic fatigue syndrome reflect a 'crash' in the stress system? *Med Hypotheses* 2009;72:701-705.
- (20) Holmes GP, Kaplan JE, Gantz NM, et al. Chronic fatigue syndrome: a working case definition. *Ann Intern Med* 1988;108:387-389.
- (21) Carruthers BM, Jain AK, De Meirleir KL, et al. Myalgic encephalomyelitis/chronic fatigue syndrome: clinical working case definition, diagnostic and treatment protocols. *J Chronic Fatigue Syndr* 2003;11:7-115.
- (22) Carruthers BM, van de Sande MI, De Meirleir KL, et al. Myalgic encephalomyelitis: International Consensus Criteria. *J Intern Med* 2011;270:327-338.
- (23) Johnston S, Brenu EW, Staines DR, et al. The adoption of chronic fatigue syndrome/myalgic encephalomyelitis case definitions to assess prevalence: a systematic review. *Ann Epidemiol* 2013;23:371-376.
- (24) Reitsma JB, Rutjes AW, Khan KS, et al. A review of solutions for diagnostic accuracy studies with an imperfect or missing reference standard. *J Clin Epidemiol* 2009;62:797-806.
- (25) Bossuyt PM, Reitsma JB, Bruns DE, et al. Towards complete and accurate reporting of studies of diagnostic accuracy: the STARD initiative. *BMJ* 2003;326:41-44.
- (26) Johnston S, Brenu EW, Staines D, et al. The prevalence of chronic fatigue syndrome/myalgic encephalomyelitis: a meta-analysis. *Clin Epidemiol* 2013;5:105-110.
- (27) Whiting P, Rutjes AW, Reitsma JB, et al. The development of QUADAS: a tool for the quality assessment of studies of diagnostic accuracy included in systematic reviews. *BMC Med Res Methodol* 2003;3:25.
- (28) Hoy D, Brooks P, Woolf A, et al. Assessing risk of bias in prevalence studies: modification of an existing tool and evidence of interrater agreement. *J Clin Epidemiol* 2012;65:934-939.

- 1  
2  
3  
4  
5  
6  
7  
8  
9  
10  
11  
12  
13  
14  
15  
16  
17  
18  
19  
20  
21  
22  
23  
24  
25  
26  
27  
28  
29  
30  
31  
32  
33  
34  
35  
36  
37  
38  
39  
40  
41  
42  
43  
44  
45  
46  
47  
48  
49  
50  
51  
52  
53  
54  
55  
56  
57  
58  
59  
60
- (29) Dillman DA, Eltinge JL, Groves RM, Little RJA. Survey nonresponse in design, data collection and analysis. In Groves RM, Kalton G, Rao JNK, Schwartz N, Skinner C, eds, Survey nonresponse. New York: John Wiley & Sons, Inc. 2002; 3-26.
- (30) R Core Team. R: A language and environment for statistical computing. Vienna, Austria: R Foundation for Statistical Computing. 2013. <http://www.R-project.org/> (accessed 29. August 2013).
- (31) Lumley T. rmeta: Meta-analysis. R package version 2.16. 2012. <http://CRAN.R-project.org/package=rmeta> (accessed 6. August 2013).
- (32) Jason LA, Brown A, Clyne E, et al. Contrasting case definitions for chronic fatigue syndrome, Myalgic Encephalomyelitis/chronic fatigue syndrome and myalgic encephalomyelitis. *Eval Health Prof* 2012;35:280-304.
- (33) Osoba T, Pheby D, Gray S, et al. The development of an epidemiological definition for myalgic encephalomyelitis/chronic fatigue syndrome. *J Chronic Fatigue Syndr* 2008;14:16-84.
- (34) Jones JF, Kohl KS, Ahmadipour N, et al. Fatigue: Case definition and guidelines for collection, analysis, and presentation of immunization safety data. *Vaccine* 2007;25:5685-5696.
- (35) Reeves WC, Lloyd A, Vernon SD, et al. Identification of ambiguities in the 1994 chronic fatigue syndrome research case definition and recommendations for resolution. *BMC Health Serv Res* 2003;3:25.
- (36) Dowsett EG, Ramsay AM, McCartney RA, et al. Myalgic encephalomyelitis - A persistent enteroviral infection? *Postgrad Med J* 1990;66:526-530.
- (37) Komaroff AL, Fagioli LR, Geiger AM, et al. An examination of the working case definition of chronic fatigue syndrome. *Am J Med* 1996;100:56-64.
- (38) Fukuda K, Straus SE, Hickie I, et al. The chronic fatigue syndrome: a comprehensive approach to its definition and study. International Chronic Fatigue Syndrome Study Group. *Ann Intern Med* 1994;121:953-959.
- (39) Sharpe MC, Archard LC, Banatvala JE, et al. A report--chronic fatigue syndrome: guidelines for research. *J Roy Soc Med* 1991;84:118-121.
- (40) Jason LA, Corradi K, Torres-Harding S. Toward an empirical case definition of CFS. *J Soc Serv Res* 2007;34:43-54.
- (41) Ramsey M.A. Myalgic encephalomyelitis and postviral fatigue states: The saga of royal free disease. 2nd ed. London, UK: Gower; 1988.

- 1  
2  
3  
4  
5  
6  
7  
8  
9  
10  
11  
12  
13  
14  
15  
16  
17  
18  
19  
20  
21  
22  
23  
24  
25  
26  
27  
28  
29  
30  
31  
32  
33  
34  
35  
36  
37  
38  
39  
40  
41  
42  
43  
44  
45  
46  
47  
48  
49  
50  
51  
52  
53  
54  
55  
56  
57  
58  
59  
60
- (42) Ho-Yen DO. Patient management of post-viral fatigue syndrome. *Br J Gen Pract* 1990; 40:37-39.
- (43) Lloyd AR, Hickie I, Boughton CR, et al. Prevalence of chronic fatigue syndrome in an Australian population. *Med J Aust* 1990;153:522-528.
- (44) Hyde B.M. The Nightingale Definition of Myalgic Encephalomyelitis (M.E.). 2007. Ottawa, Canada, The Nightingale Research Foundation.
- (45) National Collaborating Center for Primary Care. NICE clinical guideline 53. Chronic fatigue syndrome/myalgic encephalomyelitis (or encephalopathy): diagnosis and management of CFS/ME in adults and children. 2007. London, National Institute for Health and Clinical Excellence.
- (46) Jason LA, Evans M, Porter N, et al. The development of a revised Canadian myalgic encephalomyelitis chronic fatigue syndrome case definition. *Am J Biochem Biotechnol* 2010;6:120-135.
- (47) Report from the National Task Force on chronic fatigue syndrome (CFS), post viral fatigue syndrome (PVFS), myalgic encephalomyelitis (ME). 1994. Bristol: Westcare, The National Task Force on Chronic Fatigue Syndrome.
- (48) Hartz A.J., Kuhn E.M., Levine P.H. Characteristics of fatigued persons associated with features of chronic fatigue syndrome. *J Chronic Fatigue Syndr* 1998;4(3):71-97.
- (49) Nacul LC, Lacerda EM, Pheby D, et al. Prevalence of myalgic encephalomyelitis/chronic fatigue syndrome (ME/CFS) in three regions of England: a repeated cross-sectional study in primary care. *BMC Med* 2011;9:91.
- (50) Pheby D, Lacerda E, Nacul L, et al. A Disease Register for ME/CFS: Report of a Pilot Study. *BMC Res Notes* 2011;4:139.
- (51) Jason LA, Torres-Harding SR, Jurgens A, et al. Comparing the Fukuda et al. criteria and the Canadian case definition for chronic fatigue syndrome. *J Chronic Fatigue Syndr* 2004;12:2004-2052.
- (52) Wessely S, Chalder T, Hirsch S, et al. The prevalence and morbidity of chronic fatigue and chronic fatigue syndrome: a prospective primary care study. *Am J Public Health* 1997;87:1449-1455.
- (53) Lindal E, Stefansson JG, Bergmann S. The prevalence of chronic fatigue syndrome in Iceland - a national comparison by gender drawing on four different criteria. *Nord J Psychiatry* 2002;56:273-277.

- 1  
2  
3  
4  
5  
6  
7  
8  
9  
10  
11  
12  
13  
14  
15  
16  
17  
18  
19  
20  
21  
22  
23  
24  
25  
26  
27  
28  
29  
30  
31  
32  
33  
34  
35  
36  
37  
38  
39  
40  
41  
42  
43  
44  
45  
46  
47  
48  
49  
50  
51  
52  
53  
54  
55  
56  
57  
58  
59  
60
- (54) Bates DW, Schmitt W, Buchwald D, et al. Prevalence of fatigue and chronic fatigue syndrome in a primary care practice. *Arch Intern Med* 1993;153:2759-2765.
- (55) Kawakami N, Iwata N, Fujihara S, et al. Prevalence of chronic fatigue syndrome in a community population in Japan. *Tohoku J Exp Med* 1998;186:33-41.
- (56) Lawrie SM, Pelosi AJ. Chronic fatigue syndrome in the community. Prevalence and associations. *Br J psychiatry* 1995;166:793-797.
- (57) White PD, Goldsmith KA, Johnson AL, et al. Comparison of adaptive pacing therapy, cognitive behaviour therapy, graded exercise therapy, and specialist medical care for chronic fatigue syndrome (PACE): a randomised trial. *Lancet* 2011; 377:823-836.
- (58) Hamilton WT, Gallagher AM, Thomas JM, et al. The prognosis of different fatigue diagnostic labels: a longitudinal survey. *Fam Pract* 2005;22:383-388.
- (59) Chalder T, Power MJ, Wessely S. Chronic fatigue in the community: 'a question of attribution'. *Psychol Med* 1996;26:791-800.
- (60) Reeves WC, Wagner D, Nisenbaum R, et al. Chronic fatigue syndrome - A clinically empirical approach to its definition and study. *BMC Med* 2005;3:19.
- (61) Reeves WC, Jones JF, Maloney E, et al. Prevalence of chronic fatigue syndrome in metropolitan, urban, and rural Georgia. *Popul Health Metr* 2007;5:5.
- (62) Jason LA, Najar N, Porter N, et al. Evaluating the Centers for Disease Control's empirical chronic fatigue syndrome case definition. *J Disabil Policy Stud* 2009;20:93-100.
- (63) Twisk FN, Maes M. A review on cognitive behavioral therapy (CBT) and graded exercise therapy (GET) in myalgic encephalomyelitis (ME) / chronic fatigue syndrome (CFS): CBT/GET is not only ineffective and not evidence-based, but also potentially harmful for many patients with ME/CFS. *Neuro Endocrinol Lett* 2009;30:284-299.
- (64) Mearin F, Lacy BE. Diagnostic criteria in IBS: useful or not? *Neurogastroenterol Motil* 2012;24:791-801
- (65) Pawlikowska T, Chalder T, Hirsch SR, et al. Population based study of fatigue and psychological distress. *BMJ* 1994;308:763-766.
- (66) Brimacombe M, Helmer D, Natelson BH. Clinical differences exist between patients fulfilling the 1988 and 1994 case definitions of chronic fatigue syndrome. *J Clin Psychol Med S* 2002;9:309-314.
- (67) Jason LA, Torres-Harding SR, Taylor RR, et al. A comparison of the 1988 and 1994 diagnostic criteria for chronic fatigue syndrome. *J Clin Psychol Med S* 2001;8:337-343.



- 1  
2  
3  
4 (68) Jason LA, Skendrovic B, Furst J, et al. Data mining: comparing the empiric CFS to the Canadian  
5 ME/CFS case definition. *J Clin Psychol* 2012;68:41-49.  
6  
7 (69) Jason LA, Helgerson J, Torres-Harding SR, et al. Variability in diagnostic criteria for chronic  
8 fatigue syndrome may result in substantial differences in patterns of symptoms and disability.  
9 *Eval Health Prof* 2003;26:3-22.  
10  
11 (70) Wearden AJ, Dowrick C, Chew-Graham C, et al. Nurse led, home based self help treatment for  
12 patients in primary care with chronic fatigue syndrome: randomised controlled trial. *BMJ*  
13 2010;340:c1777.  
14  
15 (71) Stubhaug B, Lie SA, Ursin H, et al. Cognitive-behavioural therapy v. mirtazapine for chronic  
16 fatigue and neurasthenia: randomised placebo-controlled trial. *Br J Psychiatry* 2008;192:217-  
17 223.  
18  
19 (72) Bazelmans E, Vercoulen JHMM, Swanink CMA, et al. Chronic Fatigue Syndrome and Primary  
20 Fibromyalgia Syndrome as recognized by GPs. *Fam Pract* 1999;16:602-604.  
21  
22 (73) Buchwald D, Umali P, Umali J, et al. Chronic fatigue and the chronic fatigue syndrome:  
23 Prevalence in a Pacific northwest health care system. *Ann Intern Med* 1995;123:15-88.  
24  
25 (74) Gunn WJ, Connell DB, Randall B. Epidemiology of chronic fatigue syndrome: the Centers for  
26 Disease Control Study. *Ciba Found Symp* 1993;173:83-93.  
27  
28 (75) Price RK, North CS, Wessely S, et al. Estimating the prevalence of chronic fatigue syndrome  
29 and associated symptoms in the community. *Public Health Rep* 1992;107:514-522.  
30  
31 (76) Versluis RG, de Waal MW, Opmeer C, et al. Prevalence of chronic fatigue syndrome in 4 family  
32 practices in Leiden. *Ned Tijdschr Geneeskd* 1997; 141:1523-1526.  
33  
34 (77) Cho HJ, Menezes PR, Hotopf M, et al. Comparative epidemiology of chronic fatigue syndrome  
35 in Brazilian and British primary care: Prevalence and recognition. *Br J psychiatry* 2009;194:117-  
36 122.  
37  
38 (78) Evengard B, Jacks A, Pedersen NL, et al. The epidemiology of chronic fatigue in the Swedish  
39 Twin Registry. *Psychol Med* 2005;35:1317-1326.  
40  
41 (79) Hamaguchi M, Kawahito Y, Takeda N, et al. Characteristics of chronic fatigue syndrome in a  
42 Japanese community population : chronic fatigue syndrome in Japan. *Clin Rheumatol*  
43 2011;30:895-906.  
44  
45 (80) Jason LA, Richman JA, Rademaker AW, et al. A community-based study of chronic fatigue  
46 syndrome. *Arch Intern Med* 1999;159:2129-2137.  
47  
48  
49  
50  
51  
52  
53  
54  
55  
56  
57  
58  
59  
60



- 1  
2  
3  
4  
5  
6  
7  
8  
9  
10  
11  
12  
13  
14  
15  
16  
17  
18  
19  
20  
21  
22  
23  
24  
25  
26  
27  
28  
29  
30  
31  
32  
33  
34  
35  
36  
37  
38  
39  
40  
41  
42  
43  
44  
45  
46  
47  
48  
49  
50  
51  
52  
53  
54  
55  
56  
57  
58  
59  
60
- (81) Kim CH, Shin HC, Won CW. Prevalence of chronic fatigue and chronic fatigue syndrome in Korea: community-based primary care study. *J Korean Med Sci* 2005;20:529-534.
- (82) Njoku MG, Jason LA, Torres-Harding SR. The prevalence of chronic fatigue syndrome in Nigeria. *J Health Psychol* 2007;12:461-474.
- (83) Reyes M, Nisenbaum R, Hoaglin DC, et al. Prevalence and incidence of chronic fatigue syndrome in Wichita, Kansas. *Arch Intern Med* 2003;163:14-1536.
- (84) Steele L, Dobbins JG, Fukuda K, et al. The epidemiology of chronic fatigue in San Francisco. *Am J Med* 1998;105(3A):83S-90S.
- (85) van't Leven M, Zielhuis GA, van der Meer JW, et al. Fatigue and chronic fatigue syndrome-like complaints in the general population. *Eur J Public Health* 2010;20:25-257.
- (86) Yiu YM, Qiu MY. A preliminary epidemiological study and discussion on traditional Chinese medicine pathogenesis of chronic fatigue syndrome in Hong Kong. *Zhong Xi Yi Jie He Xue Bao* 2005;3:359-62.
- (87) Ho-Yen DO, McNamara I. General practitioners' experience of the chronic fatigue syndrome. *Br J Gen Pract* 1991;41:324-326.

**Table 1**  
**Case definitions for CFS/ME**

| CASE DEFINITIONS<br>(chronologically)                       | Developed from other<br>criteria or definitions? | INSTITUTION AND COUNTRY OF FIRST AUTHOR                           | CITATIONS <sup>A</sup><br>ISI/Google Scholar |
|-------------------------------------------------------------|--------------------------------------------------|-------------------------------------------------------------------|----------------------------------------------|
| CDC-1988/Holmes <sup>20</sup>                               |                                                  | Centers for Disease Control, Atlanta, USA                         | 1106/1542                                    |
| Myalgic encephalomyelitis 1988/Ramsey <sup>41</sup>         |                                                  | Royal Free Hospital, London, UK                                   | 6/51                                         |
| London-1990/Dowsett <sup>36</sup>                           |                                                  | Royal Free Hospital, London, UK                                   | 55/88                                        |
| Australian-1990 <sup>43</sup>                               |                                                  | The Prince Henry Hospital, Little Bay, Australia                  | 230/343                                      |
| Post-viral fatigue syndrome-1990 <sup>42</sup>              |                                                  | Raigmore Hospital, Inverness, UK                                  | 14/28                                        |
| Oxford-1991 <sup>39</sup>                                   |                                                  | University of Oxford, Oxford, UK                                  | 476/667                                      |
| London ME-1994/National Task Force Guidelines <sup>47</sup> |                                                  | National Task Force, Bristol, UK                                  | no records                                   |
| CDC-1994/Fukuda <sup>38</sup>                               | CDC-1988                                         | Centers for Disease Control, Atlanta, USA                         | 1860/3006                                    |
| Working Case Definition-1996 <sup>37</sup>                  | CDC-1988                                         | Brigham and Women's Hospital Massachusetts, USA                   | 78/138                                       |
| Chronic Fatigue Syndrome-1998 <sup>48</sup>                 | CDC-1994                                         | Medical College of Wisconsin, USA                                 | 8/23                                         |
| Canadian-2003 <sup>21</sup>                                 |                                                  | Royal College of Physicians and Surgeons of Canada, Canada        | 69/233                                       |
| Empirical CDC-2005/Reeves <sup>60</sup>                     | CDC-1994                                         | Centers for Disease Control and Prevention, Atlanta, USA          | 73/154                                       |
| Empirical-2007 <sup>40</sup>                                |                                                  | DePaul University, Chicago, USA                                   | 5/14                                         |
| Brighton Collaboration-2007 <sup>34</sup>                   |                                                  | Centers for Disease Control and Prevention, Atlanta, USA          | 1/5                                          |
| NICE-2007 Guidelines <sup>45</sup>                          |                                                  | National Institute for Health and Clinical Excellence, London, UK | no records/23 <sup>B</sup>                   |
| The Nightingale Definition of ME/Hyde-2007 <sup>44</sup>    |                                                  | The Nightingale Research Foundation, Canada                       | no records/5                                 |
| Epidemiological CFS/ME Definition-2008 <sup>33</sup>        |                                                  | Southampton, Hampshire, UK                                        | 2/4                                          |
| Revised Canadian-2010 <sup>46</sup>                         | CDC-1994, Empirical CDC-2005, Canadian-2003      | DePaul University, Illinois, USA                                  | 8/18                                         |
| ICC-2011 <sup>22</sup>                                      | Canadian-2003                                    | Independent, Canada                                               | 4/16                                         |
| ME-2011 <sup>32</sup>                                       | Dowsett, Ramsey, Hyde                            | DePaul University, Illinois, USA                                  | 1/1                                          |

<sup>A</sup>Searched 23. May 2012 <sup>B</sup> Summary of the NICE Guidelines in: *Diagnosis and management of chronic fatigue syndrome or myalgic encephalomyelitis (or encephalopathy): summary of NICE guidance BMJ 2007; 335:446*

Table 2

**Studies presenting prevalence estimates\* by independent application of several case definitions on the same population (Model A)**

| First author, year, country           | Data collection                                                                                                                                                                                                                                                        | Prevalence (95 % CI)                                                                                        |
|---------------------------------------|------------------------------------------------------------------------------------------------------------------------------------------------------------------------------------------------------------------------------------------------------------------------|-------------------------------------------------------------------------------------------------------------|
| Nacul <sup>49</sup><br>2011, UK       | 609 possible cases electronically identified in databases of 29 GP practices. 70 excluded after clinical revision (explained fatigue), 135 refusals and 126 non-cases.                                                                                                 | ECD: 0.03 % (0.02-0.04)<br>Canada: 0.10 % (0.09-0.12)<br>Fukuda: 0.19 % (0.17-0.21)                         |
| Bates <sup>54</sup><br>1993, US       | 995 consecutive GP visitors invited - 94 % screened by a questionnaire to detect major fatigue. Selected patients further evaluated by questionnaires, physical examinations and interviews.                                                                           | Holmes: 0.3 % (0.1-0.9)<br>Oxford: 0.4 % (0.1 -1.1)<br>Australia: 1.1 % (0.5-2.0)                           |
| Kawakami <sup>55</sup><br>1998, Japan | All adults (n=508) in Town A, Kofu-city, were invited to participate in this structured psychiatric diagnostic interview survey. 137 (27%) completed the study                                                                                                         | Holmes: 0.0 % (0.0-2.7)<br>Fukuda: 1.5 % (0.2-5.2)<br>Oxford: 1.5 % (0.2-5.2)                               |
| Lindal <sup>53</sup><br>2002, Iceland | Survey sent to 4000 randomly selected adult participants – 63% responded. Questionnaire included questions on all items in the four case definitions. Diagnosis were set electronically based on received responses. No medical tests or examinations were undertaken. | Holmes 0.0 % (0.0-1.5)<br>Fukuda: 2.1 % (1.6-2.8)<br>Oxford: 3.7 % (3.2-4.6)<br>Australia: 7.6 % (6.6-8.7)  |
| Wessely <sup>52;65</sup><br>1997, UK  | 2363 patients followed in a cohort study – 84% completed. Fatigued participant subjected to detailed questionnaires, interviews, and laboratory testing. Separate estimates reported for inclusion/exclusion of psychiatric co-morbidity.                              | Holmes: 1.2 % (0.5-1.8)<br>Australia: 1.4 % (0.8-2.0)<br>Oxford: 2.2 % (1.4-3.0)<br>Fukuda: 2.6 % (1.7-3.4) |

\*Prevalence estimates were calculated with the number of responders in the denominator. The choice of denominator may have large implications with regard to the subsequent prevalence estimate, particularly in studies with low response rate. Hence, depending on the actual response rate, estimates presented for each study may be biased.

Table 3

**Conformity of prevalence estimates in studies where patients diagnosed with CFS/ME with one set of diagnostic criteria are diagnosed sequentially with other case definitions (Model B)**

| Study Recruitment                                                                 | Case definitions                                   | Conformity <sup>#</sup><br>(95% CI)                                                                   | Symptom and burden profile                                                                                                                                                                                                                       |
|-----------------------------------------------------------------------------------|----------------------------------------------------|-------------------------------------------------------------------------------------------------------|--------------------------------------------------------------------------------------------------------------------------------------------------------------------------------------------------------------------------------------------------|
| <b>Brimacombe</b> <sup>66</sup> , US<br>Fukuda-positive from register             | Fukuda* (n=200)<br>Holmes (n=171)                  | 1<br>0.85 (0.80-0.90)                                                                                 | [F+/H-] patients do not endorse infectious-type symptoms as often or to the same degree of severity as [F+/H+] patients                                                                                                                          |
| <b>Jason</b> <sup>67</sup> , US<br>Fukuda-positive from register                  | Fukuda* (n=32)<br>Holmes (n=14)                    | 1<br>0.44 (0.26-0.62)                                                                                 | [F+/H+] patients with more symptoms and functional impairment than [F+/H-]. No difference in psychological co-morbidity                                                                                                                          |
| <b>Jason</b> <sup>51</sup> , US<br>Fukuda-positive from register                  | Fukuda* (n=32)<br>Canada (n=23) <sup>§</sup>       | 1<br>0.63 (0.44-0.79)                                                                                 | C+ patients have less psychiatric co-morbidity, more physical function impairment, are more fatigued with more neurological symptoms than [F+/C-] patients                                                                                       |
| <b>Jason</b> <sup>32</sup> , US<br>Fukuda-positive recruited from many sources    | Fukuda* (n=114)<br>Canada (n=57)<br>ME-2011 (n=27) | 1<br>0.50 (0.41-0.60)<br>0.24 (0.16-0.33)                                                             | [F+/C+] patients had more functional impairments, and physical, mental, and cognitive problems than [F+/C-] patients. [F+/ME+] patients had more functional impairments, and more severe physical and cognitive symptoms than [F+/ME-] patients. |
| <b>Fluge</b> <sup>9</sup> , Norway<br>Fukuda-positive patients recruited to trial | Fukuda* (n=30)<br>Canada (n=28)                    | 1<br>0.93 (0.78-0.99)                                                                                 | Not reported                                                                                                                                                                                                                                     |
| <b>Jason</b> <sup>68</sup> , US<br>Register                                       | Fukuda* (n=24)<br>Reeves empirical<br>Canada       | Of 24 F+ and 84 F-<br>patients empirical<br>criteria and Canada<br>identified 79 and<br>87% correctly | Canada-2003 case definition appear to select more cardinal and central features of the illness than Empirical CDC-2005/Reeves case definition                                                                                                    |
| <b>Jason</b> <sup>62</sup> , US<br>Register                                       | Fukuda* (n=27)<br>Reeves emp. (n=41) <sup>§§</sup> | 1<br>1.00 (0.87-1.00)                                                                                 | Empirical CDC-2005/Reeves case definition led to mis-classification of major depressive disorder as CFS                                                                                                                                          |

28

|                                                                                             |                                                        |                                           |                                                                                                                             |
|---------------------------------------------------------------------------------------------|--------------------------------------------------------|-------------------------------------------|-----------------------------------------------------------------------------------------------------------------------------|
| <b>Jason</b> <sup>69</sup> , US<br>Fukuda-positive from register                            | Fukuda* (n=32)<br>Dowsett (n=17) <sup>§§§</sup>        | 1<br>0.44 (0.26-0.62)                     | D+ patients appear to be more symptomatic than [F+/D-] patients, especially in the neurological and neuropsychiatric areas. |
| <b>White</b> <sup>57</sup> , UK<br>Oxford-positive patients recruited to trial              | Oxford* (n=641)<br>Fukuda (n=427)<br>London ME (n=329) | 1<br>0.67 (0.63-0.70)<br>0.51 (0.47-0.55) | Effect of CBT and GET similar regardless of diagnostic group affiliation                                                    |
| <b>Wearden</b> <sup>70</sup> , UK<br>Oxford-positive patients recruited to trial            | Oxford* (n=296)<br>London ME (n=92)                    | 1<br>0.31 (0.26-0.37)                     | Not reported                                                                                                                |
| <b>Stubhaug</b> <sup>71</sup> , Norway<br>Neurasthenia-positive patients recruited to trial | Neurasthenia* (n=72)<br>Oxford (n=65)<br>Fukuda (n=29) | 1<br>0.90 (0.81-0.96)<br>0.40 (0.29-0.53) | Not reported                                                                                                                |

#The proportion of cases relative to the evaluation standard; \*Evaluation standard;  
 § 3/23 participants testing positive according to Canada were negative according to Fukuda  
 §§ 14/37 depressed patients tested positive according to Reeves and negative on Fukuda  
 §§§ 3/17 participants testing positive according to Dowsett were negative according to Fukuda

**Table 4****Studies presenting prevalence estimates for CFS/ME from several case definitions applied on different populations (Model C)**

| First author, year<br>COUNTRY                     | CASE<br>DEFINITION                   | RECRUITMENT STRATEGY                                                                             |
|---------------------------------------------------|--------------------------------------|--------------------------------------------------------------------------------------------------|
| Bazelmans 1999 <sup>72</sup><br>The Netherlands   | As recognized by<br>GP               | Questionnaire to all GPs,<br>Prevalence estimated to 0.11 %                                      |
| Lloyd 1990 <sup>43</sup><br>Australia             | Australian                           | Recruited through GP's covering 76206 patients                                                   |
| Buchwald 1995 <sup>73</sup><br>US                 | CDC-1988/<br>Holmes                  | Postal survey to 4000 randomly selected participants                                             |
| Gunn 1993 <sup>74</sup><br>US                     | CDC-1988/<br>Holmes                  | Recruited by contact with primary health care providers;<br>prevalence in the range 0.002-0.007% |
| Price 1992 <sup>75</sup><br>USA                   | CDC-1988/<br>Holmes                  | Interview survey with 13538 participants                                                         |
| Versluis 1997 <sup>76</sup><br>The Netherlands    | CDC-1988/<br>Holmes                  | 23000 patients in GP database                                                                    |
| Bierl 2004<br>US                                  | CDC-1994/<br>Fukuda                  | Random digit-dialing survey with 7317 respondent                                                 |
| Cho 2009 <sup>77</sup><br>UK                      | CDC-1994/<br>Fukuda                  | 2530 consecutive GP visitors                                                                     |
| Cho 2009 <sup>77</sup><br>Brazil                  | CDC-1994/<br>Fukuda                  | 3921 consecutive GP visitors                                                                     |
| Evengård 2005 <sup>78</sup><br>Sweden             | CDC-1994/<br>Fukuda                  | Phone survey of 41499 participants in a twin register                                            |
| Hamagucchi 2011 <sup>79</sup><br>Japan            | CDC-1994/<br>Fukuda                  | 3000 random participants in a health check program                                               |
| Jason 1999 <sup>80</sup><br>US                    | CDC-1994/<br>Fukuda                  | Phone survey with 18675 respondents                                                              |
| Kim 2005 <sup>81</sup><br>South Korea             | CDC-1994/<br>Fukuda                  | 1962 consecutive GP visitors                                                                     |
| Njoku 2007 <sup>82</sup><br>Nigeria               | CDC-1994/<br>Fukuda                  | Interview survey with 1500 participants                                                          |
| Reeves 2007 <sup>61</sup><br>US                   | CDC-1994/<br>empirical               | Phone survey with 10837 responding households                                                    |
| Reyes 2003 <sup>83</sup><br>US                    | CDC-1994/<br>Fukuda                  | Phone survey with 33997 responding households                                                    |
| Steele 1998 <sup>84</sup><br>US                   | CDC-1994/<br>Fukuda                  | Phone survey with 8004 responding households                                                     |
| van't Leven 2009 <sup>85</sup><br>The Netherlands | CDC-1994/<br>Fukuda                  | Postal survey to 22500 randomly selected participants                                            |
| Yiu 2005 <sup>86</sup><br>China                   | CDC-1994/<br>Fukuda                  | Unknown                                                                                          |
| Lawrie 1995 <sup>56</sup><br>UK                   | Oxford                               | Postal survey to 1039 randomly selected participants                                             |
| Ho-Yen 1991 <sup>87</sup><br>UK                   | Post viral<br>exhaustion<br>syndrome | Postal survey to 195 GPs; prevalence 0.13 % (0.12-0.15)                                          |

## Figure legends

### Figure 1

Model A: Evaluation design with independent application of several case definitions on the same background population

### Figure 2

Model B: Evaluation design where different case definitions with assumed increasing specificity are applied sequentially on the same population

### Figure 3

Model C: Evaluation design with indirect comparisons of prevalence estimates from several case definitions applied on different populations

### Figure 4

Flow chart summarising the selection process

### Figure 5

Forest plot summarising indirect comparisons of prevalence estimates from different case definitions with the CDC-1994/Fukuda criteria (Model C). Studies presenting point prevalence weighted for non-response are asterisked (\*)

1  
2  
3  
4  
5  
6  
7  
8  
9  
10  
11  
12  
13  
14  
15  
16  
17  
18  
19  
20  
21  
22  
23  
24  
25  
26  
27  
28  
29  
30  
31  
32  
33  
34  
35  
36  
37  
38  
39  
40  
41  
42  
43  
44  
45  
46  
47  
48  
49  
50  
51  
52  
53  
54  
55  
56  
57  
58  
59  
60

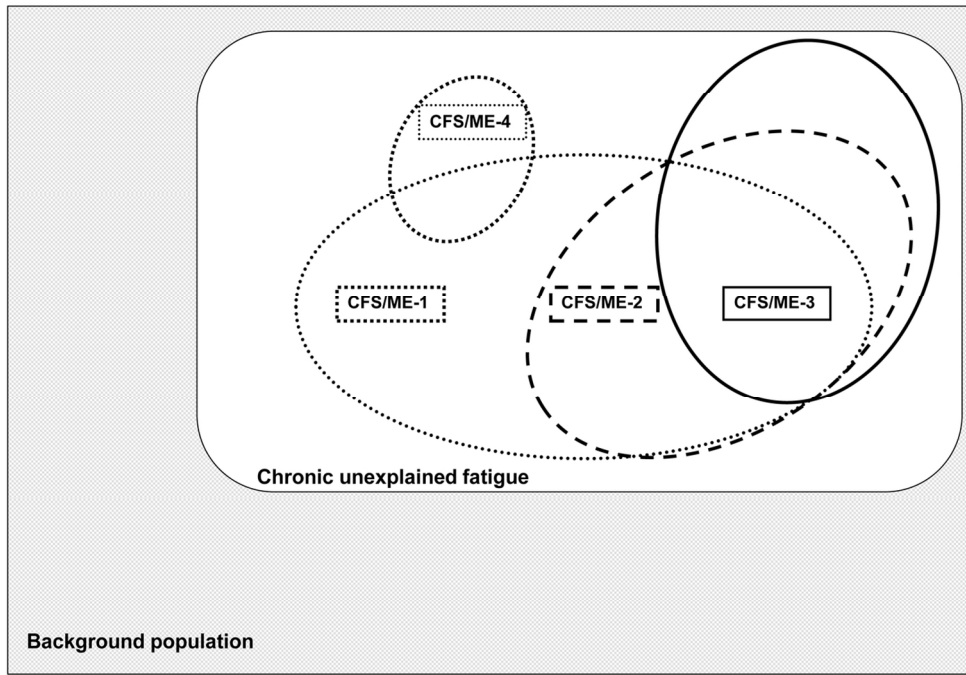

Model A: Evaluation design with independent application of several case definitions on the same background population  
123x87mm (300 x 300 DPI)

Review only



1  
2  
3  
4  
5  
6  
7  
8  
9  
10  
11  
12  
13  
14  
15  
16  
17  
18  
19  
20  
21  
22  
23  
24  
25  
26  
27  
28  
29  
30  
31  
32  
33  
34  
35  
36  
37  
38  
39  
40  
41  
42  
43  
44  
45  
46  
47  
48  
49  
50  
51  
52  
53  
54  
55  
56  
57  
58  
59  
60

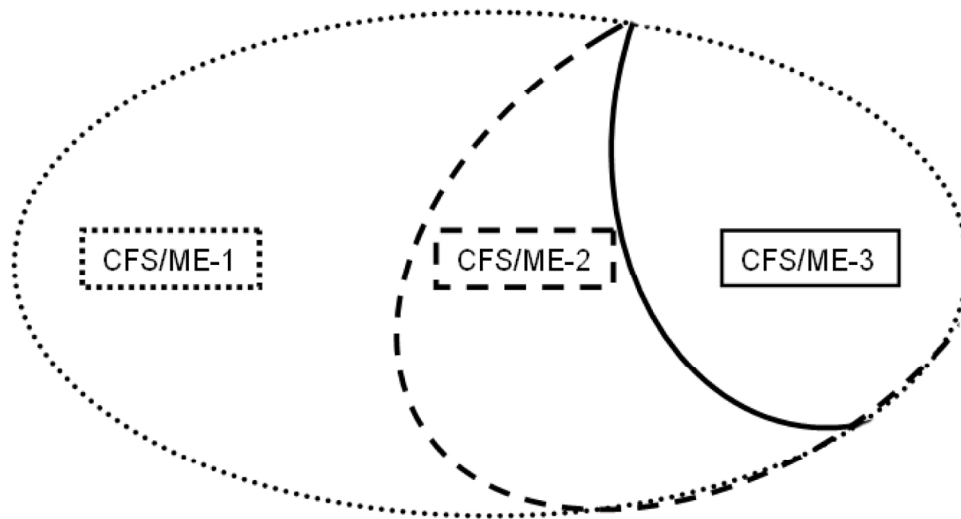

Model B: Evaluation design where different case definitions with assumed increasing specificity are applied sequentially on the same population  
139x77mm (300 x 300 DPI)

review only

1  
2  
3  
4  
5  
6  
7  
8  
9  
10  
11  
12  
13  
14  
15  
16  
17  
18  
19  
20  
21  
22  
23  
24  
25  
26  
27  
28  
29  
30  
31  
32  
33  
34  
35  
36  
37  
38  
39  
40  
41  
42  
43  
44  
45  
46  
47  
48  
49  
50  
51  
52  
53  
54  
55  
56  
57  
58  
59  
60

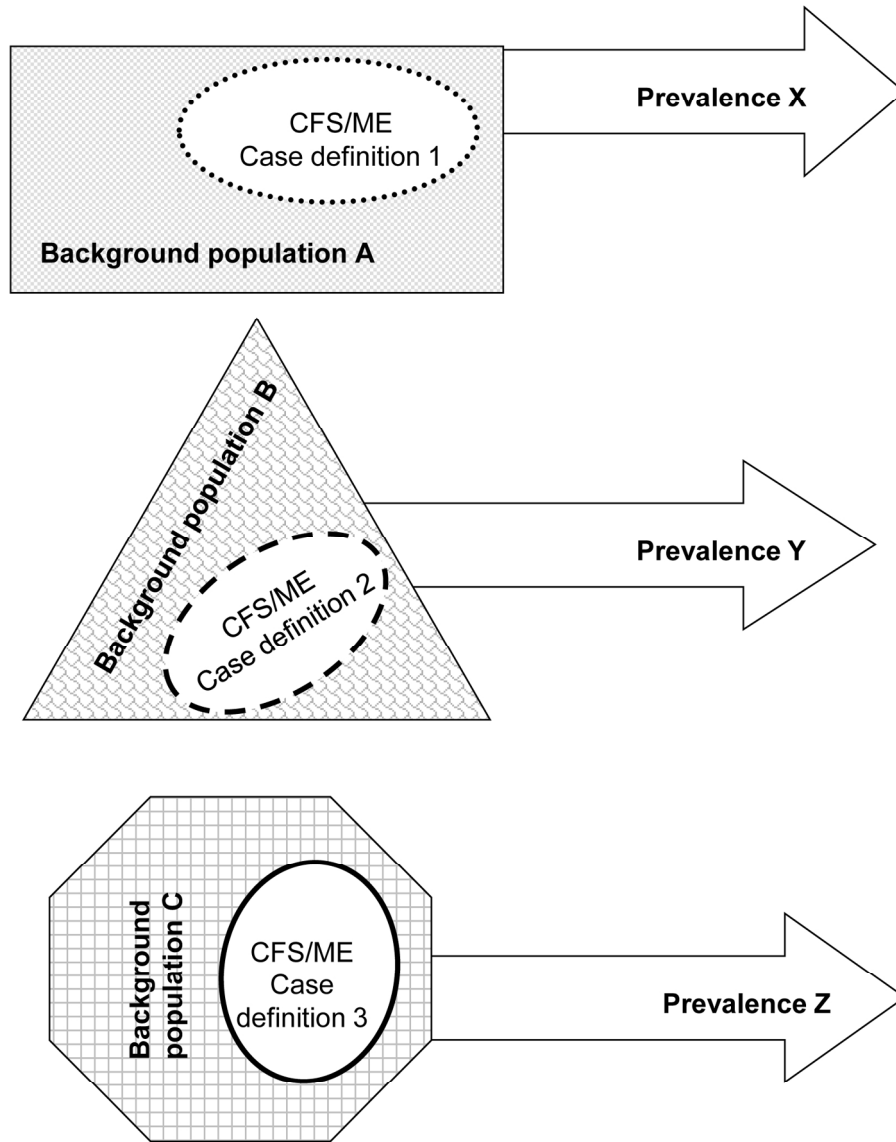

Model C: Evaluation design with indirect comparisons of prevalence estimates from several case definitions applied on different populations  
145x185mm (300 x 300 DPI)

1  
2  
3  
4  
5  
6  
7  
8  
9  
10  
11  
12  
13  
14  
15  
16  
17  
18  
19  
20  
21  
22  
23  
24  
25  
26  
27  
28  
29  
30  
31  
32  
33  
34  
35  
36  
37  
38  
39  
40  
41  
42  
43  
44  
45  
46  
47  
48  
49  
50  
51  
52  
53  
54  
55  
56  
57  
58  
59  
60

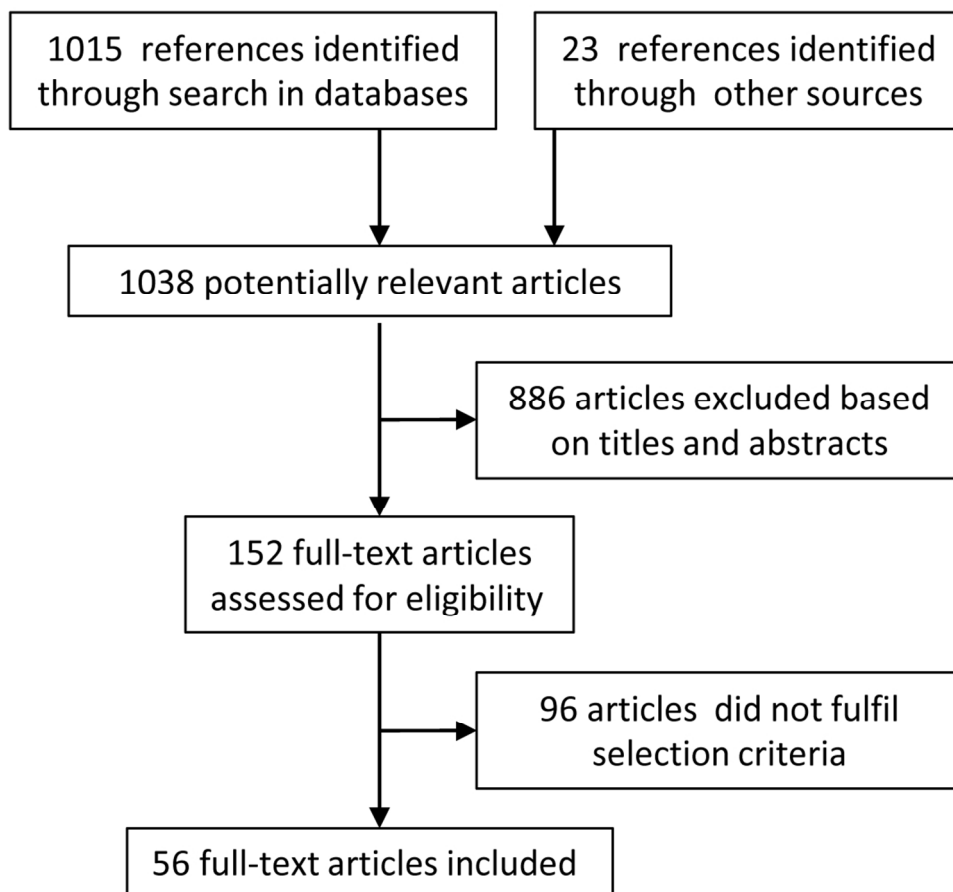

Flow chart summarising the selection process  
103x99mm (300 x 300 DPI)

only

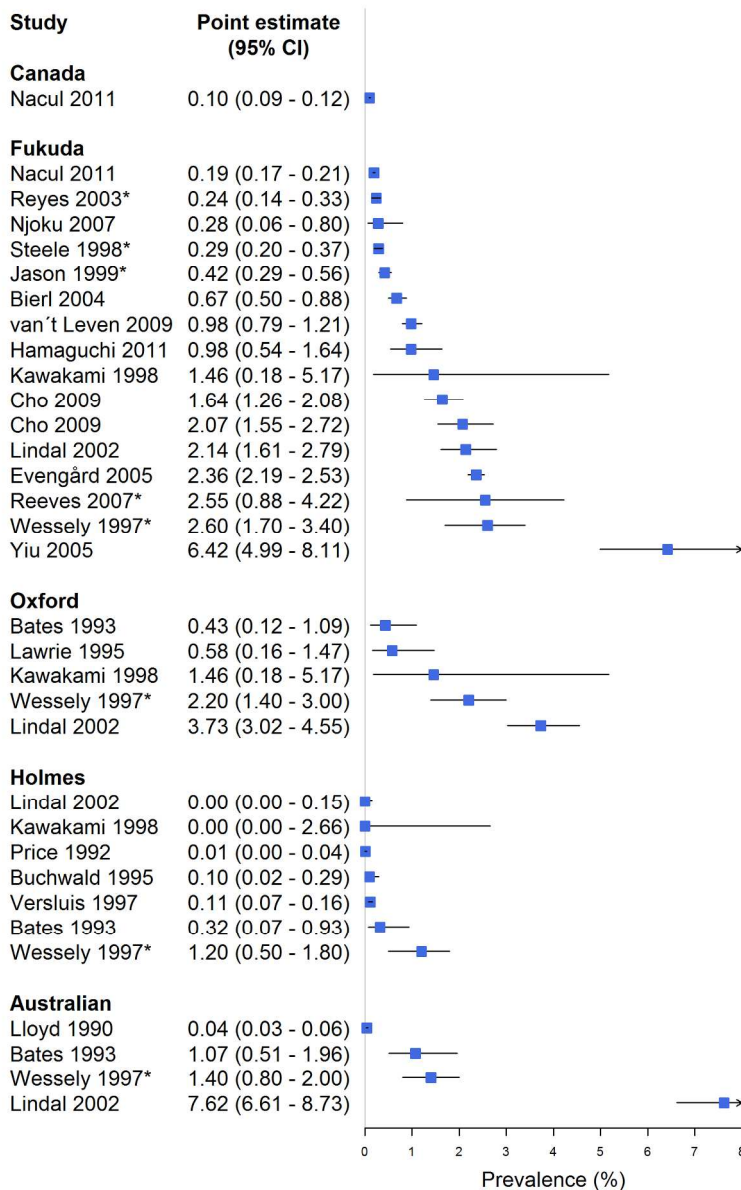

Forest plot summarising indirect comparisons of prevalence estimates from different case definitions with the CDC-1994/Fukuda criteria (Model C). Studies presenting point prevalence weighted for non-response are asterisked (\*)

155x242mm (300 x 300 DPI)

## Appendix 1

### Search strategy CFS/ME Case Definitions

Total search hits: 1559

Search hits after duplet removal: 1015

AMED, EMBASE, MEDLINE, PsycINFO

Date: 24.1.2012

Total search hits: 1517

All the sources were search in Ovid simultaneously

Ovid AMED (Allied and Complementary Medicine) 1985 to January 2012 Search hits: 163

Ovid EMBASE 1980 to 2012 Week 03 Search hits: 776

Ovid MEDLINE In-Process & Other Non-Indexed Citations and Ovid MEDLINE 1946 to Present Search hits: 341

Ovid PsycINFO 1887 to January Week 3 2012 Search hits: 237

1. Fatigue Syndrome, Chronic/

2. (chronic fatigue\* or fatigue syndrome\* or infectious mononucleos\* or postviral fatigue syndrome\* or myalgic encephalo\* or CFIDS or CFS\* or (chronic adj4 mononucleos\*) or post infectious encephalo\* or PVFS).tw.

3. 1 or 2

4. "diagnostic techniques and procedures"/

5. guideline/ or practice guideline/

6. (diagnostic procedure\* or diagnostic technique\* or diagnostic criteria or diagnostic definition or clinical definition or consensus definition or consensus criteria or case definition or clinical Guideline or clinical recommendation or clinical assessment or diagnostics).tw.

7. 4 or 5 or 6

8. 3 and 7

9. 8 use prnz

10. chronic fatigue syndrome/

11. (chronic fatigue\* or fatigue syndrome\* or infectious mononucleos\* or postviral fatigue syndrome\* or myalgic encephalo\* or CFIDS or CFS\* or (chronic adj4 mononucleos\*) or post infectious encephalo\* or PVFS).tw.

12. 10 or 11

13. diagnostic procedure/ or diagnostic test/ or physical examination/

1  
2  
3 14. (diagnostic procedure\* or diagnostic technique\* or diagnostic criteria or diagnostic definition  
4 or clinical definition or consensus definition or consensus criteria or case definition or clinical  
5 Guideline or clinical recommendation or clinical assessment or diagnostics).tw.  
6

7 15. 13 or 14  
8

9 16. 12 and 15  
10

11 17. 16 use emez  
12

13 18. fatigue syndrome chronic/  
14

15 19. (chronic fatigue\* or fatigue syndrome\* or infectious mononucleos\* or postviral fatigue  
16 syndrome\* or myalgic encephalo\* or CFIDS or CFS\* or (chronic adj4 mononucleos\*) or post  
17 infectious encephalo\* or PVFS).tw.  
18

19 20. 18 or 19  
20

21 21. "diagnostic techniques and procedures"/ or patient assessment/ or physical examination/  
22

23 22. (diagnostic procedure\* or diagnostic technique\* or diagnostic criteria or diagnostic definition  
24 or clinical definition or consensus definition or consensus criteria or case definition or clinical  
25 Guideline or clinical recommendation or clinical assessment or diagnostics).tw.  
26

27 23. 21 or 22  
28

29 24. 20 and 23  
30

31 25. 24 use amed  
32

33 26. exp Chronic Fatigue Syndrome/  
34

35 27. (chronic fatigue\* or fatigue syndrome\* or infectious mononucleos\* or postviral fatigue  
36 syndrome\* or myalgic encephalo\* or CFIDS or CFS\* or (chronic adj4 mononucleos\*) or post  
37 infectious encephalo\* or PVFS).tw.  
38

39 28. 26 or 27  
40

41 29. medical diagnosis/ or diagnosis/ or physical examination/  
42

43 30. (diagnostic procedure\* or diagnostic technique\* or diagnostic criteria or diagnostic definition  
44 or clinical definition or consensus definition or consensus criteria or case definition or clinical  
45 Guideline or clinical recommendation or clinical assessment or diagnostics).tw.  
46

47 31. 29 or 30  
48

49 32. 28 and 31  
50

51 33. 32 use psyf  
52

53 34. 9 or 17 or 25 or 33  
54

55 35. remove duplicates from 34  
56

57 CINAHL  
58

59 Date: 24.1.2012  
60

Total search hits: 22

- 1  
2  
3 S6 S3 and S4 Limiters - Exclude MEDLINE records  
4  
5 S5 S3 and S4  
6  
7 S4 S1 or S2  
8  
9 S3 TI (diagnostic procedure\* or diagnostic technique\* or diagnostic criteria or diagnostic  
10 definition or clinical definition or consensus definition or consensus criteria or case  
11 definition or clinical Guideline or clinical recommendation or clinical assessment or  
12 diagnostics) OR AB (diagnostic procedure\* or diagnostic technique\* or diagnostic  
13 criteria or diagnostic definition or clinical definition or consensus definition or consensus  
14 criteria or case definition or clinical Guideline or clinical recommendation or clinical  
15 assessment or diagnostics)  
16  
17 S2 TI (chronic fatigue\* or fatigue syndrome\* or infectious mononucleos\* or postviral  
18 fatigue syndrome\* or myalgic encephalo\* or CFIDS or CFS\* or post infectious  
19 encephalo\* or PVFS ) OR AB ( chronic fatigue\* or fatigue syndrome\* or infectious  
20 mononucleos\* or postviral fatigue syndrome\* or myalgic encephalo\* or CFIDS or  
21 CFS\* or post infectious encephalo\* or PVFS)  
22  
23 S1 (MH "Fatigue Syndrome, Chronic")  
24  
25  
26

27 PEDro

28 Date: 20.1.2012

29 Total search hits: 20

30 Search phrases and words: chronic fatigue syndrome and diagnos\*  
31  
32  
33  
34  
35  
36  
37  
38  
39  
40  
41  
42  
43  
44  
45  
46  
47  
48  
49  
50  
51  
52  
53  
54  
55  
56  
57  
58  
59  
60

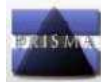

# PRISMA 2009 Checklist

| Section/topic                      | #  | Checklist item                                                                                                                                                                                                                                                                                              | Reported on page # |
|------------------------------------|----|-------------------------------------------------------------------------------------------------------------------------------------------------------------------------------------------------------------------------------------------------------------------------------------------------------------|--------------------|
| <b>TITLE</b>                       |    |                                                                                                                                                                                                                                                                                                             |                    |
| Title                              | 1  | Identify the report as a systematic review, meta-analysis, or both.                                                                                                                                                                                                                                         | 1,2                |
| <b>ABSTRACT</b>                    |    |                                                                                                                                                                                                                                                                                                             |                    |
| Structured summary                 | 2  | Provide a structured summary including, as applicable: background; objectives; data sources; study eligibility criteria, participants, and interventions; study appraisal and synthesis methods; results; limitations; conclusions and implications of key findings; systematic review registration number. | 2, 3               |
| <b>INTRODUCTION</b>                |    |                                                                                                                                                                                                                                                                                                             |                    |
| Rationale                          | 3  | Describe the rationale for the review in the context of what is already known.                                                                                                                                                                                                                              | 5, 6               |
| Objectives                         | 4  | Provide an explicit statement of questions being addressed with reference to participants, interventions, comparisons, outcomes, and study design (PICOS).                                                                                                                                                  | 6                  |
| <b>METHODS</b>                     |    |                                                                                                                                                                                                                                                                                                             |                    |
| Protocol and registration          | 5  | Indicate if a review protocol exists, if and where it can be accessed (e.g., Web address), and, if available, provide registration information including registration number.                                                                                                                               | 6                  |
| Eligibility criteria               | 6  | Specify study characteristics (e.g., PICOS, length of follow-up) and report characteristics (e.g., years considered, language, publication status) used as criteria for eligibility, giving rationale.                                                                                                      | 6                  |
| Information sources                | 7  | Describe all information sources (e.g., databases with dates of coverage, contact with study authors to identify additional studies) in the search and date last searched.                                                                                                                                  | 6                  |
| Search                             | 8  | Present full electronic search strategy for at least one database, including any limits used, such that it could be repeated.                                                                                                                                                                               | 6                  |
| Study selection                    | 9  | State the process for selecting studies (i.e., screening, eligibility, included in systematic review, and, if applicable, included in the meta-analysis).                                                                                                                                                   | 7                  |
| Data collection process            | 10 | Describe method of data extraction from reports (e.g., piloted forms, independently, in duplicate) and any processes for obtaining and confirming data from investigators.                                                                                                                                  | 7                  |
| Data items                         | 11 | List and define all variables for which data were sought (e.g., PICOS, funding sources) and any assumptions and simplifications made.                                                                                                                                                                       | 7                  |
| Risk of bias in individual studies | 12 | Describe methods used for assessing risk of bias of individual studies (including specification of whether this was done at the study or outcome level), and how this information is to be used in any data synthesis.                                                                                      | 8                  |
| Summary measures                   | 13 | State the principal summary measures (e.g., risk ratio, difference in means).                                                                                                                                                                                                                               | NA                 |
| Synthesis of results               | 14 | Describe the methods of handling data and combining results of studies, if done, including measures of consistency (e.g., $I^2$ for each meta-analysis)                                                                                                                                                     | 8                  |



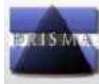

# PRISMA 2009 Checklist

Page 1 of 2

| Section/topic                 | #  | Checklist item                                                                                                                                                                                           | Reported on page # |
|-------------------------------|----|----------------------------------------------------------------------------------------------------------------------------------------------------------------------------------------------------------|--------------------|
| Risk of bias across studies   | 15 | Specify any assessment of risk of bias that may affect the cumulative evidence (e.g., publication bias, selective reporting within studies).                                                             | 7                  |
| Additional analyses           | 16 | Describe methods of additional analyses (e.g., sensitivity or subgroup analyses, meta-regression), if done, indicating which were pre-specified.                                                         | NA                 |
| <b>RESULTS</b>                |    |                                                                                                                                                                                                          |                    |
| Study selection               | 17 | Give numbers of studies screened, assessed for eligibility, and included in the review, with reasons for exclusions at each stage, ideally with a flow diagram.                                          | 8,9                |
| Study characteristics         | 18 | For each study, present characteristics for which data were extracted (e.g., study size, PICOS, follow-up period) and provide the citations.                                                             | Table 1-4          |
| Risk of bias within studies   | 19 | Present data on risk of bias of each study and, if available, any outcome level assessment (see item 12).                                                                                                | NA                 |
| Results of individual studies | 20 | For all outcomes considered (benefits or harms), present, for each study: (a) simple summary data for each intervention group (b) effect estimates and confidence intervals, ideally with a forest plot. | Table 2-4, Fig 5   |
| Synthesis of results          | 21 | Present results of each meta-analysis done, including confidence intervals and measures of consistency.                                                                                                  | NA                 |
| Risk of bias across studies   | 22 | Present results of any assessment of risk of bias across studies (see Item 15).                                                                                                                          | 9,10,11            |
| Additional analysis           | 23 | Give results of additional analyses, if done (e.g., sensitivity or subgroup analyses, meta-regression [see Item 16]).                                                                                    | NA                 |
| <b>DISCUSSION</b>             |    |                                                                                                                                                                                                          |                    |
| Summary of evidence           | 24 | Summarize the main findings including the strength of evidence for each main outcome; consider their relevance to key groups (e.g., healthcare providers, users, and policy makers).                     | 11,12              |
| Limitations                   | 25 | Discuss limitations at study and outcome level (e.g., risk of bias), and at review-level (e.g., incomplete retrieval of identified research, reporting bias).                                            | 12                 |
| Conclusions                   | 26 | Provide a general interpretation of the results in the context of other evidence, and implications for future research.                                                                                  | 16,17              |
| <b>FUNDING</b>                |    |                                                                                                                                                                                                          |                    |
| Funding                       | 27 | Describe sources of funding for the systematic review and other support (e.g., supply of data); role of funders for the systematic review.                                                               | 17                 |

From: Moher D, Liberati A, Tetzlaff J, Altman DG, The PRISMA Group (2009). Preferred Reporting Items for Systematic Reviews and Meta-Analyses: The PRISMA Statement. PLoS Med 6(6): e1000097. doi:10.1371/journal.pmed1000097

For more information, visit: [www.prisma-statement.org](http://www.prisma-statement.org).

For peer review only - <http://bmjopen.bmj.com/site/about/guidelines.xhtml>

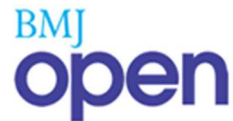

**Case definitions for Chronic Fatigue Syndrome/Myalgic Encephalomyelitis (CFS/ME) - A systematic review**

|                                 |                                                                                                                                                                                                                                                                                                                                                                                                         |
|---------------------------------|---------------------------------------------------------------------------------------------------------------------------------------------------------------------------------------------------------------------------------------------------------------------------------------------------------------------------------------------------------------------------------------------------------|
| Journal:                        | <i>BMJ Open</i>                                                                                                                                                                                                                                                                                                                                                                                         |
| Manuscript ID:                  | bmjopen-2013-003973.R1                                                                                                                                                                                                                                                                                                                                                                                  |
| Article Type:                   | Research                                                                                                                                                                                                                                                                                                                                                                                                |
| Date Submitted by the Author:   | 17-Dec-2013                                                                                                                                                                                                                                                                                                                                                                                             |
| Complete List of Authors:       | Brurberg, Kjetil; Norwegian Knowledge Centre for the Health Services, Primary Health Unit<br>Fønhus, Marita; Norwegian Knowledge Centre for the Health Services, Larun, Lillebeth; Norwegian Knowledge Centre for the Health Services, Flottorp, Signe; Norwegian Knowledge Centre for the Health Services, Malterud, Kirsti; University of Bergen, Department of Global Public Health and Primary Care |
| <b>Primary Subject Heading</b>: | Diagnostics                                                                                                                                                                                                                                                                                                                                                                                             |
| Secondary Subject Heading:      | Epidemiology, Evidence based practice                                                                                                                                                                                                                                                                                                                                                                   |
| Keywords:                       | EPIDEMIOLOGY, PRIMARY CARE, STATISTICS & RESEARCH METHODS                                                                                                                                                                                                                                                                                                                                               |
|                                 |                                                                                                                                                                                                                                                                                                                                                                                                         |

SCHOLARONE™  
Manuscripts

1  
2  
3  
4  
5  
6 **Case definitions for Chronic Fatigue Syndrome/Myalgic Encephalomyelitis**  
7 **(CFS/ME) - A systematic review**  
8  
9

10  
11 Kjetil Gundro Brurberg PhD <sup>1</sup>, Marita Sporstøl Fønhus PhD <sup>1</sup>, Lillebeth Larun PT PhD <sup>1</sup>,  
12 Signe Flottorp MD PhD <sup>1,2</sup>, Kirsti Malterud MD PhD <sup>3,4,5</sup>  
13  
14  
15

16  
17  
18 <sup>1</sup> Norwegian Knowledge Centre for the Health Services, NO-0130 Oslo, Norway  
19

20  
21 <sup>2</sup> Institute of Health and Society, University of Oslo, NO-0318 Oslo, Norway  
22

23 <sup>3</sup> Department of Global Public Health and Primary Care, University of Bergen, NO-5020  
24 Bergen, Norway  
25

26  
27 <sup>4</sup> Research Unit for General Practice, Uni Health, Uni Research, NO-5008 Bergen,  
28 Norway  
29

30  
31 <sup>5</sup> Research Unit for General Practice in Copenhagen, DK-1014 Copenhagen K, Denmark  
32  
33  
34  
35

36 **Correspondence to:** KG Brurberg kgb@kunnskapsenteret.no  
37  
38  
39

40 **Word count:** 4083 (excluding title page, abstract, references, boxes, tables and figures)  
41

42 **Numbers of tables and numbers of figures:** 4 tables and 5 figures  
43  
44

45 **Keywords:** Chronic fatigue syndrome, diagnosis, criteria, case definition  
46  
47  
48  
49  
50  
51  
52  
53  
54  
55  
56  
57  
58  
59  
60

## Abstract

**Objective:** To identify case definitions for Chronic Fatigue Syndrome/Myalgic Encephalomyelitis (CFS/ME), and explore how the validity of case definitions can be evaluated in the absence of a reference standard.

**Design:** Systematic review.

**Setting:** International.

**Participants:** A literature search, updated as of November 2013, led to identification of 20 case definitions and inclusion of 38 validation studies.

**Primary and secondary outcome measure:** Validation studies were assessed for risk of bias and categorised according to three validation models: A) independent application of several case definitions on the same population, B) sequential application of different case definitions on patients diagnosed with CFS/ME with one set of diagnostic criteria, or C) comparison of prevalence estimates from different case definitions applied on different populations.

**Results:** A total of 38 studies contributed data of sufficient quality and consistency for evaluation of validity, with CDC-1994/Fukuda as the most frequently applied case definition. No study rigorously assessed reproducibility or feasibility of case definitions. Validation studies were small with methodological weaknesses and inconsistent results. No empirical data indicated that any case definition specifically identified patients with a neuroimmunological condition.

**Conclusions:** Classification of patients according to severity and symptom patterns, aiming to predict prognosis or effectiveness of therapy, seems useful. Development of further case definitions of CFS/ME should be given low priority. Consistency in research can be achieved by applying diagnostic criteria that have been subjected to systematic evaluation.

## Article summary

### Article focus

- Several case definitions for Chronic Fatigue Syndrome/Myalgic Encephalomyelitis (CFS/ME) exist, but there is no general agreement on a reference standard for diagnosis.
- This study aims to identify and compare case definitions for CFS/ME.
- We also explore how accuracy and validity of the case definitions can be evaluated in the absence of a reference standard.

### Key messages

- None of the included studies rigorously assessed the reproducibility or feasibility of existing case definitions.
- Only one included study reported data in a way that made it possible to compare different case definitions rigorously and directly.
- We found no empirical evidence supporting the hypothesis that some case definitions more specifically identify patients with a neuroimmunological condition.

### Strengths and limitations of this study

- The main strength of our study is the systematic methods used to identify and appraise articles presenting and evaluating case definitions of CFS/ME.
- We used systematic and transparent approaches to extract data, categorise the studies according to pre-specified models, and to analyse and compare the data.
- The included validation studies showed considerable methodological weaknesses and inconsistent results, and it is therefore difficult to draw firm conclusions.

## Introduction

Chronic fatigue syndrome (CFS) is a serious disorder characterised by persistent post-exertional fatigue and substantial symptoms related to cognitive, immune and autonomous dysfunction<sup>1,2</sup>. Disease mechanisms are complex<sup>3</sup>, with no single causal factor identified. Yet there are indications that infections<sup>4-8</sup> and immunologic dysfunction<sup>9</sup> contribute to development and maintenance of symptoms, probably interacting with genetic<sup>10</sup> and psychosocial<sup>11-13</sup> factors.

Studies have identified pathological patterns and structures of the central nervous system<sup>14;15</sup>, dysregulation of body temperature and blood pressure<sup>16;17</sup>, and dysfunctional stress hormonal systems<sup>18;19</sup> in CFS patients compared to normal controls. None of these appears sufficiently consistent to constitute a diagnostic test, and case definitions (diagnostic criteria) are therefore used to define the CFS diagnosis. When case definitions are developed, the context of application must be considered, since different properties are needed for case definition intended for research purposes compared to case definitions used to diagnose individual patients. It is also necessary to consider whether a broad (i.e. sensitive criteria ensuring that we do not miss relevant cases) or narrow (i.e. specific criteria ensuring that all positive cases are definite) approach is most appropriate.

Holmes et al<sup>20</sup> coined the term “Chronic Fatigue Syndrome” in 1988, as an alternative to “The chronic Epstein-Barr virus syndrome”. Since this case definition - the CDC-1988/Holmes Criteria - was presented in 1988<sup>20</sup>, numerous revisions have been developed, aiming for distinctive and reliable identification of individuals who represent a homogenous and consistent phenotype of the hypothesized disease entity, consistent with pathophysiological and psychosocial findings. Today the term “Myalgic Encephalomyelitis” (ME) is commonly used to conceptualize a specific neuroimmunological condition, assumed to be more severe and less psychologically attributed than CFS<sup>21</sup>. In 2003, Carruthers et al presented the Canadian-2003 Criteria for diagnosis of Myalgic Encephalomyelitis/Chronic Fatigue Syndrome<sup>22</sup>. A revised version was presented as International Consensus Criteria (the ICC-2011 Criteria) for Myalgic Encephalomyelitis<sup>23</sup>, claiming to be a selective case definition for identification of patients with neuroimmune exhaustion with a pathologically low threshold of fatigability

1  
2  
3 and symptom flare after exertion. The assertion that CFS and ME are different clinical  
4 entities is disputed. Below, we will pragmatically apply the term CFS/ME.  
5  
6

7 Johnston et al conducted a systematic review of the adoption of CFS/ME case definitions  
8 to assess prevalence and identified eight different case definitions<sup>24</sup>. There is no general  
9 agreement on a reference standard for diagnosis, and no diagnostic test is available.  
10  
11

12 Bossuyt et al. include case definitions in their understanding of the term “test”,  
13 emphasizing that diagnostic tests are highly dynamic and need rigorous evaluation before  
14 they are introduced into clinical practice<sup>25;26</sup>.  
15  
16

17 The objectives of our study were to explore strategies for evaluation of accuracy and  
18 concept validity of different case definitions for CFS/ME in the absence of a reference  
19 standard. First, we wanted to conduct a systematic review to identify and describe  
20 different case definitions (sets of diagnostic criteria) for CFS/ME. Second, we wanted to  
21 explore differences between various case definitions by identifying and reviewing  
22 validation studies.  
23  
24  
25  
26  
27  
28

## 29 30 31 **Method and material**

### 32 *Protocol and registration*

33  
34 We developed a protocol for our study. However, we did not publish or register it.  
35  
36  
37  
38  
39

### 40 *Eligibility criteria*

41 We included studies presenting or validating case definitions for CFS/ME for adult  
42 populations (>18 years). No language restrictions were employed.  
43  
44  
45  
46  
47  
48

### 49 *Information sources and search*

50 We searched Ovid MEDLINE and Ovid MEDLINE In-Process & Other Non-Indexed  
51 Citations from 1946, Ovid EMBASE from 1980, Ovid PsycINFO from 1806, Ovid  
52 AMED from 1985, The Cochrane Library from 1898, CINAHL from 1981, and PEDRO  
53 from 1929 using subject headings and text words (Appendix 1). All searches were up to  
54  
55  
56  
57  
58  
59  
60

1  
2  
3  
4  
5  
6  
7  
8  
9  
10  
11  
12  
13  
14  
15  
16  
17  
18  
19  
20  
21  
22  
23  
24  
25  
26  
27  
28  
29  
30  
31  
32  
33  
34  
35  
36  
37  
38  
39  
40  
41  
42  
43  
44  
45  
46  
47  
48  
49  
50  
51  
52  
53  
54  
55  
56  
57  
58  
59  
60

date as of 25. November 2013. We checked the reference lists of all included articles and searched for unpublished and on-going studies by correspondence with authors and field experts.

### *Study selection*

To select publications eligible for this review, two authors independently read all titles and abstracts in the records retrieved by the searches. We obtained publications in full text if the abstract was deemed eligible by at least one review author. At least two authors independently read the full text papers and selected studies according to the inclusion criteria. Any disagreement between review authors was resolved by discussion between the two review authors or, if necessary, by involving all authors.

### *Data collection process*

First, we listed all the identified *case definitions for CFS/ME*. One author gathered information about citation from ISI and Google Scholar to indicate the impact or widespread of use, but we made no attempt to assess or rank the quality of the case definitions at this stage.

To facilitate the validity assessment, we developed a framework consisting of three different models:

Model A includes studies with *independent application of different case definitions on the same population* (Figure 1). This model presents the interrelationship between subpopulations identified by the different case definitions.

<Insert Figure 1 about here>

Model B includes studies where patients diagnosed with CFS/ME with *one set of diagnostic criteria are diagnosed sequentially with other case definitions* assumed to have increasing specificity (Figure 2).

<Insert Figure 2 about here>



1  
2  
3 Model C includes surveys or cross-sectional studies estimating the *prevalence* of  
4 CFS/ME by applying different case definitions on different populations (Figure 3). These  
5 studies do not directly compare different case definitions, but may be used for proxy  
6 evaluation, similar to the strategy applied by Johnston et al <sup>24;27</sup>.  
7  
8  
9

10  
11 <Insert figure 3 about here>  
12

13 Two authors reviewed all potentially relevant *validations studies*, and categorised them  
14 according to Model A, B or C. Any disagreement between review authors at this stage  
15 was resolved by reaching consensus in the author group.  
16  
17  
18

### 19 20 21 *Risk of bias in individual studies* 22

23 To differentiate between studies with higher and lower risk of bias, we critically  
24 appraised all included validation studies according to check lists: Studies comparing two  
25 or more case definitions directly (i.e. Model A or B) were appraised according to the  
26 QUADAS-criteria <sup>28</sup> (patient selection, index test, reference standard, flow, and timing).  
27 For evaluation of prevalence studies (i.e. Model C) we used an outline for assessment of  
28 external and internal validity (11 items) of prevalence studies <sup>29</sup>.  
29  
30  
31  
32  
33  
34  
35  
36

### 37 *Analysis* 38

39 Participation in prevalence studies, surveys, and questionnaires vary across the included  
40 studies. Non-response is known to introduce bias, and methods to adjust for low response  
41 rates are available <sup>30</sup>. In studies affected by non-response, we have reported adjusted  
42 estimates whenever applicable. If adjusted estimates were unavailable, we have defined  
43 the proportion as the number of cases divided by the number of responders. We estimated  
44 95% confidence intervals for all proportions by using the Clopper-Pearson exact binomial  
45 method. We used R software version 3.0.0 and the rmeta package for statistical  
46 computations and plotting <sup>31;32</sup>.  
47  
48  
49  
50  
51  
52  
53  
54  
55

## 56 **Results** 57 58 59 60

### *Study selection*

Our systematic literature search identified 1660 unique references, of which 56 articles fulfilled our inclusion criteria (Figure 4). Twenty articles present different *case definitions* of CFS/ME for research or clinical practice<sup>20;22;23;33-49</sup> (Table 1). Furthermore, 38 studies were classified as *validation studies*, contributing data of sufficient quality and consistency for evaluation of different case definitions according to our inclusion criteria.

< Insert Table 1 and Figure 4 about here >

The degree to which the different case definitions had been applied in research and clinical guidelines varied widely, with CDC-1994/Fukuda<sup>39</sup> as the most frequently cited case definition of CFS/ME.

Thirteen of the 20 identified case definitions had been assessed in one or more validation study<sup>20;22;23;33;34;36;37;39-41;43;44;47</sup>. For seven case definitions, no foundation for validation could be identified. We did not identify any study which rigorously assessed the reproducibility or feasibility of the different case definitions.

### *Independent application of several case definitions on the same population (Model A)*

Five studies (Table 2) applied several case definitions on the same population, but only one of these reported data in a way that made it possible to compare the case definitions<sup>50;51</sup>. Nacul et al<sup>50</sup> used GP databases and questionnaires and identified 278 patients with unexplained chronic fatigue conforming to one or more of the case definition applied, i.e. CDC-1994/Fukuda<sup>39</sup>, Canadian-2003<sup>22</sup> or ECD-2008<sup>34</sup>. Most of the patients who were positive according to the Canada-criteria [C+] were also positive using the Fukuda criteria [F+]. 47% of the Fukuda positive patients were also positive according to the Canada criteria. Patients who were positive to both the Canada and Fukuda [C+/F+] reported a higher level of symptoms than those who were [F+/C-]. The authors did not identify differences in the distribution of triggering factors<sup>50</sup>.

< Insert Table 2 about here >

None of the other four studies in this group reported data on the correlation between case definitions, patient profile, and symptom burden. Application of CDC-1988/Holmes case definition was consistently associated with lower prevalence estimates than CDC-1994/Fukuda, Oxford-1991, and Australian-1990 criteria across these four studies. There was no consistent trend for the other case definitions, but the studies were heterogeneous regarding the application of different case definitions and data collection (Table 2). This observation suggests that prevalence numbers obtained by different case definitions should be controlled according to diagnostic procedure, cut-off points and reasons for exclusions before concluding upon differences.

*Different case definitions with assumed increasing specificity applied sequentially on the same population (Model B)*

Twelve studies (Table 3) sequentially applied different case definitions on the same population. In these studies, patients were screened by the use of an evaluation standard. Subsequently, test-positive individuals were screened with one or more comparators. Nine of the twelve studies applied CDC-1994/Fukuda as the evaluation standard, and then tested Fukuda-positive patients with CDC-1988/Holmes, Canadian-2003, ICC-2011, ME-2011, Empirical-2006/Reeves, London-1990/Dowsett, or Neurasthenia case definitions.

< Insert Table 3 about here >

We have taken the actual evaluation standard as a point of departure, and calculated the proportion of these patients still positive when applying other case definitions. Since there are no test negatives for the case definition used as point of departure, true sensitivities or specificities cannot be calculated. Results from two of the studies by Jason et al.<sup>33,52</sup> suggest that 40-70% of the Fukuda positive patients are also Canada positives [F+/C+]. One study<sup>52</sup> concluded that there was less psychiatric co-morbidity and more physical functional impairment in the sub-sample which was positive on both case definitions [F+/C+] than those who were negative according to the Canada criteria [F+/C-]. However, the other study<sup>33</sup> suggested a higher incidence of mental and cognitive problems among Fukuda positive patients who were also Canada positive [F+/C+] as

1  
2  
3 compared to the remaining Fukuda positive but Canada negative patients [F+/C-]. In a  
4 separate publication<sup>53</sup>, the same Fukuda positive patients as referred in Jason 2012<sup>33</sup>  
5 were used to contrast ICC-2011. About 34% (95% CI 26%-44%) of the Fukuda positive  
6 patients were also ICC positives [F+/ICC+]. Similar to the [F+/C+] subset, it was found  
7 that [F+/ICC+] patients experienced more functional impairments as well as more mental  
8 and cognitive problems and higher psychiatric comorbidity than [F+/ICC-] patient.  
9

10  
11  
12  
13  
14 The comparisons presented in table 3 are associated with high risk of bias as well as  
15 random errors, and the results should be interpreted with great caution. For example, two  
16 of the included studies reported similar point prevalence according to CDC-1994/Fukuda  
17 (2.1% and 2.6%) but reported very different estimates using the Australian-1990 criteria  
18 (7.6% and 1.4%)<sup>54,55</sup>. Sometimes diagnoses were based on questionnaire responses only,  
19 sometimes following detailed clinical interviews and laboratory testing. There were also  
20 differences in the way similar case definitions were practiced in the various studies, e.g.  
21 some studies applied a low threshold for exclusion of cases with psychiatric comorbidity,  
22 while others did not.  
23  
24  
25  
26  
27  
28  
29  
30  
31  
32

33  
34 *Indirect comparisons of prevalence estimates from several case definitions applied on*  
35 *different populations (Model C)*  
36

37 We identified 21 studies (Table 4) presenting prevalence estimates for CFS/ME (Figure  
38 3), in addition to the five studies presenting prevalence estimates following the  
39 application of multiple case definitions (Table 2). Based on these studies, we extracted 17  
40 independent estimates of the prevalence following application of the CDC-1994/Fukuda  
41 criteria (Figure 5).  
42  
43  
44  
45

46  
47 < Insert Table 4 about here >  
48

49 Our analysis suggests that the population prevalence of CFS/ME according to the CDC-  
50 1994/Fukuda case definition probably is less than 1% (range 0.1 to 6.4%; median 1.0%),  
51 with higher prevalence among consecutive GP-attendants than from population studies.  
52 Prevalence estimates seemed higher when patients were diagnosed without a preceding  
53 medical examination. Prevalence estimates of CFS/ME according to CDC-1988/Holmes  
54  
55  
56  
57  
58  
59  
60

1  
2  
3 case definition seemed lower, with all the studies reporting prevalence estimates ranging  
4 from 0.0 to 0.3% (median 0.05%).  
5

6  
7 Five studies<sup>54-58</sup> reported CFS/ME prevalence estimates according to the Oxford-1991  
8 case definition. These estimates ranged from 0.4% - 3.7% (median 1.5%). Four studies  
9  
10 44;54-56 reported prevalence estimates according to the Australian-1990 case definition  
11 ranging from 0.04% - 7.6% (median 1.2%).  
12  
13

## 14 15 16 17 **Discussion**

18  
19 We identified 20 studies presenting different CFS/ME case definitions, and 38 studies  
20 with data providing access to comparison and evaluation of some of these. Only a  
21 minority of existing case definitions had been submitted to comparative evaluations. The  
22 validation studies were methodologically weak and heterogeneous, making it  
23 questionable to compare the case definitions. The most cited case definition (CDC-  
24 1994/Fukuda<sup>39</sup>) is also the most extensively validated one, whereas validation studies are  
25 few (Canadian-2003<sup>22</sup>, ICC-2011<sup>23</sup>) or missing (NICE-2007<sup>46</sup>) for more recently  
26 presented and debated case definitions. We found no empirical evidence supporting the  
27 hypothesis that some case definitions more specifically identify patients with a  
28 neuroimmunological condition.  
29  
30  
31  
32  
33  
34  
35  
36  
37  
38  
39

### 40 *Strengths and weaknesses of our study*

41  
42 The main strength of our study is the systematic methods used to identify and appraise  
43 articles presenting case definitions of CFS/ME and studies potentially useful to evaluate  
44 the case definitions. Furthermore, we have used systematic and transparent approaches to  
45 extract data from the validation studies, categorise the studies according to three different  
46 models, and to analyse and compare the data.  
47  
48  
49  
50

51  
52 The STARD initiative aims to improve the reporting on studies of diagnostic accuracy,  
53 considering any method for obtaining additional information on a patient's health status  
54 as a test<sup>25</sup>. Due to the lack of a reference standard, we found this guideline less suitable  
55 for review of articles evaluating case definitions for CFS/ME. Still, issues such as study  
56  
57  
58  
59  
60

1  
2  
3  
4  
5  
6  
7  
8  
9  
10  
11  
12  
13  
14  
15  
16  
17  
18  
19  
20  
21  
22  
23  
24  
25  
26  
27  
28  
29  
30  
31  
32  
33  
34  
35  
36  
37  
38  
39  
40  
41  
42  
43  
44  
45  
46  
47  
48  
49  
50  
51  
52  
53  
54  
55  
56  
57  
58  
59  
60

populations, test methods and rationale, technical specifications for application of the test, statistical methods for comparing measures of accuracy and uncertainty, estimates of diagnostic accuracy, variability, and clinical applicability<sup>25</sup> are relevant also for our analysis.

The validation studies we identified were small with considerable methodological weaknesses and inconsistent results. Only one study held a level of rigor where independent application of several case definitions was conducted on the same population (Model A)<sup>50</sup>. Such a study should ideally be based on a population sample rather than a GP practice database, and should compare a selection of currently applied and debated case definitions, such as CDC-1994/Fukuda, Oxford-1991, Canadian-2003 and NICE-2007.

The QUADAS-criteria<sup>28</sup> demonstrate that Model B is an evaluation strategy prone to several sources of bias. First, the spectrum of patients subjected to the comparator is selected and not representative of the population receiving the test if it is used alone. Second, as comparators were mostly applied subsequently to the evaluation standard, the clinical evaluations were not independent. The estimates from two of the Jason studies<sup>33;52</sup> suggest a comparable correspondence (40-70% of the F+ are also C+) with the results presented by Nacul and co-workers<sup>50</sup>. Yet, Model B gives no or limited information regarding those who screened negative in the first place. We do not know if some of those might have had a positive diagnosis if screened with one of the other case definitions.

We are even more prone to bias when exploring the consistency of different case definitions through indirect comparisons of prevalence estimates obtained from different populations (Model C), and great caution is needed when such proxy comparisons are undertaken. For example, two of the included studies reported similar point prevalence according to CDC-1994/Fukuda (2.1% and 2.6%), but reported very different estimates following the application of the Australian-1990 criteria (7.6% and 1.4%)<sup>54;55</sup>. This inconsistency can be explained by major methodological differences seen across the included studies. Our sample includes studies in which a diagnosis of CFS/ME is made on the basis on either questionnaire responses or clinical interview. Previous studies

1  
2  
3 suggest that patients who receive a standardised questionnaire report considerable more  
4 symptoms than when asked to report their symptoms spontaneously<sup>59</sup>. There are several  
5 other sources to this between study heterogeneity, such as recruitment strategy, response  
6 rate and strategies for non-response adjustment. We were not able to identify the most  
7 important one. However, Johnston et al performed interesting subgroup analysis in their  
8 meta-analysis of 14 studies applying the CDC-1994/Fukuda case definition, and found  
9 that the pooled prevalence for self-reporting assessment was 3.28% (95% CI: 2.24–4.33)  
10 compared to 0.76% (95% CI: 0.23–1.29) for clinical assessment<sup>27</sup>. Prevalence was lower  
11 in community samples (0.87%; 0.32–1.42) than in primary care samples (1.72%; 1.40–  
12 2.04). The prevalence estimates based on self-reports showed high variability, while  
13 clinically assessed estimates were more consistent, especially in the community samples.  
14  
15  
16  
17  
18  
19  
20  
21  
22  
23

#### 24 25 26 *The utility of case definitions and diagnoses*

27  
28 The utility of a diagnosis is linked to the potential effects of being diagnosed (e.g.  
29 benefits and harms of the patient role, access to treatment and insurance). More  
30 important, a diagnosis is useful if it is linked to valid information regarding prognosis or  
31 outcomes of therapy. Reitsma et al suggest clinical test validation as an alternative  
32 paradigm for evaluation of a diagnostic test when an acceptable reference standard is  
33 missing<sup>26</sup>. Hence, primary studies and systematic reviews on prognosis and therapy are  
34 alternative sources to evaluate the usefulness of different case definitions of CFS/ME. We  
35 have identified only one such publication, the PACE trial<sup>60</sup>. Here, participants were  
36 diagnosed according to the Oxford-1991 criteria, Empirical criteria-2007/Reeves and  
37 London ME-1994/National Task Force criteria, and then randomised to either standard  
38 medical treatment, graded exercise therapy, cognitive behaviour therapy or pacing. The  
39 results showed that the effectiveness of the treatments was similar across groups,  
40 irrespective of the case definition which had been used. Fluge et al applied the CDC-  
41 1994/Fukuda and retrospectively added the Canada criteria in their study on the effects of  
42 rituximab in CFS with comparable results<sup>9</sup>. In a recent publication, Maes et al measured  
43 symptom severity, selected biomarkers and post-exertional malaise in 144 patients with  
44 chronic fatigue (CF), of whom 107 fulfilled the CDC-1994/Fukuda criteria of CFS/ME<sup>21</sup>.  
45  
46  
47  
48  
49  
50  
51  
52  
53  
54  
55  
56  
57  
58  
59  
60



1  
2  
3 They claimed that CF, CFS and ME are distinct categories, although stating that patients  
4 group together in one continuum with no clear boundaries between them<sup>21</sup>. Such studies  
5 would be even more useful if outcomes of specific treatment modes had also been tested.  
6  
7

8  
9 A study comparing the prognosis of different diagnostic labels of fatigue found that  
10 patients with ME had the worst prognosis while patients with post-viral fatigue syndrome  
11 had the best<sup>61</sup>. This could mean that the patients destined to the worst prognosis were  
12 labelled with the ME diagnosis, or it might be explained as an adverse effect of being  
13 labelled with ME. The authors found no significant difference in recorded fatigue before  
14 the diagnosis of CFS and ME, and the data in this retrospective study supported the  
15 hypothesis of the labeling effect. Another study found that patients who attributed their  
16 fatigue to ME were more fatigued and more handicapped in relation to home, work,  
17 social and private leisure activities than patients who attributed their fatigue to  
18 psychological or social factors<sup>62</sup>.  
19  
20  
21  
22  
23  
24  
25  
26  
27  
28  
29

### 30 *Broad or narrow case definitions?*

31  
32 Ideally, correspondence validity between test and target should be 100% for *sensitivity*  
33 (the capacity to identify patients in the target group) and *specificity* (the capacity to rule  
34 out patients that do not belong to the target group). More often, there is a trade-off  
35 between these measures, depending on the purpose of diagnosis. Emphasizing sensitivity  
36 implies a risk of over-diagnosis, which dilutes the actual diagnostic concept, while  
37 emphasizing specificity implies a risk of under-diagnosis, dismissing patients who might  
38 benefit from treatment. Development of more exclusive case definitions for CFS/ME has  
39 been proposed, claiming that existing case definitions do not select homogenous sets of  
40 patients<sup>23</sup>. More specifically, Oxford-1991, Fukuda-1994 and NICE-2007 have been  
41 criticised, especially by patient organizations, for undue overlap with psychopathology.  
42 Proponents of recent case definitions such as Canada-2003 and ICC-2011, claim to  
43 achieve a narrow selection of patients with ME conforming to a hypothesized specific  
44 pathophysiology. Our review demonstrates, however, that these case definitions do not  
45 necessarily exclude patients with psychopathology.  
46  
47  
48  
49  
50  
51  
52  
53  
54  
55  
56  
57  
58  
59  
60



1  
2  
3 A lesson could be learnt from Reeves, who tried to elaborate the CDC1994/Fukuda  
4 definition and bring methodological rigor into the diagnostic criteria by scores from  
5 standardized and validated instruments<sup>63</sup>. The Empirical-2006/Reeves case definition led  
6 to a tenfold prevalence estimate as compared with the CDC1994/Fukuda definition<sup>64</sup>,  
7 probably due to misclassification and inclusion of patients with major depressive disorder  
8  
9  
10  
11  
12  
13  
14  
15  
16  
17  
18  
19  
20  
21  
22  
23  
24  
25  
26  
27  
28  
29  
30  
31  
32  
33  
34  
35  
36  
37  
38  
39  
40  
41  
42  
43  
44  
45  
46  
47  
48  
49  
50  
51  
52  
53  
54  
55  
56  
57  
58  
59  
60

A lesson could be learnt from Reeves, who tried to elaborate the CDC1994/Fukuda definition and bring methodological rigor into the diagnostic criteria by scores from standardized and validated instruments<sup>63</sup>. The Empirical-2006/Reeves case definition led to a tenfold prevalence estimate as compared with the CDC1994/Fukuda definition<sup>64</sup>, probably due to misclassification and inclusion of patients with major depressive disorder<sup>65</sup>. The purpose of rigor had not been achieved, and the Empirical-2006/Reeves case definition was never broadly implemented. According to our review, it is uncertain whether a more homogenous subset of patients can be achieved with the Canada-2003 and ICC-2011 case definitions. The authors of the latter paper write: “Collectively, members have approximately 400 years of both clinical and teaching experience, authored hundreds of peer-reviewed publications, diagnosed or treated approximately 50 000 patients with ME, and several members co-authored previous criteria.”<sup>23</sup>. This declaration is no validity criterion and provides no guarantee that the case definition works according to the intentions.

### *Case definitions for research or clinical practice?*

*Research* requires uniform and reproducible criteria, suitable for unambiguous definitions of the target population. Another concern is to compare studies across time and nations. These are arguments for an inclusive case definition, preferably one which has been in use for a while, and for which validation studies are available. In CFS/ME research, the Oxford-1991 and CDC-1994/Fukuda are the most frequently used case definitions. Our review indicates that the former might be more inclusive, with lower specificity than the latter, although the impact of this is unclear. Proponents for more restrictive case definitions dismiss findings from treatment studies documenting effects of cognitive behavioural treatment or graded exercise therapy for patients diagnosed with the Oxford-1991 or CDC-1994/Fukuda case definitions<sup>66</sup>. Their claim is that for a more exclusive selection of patients with ME, defined according to specific hypothesized pathophysiology, the side effects of these treatment modalities are hazardous. So far, however, treatment studies based on the Canada-2003 or ICC-2011 case definitions are not available.

1  
2  
3  
4  
5  
6  
7  
8  
9  
10  
11  
12  
13  
14  
15  
16  
17  
18  
19  
20  
21  
22  
23  
24  
25  
26  
27  
28  
29  
30  
31  
32  
33  
34  
35  
36  
37  
38  
39  
40  
41  
42  
43  
44  
45  
46  
47  
48  
49  
50  
51  
52  
53  
54  
55  
56  
57  
58  
59  
60

Case definitions for *clinical practice* should be research based, validated and manageable to provide a tool which can relieve patient uncertainty, indicate the most appropriate treatment, and prevent adverse effects and waste of health care resources of unnecessary treatment and diagnostic procedures<sup>67</sup>. They should be founded on available knowledge regarding the mechanisms of the actual condition, validated through credible and transparent processes, and presented in a format which can be implemented in everyday practice. An argument for more inclusive case definitions for CFS/ME would be the issue of treatment, since existing evidence indicates that side effects of cognitive behavioural treatment or graded exercise therapy are negligible. For this context, the CDC-1994/Fukuda case definition appears suitable, with the NICE-2007 as a good candidate for validation studies.

### Implications for research and clinical practice

Based on our review, we argue that development of further case definitions of CFS/ME should be given low priority, as long as causal explanations for the disease are limited. It might still be useful to classify patients according to severity and symptom patterns, aiming to identify characteristics of patients that might predict differences in prognosis or expected effects of therapy.

It is likely that all CFS/ME case definitions capture conditions with different or multifactorial pathogenesis and varying prognosis. The futile dichotomy of “organic” versus “psychic” disorder should be abandoned. Most medical disorders have a complex etiology. Psychological treatments are often helpful also for clear-cut somatic disorders. Unfortunately patient groups and researchers with vested interests in the belief that ME is a distinct somatic disease, seem unwilling to leave the position that ME is an organic disease only. This position has damaged the research and practice for patients suffering of CFS/ME.

### Conclusions

1  
2  
3 Our review provided no evidence that any of the case definitions identify patients with  
4 specific or “organic only” disease etiology. Priority should be given to further  
5 development and testing of promising treatment options for patients with CFS/ME.  
6  
7 Classification of patients according to severity and symptom patterns, aiming to identify  
8 characteristics of patients that might predict differences in prognosis or expected effects  
9 of therapy, might be useful. Development of further case definitions of CFS/ME should  
10 be given low priority. Consistency in research can be achieved by application of  
11 diagnostic criteria which have been systematically evaluated and compared to other case  
12 definitions.  
13  
14  
15  
16  
17  
18  
19  
20  
21  
22  
23  
24  
25  
26  
27  
28  
29  
30  
31  
32  
33  
34  
35  
36  
37  
38  
39  
40  
41  
42  
43  
44  
45  
46  
47  
48  
49  
50  
51  
52  
53  
54  
55  
56  
57  
58  
59  
60

1  
2  
3  
4  
5  
6  
7  
8  
9  
10  
11  
12  
13  
14  
15  
16  
17  
18  
19  
20  
21  
22  
23  
24  
25  
26  
27  
28  
29  
30  
31  
32  
33  
34  
35  
36  
37  
38  
39  
40  
41  
42  
43  
44  
45  
46  
47  
48  
49  
50  
51  
52  
53  
54  
55  
56  
57  
58  
59  
60

**Funding:** This research received no specific grant from any funding agency in the public, commercial or not-for-profit sectors.

**Contributors:** KM had the original idea, and all five authors worked together to develop an appropriate theoretical framework and design. MSF developed the search, and all authors were involved in the selection process. LL and KGB extracted relevant data, KGB performed the statistical analysis, and all authors were involved in the data interpretation. KM wrote the manuscript draft and revised the draft based on input from the other authors. All authors revised it critically for content and approved the final version.

**Competing interests:** All authors have completed the ICMJE uniform disclosure form at [www.icmje.org/coi\\_disclosure.pdf](http://www.icmje.org/coi_disclosure.pdf) (available on request from the corresponding author) and declare that: (1) no support from any organisation for the submitted work; (2) no financial relationships with any organisations that might have an interest in the submitted work in the previous three years; (3) their spouses, partners, or children have no financial relationships that may be relevant to the submitted work; (4) no other non-financial interests that may be relevant to the submitted work.

**Ethical approval:** Not required.

**Data sharing statement:** All data are extracted from the cited primary studies.

## Reference List

- 1
- 2
- 3
- 4
- 5
- 6
- 7 (1) Afari N, Buchwald D. Chronic fatigue syndrome: a review. *Am J Psychiatry* 2003;160:221-236.
- 8
- 9 (2) Prins JB, van der Meer JW, Bleijenberg G. Chronic fatigue syndrome. *Lancet* 2006;367:346-355.
- 10
- 11 (3) White PD. What causes chronic fatigue syndrome? *BMJ* 2004;329:928-929.
- 12
- 13 (4) Komaroff AL, Geiger AM, Wormsely S. IgG subclass deficiencies in chronic fatigue syndrome.
- 14 *Lancet* 1988;1:1288-1289.
- 15
- 16 (5) Buchwald D, Wener MH, Pearlman T, et al. Markers of inflammation and immune activation in
- 17 chronic fatigue and chronic fatigue syndrome. *J Rheumatol* 1997;24:372-376.
- 18
- 19 (6) Lorusso L, Mikhaylova SV, Capelli E, et al. Immunological aspects of chronic fatigue syndrome.
- 20 *Autoimmun Rev* 2009;8:287-291.
- 21
- 22 (7) Wensaas KA, Langeland N, Hanevik K, et al. Irritable bowel syndrome and chronic fatigue 3
- 23 years after acute giardiasis: historic cohort study. *Gut* 2012;61:214-219.
- 24
- 25 (8) Komaroff AL. Chronic fatigue syndromes: relationship to chronic viral infections. *J Virol*
- 26 *Methods* 1988;21:3-10.
- 27
- 28 (9) Fluge O, Bruland O, Risa K, et al. Benefit from B-lymphocyte depletion using the anti-CD20
- 29 antibody rituximab in chronic fatigue syndrome. A double-blind and placebo-controlled study.
- 30 *PLoS One* 2011;6:e26358.
- 31
- 32 (10) Kerr JR, Petty R, Burke B, et al. Gene expression subtypes in patients with chronic fatigue
- 33 syndrome/myalgic encephalomyelitis. *J Infect Dis* 2008;197:1171-1184.
- 34
- 35 (11) Salit IE. Precipitating factors for the chronic fatigue syndrome. *J Psychiatr Res* 1997;31:59-65.
- 36
- 37 (12) Kato K, Sullivan PF, Evengard B, et al. Premorbid predictors of chronic fatigue. *Arch Gen*
- 38 *Psychiatry* 2006;63:1267-1272.
- 39
- 40 (13) Knoop H, Prins JB, Moss-Morris R, et al. The central role of cognitive processes in the
- 41 perpetuation of chronic fatigue syndrome. *J Psychosom Res* 2010;68:489-494.
- 42
- 43 (14) de Lange FP, Kalkman JS, Bleijenberg G, et al. Gray matter volume reduction in the chronic
- 44 fatigue syndrome. *Neuroimage* 2005;26:777-781.
- 45
- 46 (15) Okada T, Tanaka M, Kuratsune H, et al. Mechanisms underlying fatigue: a voxel-based
- 47 morphometric study of chronic fatigue syndrome. *BMC Neurol* 2004;4:14.
- 48
- 49 (16) Wyller VB, Godang K, Morkrid L, et al. Abnormal thermoregulatory responses in adolescents
- 50 with chronic fatigue syndrome: relation to clinical symptoms. *Pediatrics* 2007;120:e129-e137.
- 51
- 52
- 53
- 54
- 55
- 56
- 57
- 58
- 59
- 60

- 1  
2  
3  
4 (17) Wyller VB, Saul JP, Amlie JP, et al. Sympathetic predominance of cardiovascular regulation  
5 during mild orthostatic stress in adolescents with chronic fatigue. *Clin Physiol Funct Imaging*  
6 2007;27:231-238.
- 7  
8  
9 (18) Parker AJ, Wessely S, Cleare AJ. The neuroendocrinology of chronic fatigue syndrome and  
10 fibromyalgia. *Psychol Med* 2001;31:1331-1345.
- 11  
12 (19) Van HB, Van Den Eede F, Luyten P. Does hypothalamic-pituitary-adrenal axis hypofunction in  
13 chronic fatigue syndrome reflect a 'crash' in the stress system? *Med Hypotheses* 2009;72:701-  
14 705.
- 15  
16  
17 (20) Holmes GP, Kaplan JE, Gantz NM, et al. Chronic fatigue syndrome: a working case definition.  
18 *Ann Intern Med* 1988;108:387-389.
- 19  
20  
21 (21) Maes M, Twisk FNM, Johnson C. Myalgic encephalomyelitis (ME), chronic fatigue syndrome  
22 (CFS), and chronic fatigue (CF) are distinguished accurately: Results of supervised learning  
23 techniques applied on clinical and inflammatory data. *Psychiatry Res* 2012;200:754-760.
- 24  
25  
26 (22) Carruthers BM, Jain AK, De Meirleir KL, et al. Myalgic encephalomyelitis/chronic fatigue  
27 syndrome: clinical working case definition, diagnostic and treatment protocols. *J Chronic*  
28 *Fatigue Syndr* 2003;11:7-115.
- 29  
30  
31 (23) Carruthers BM, van de Sande MI, De Meirleir KL, et al. Myalgic encephalomyelitis:  
32 International Consensus Criteria. *J Intern Med* 2011;270:327-338.
- 33  
34  
35 (24) Johnston S, Brenu EW, Staines DR, et al. The adoption of chronic fatigue syndrome/myalgic  
36 encephalomyelitis case definitions to assess prevalence: a systematic review. *Ann Epidemiol*  
37 2013;23:371-376.
- 38  
39  
40 (25) Bossuyt PM, Reitsma JB, Bruns DE, et al. Towards complete and accurate reporting of studies  
41 of diagnostic accuracy: the STARD initiative. *BMJ* 2003;326:41-44.
- 42  
43  
44 (26) Reitsma JB, Rutjes AW, Khan KS, et al. A review of solutions for diagnostic accuracy studies  
45 with an imperfect or missing reference standard. *J Clin Epidemiol* 2009;62:797-806.
- 46  
47  
48 (27) Johnston S, Brenu EW, Staines D, et al. The prevalence of chronic fatigue syndrome/ myalgic  
49 encephalomyelitis: a meta-analysis. *Clin Epidemiol* 2013;5:105-110.
- 50  
51  
52 (28) Whiting P, Rutjes AW, Reitsma JB, et al. The development of QUADAS: a tool for the quality  
53 assessment of studies of diagnostic accuracy included in systematic reviews. *BMC Med Res*  
54 *Methodol* 2003;3:25.
- 55  
56  
57 (29) Hoy D, Brooks P, Woolf A, et al. Assessing risk of bias in prevalence studies: modification of an  
58 existing tool and evidence of interrater agreement. *J Clin Epidemiol* 2012;65:934-939.
- 59  
60

- 1  
2  
3  
4  
5  
6  
7  
8  
9  
10  
11  
12  
13  
14  
15  
16  
17  
18  
19  
20  
21  
22  
23  
24  
25  
26  
27  
28  
29  
30  
31  
32  
33  
34  
35  
36  
37  
38  
39  
40  
41  
42  
43  
44  
45  
46  
47  
48  
49  
50  
51  
52  
53  
54  
55  
56  
57  
58  
59  
60
- (30) Dillman DA, Eltinge JL, Groves RM, Little RJA. Survey nonresponse in design, data collection and analysis. In Groves RM, Kalton G, Rao JNK, Schwartz N, Skinner C, eds, Survey nonresponse. New York: John Wiley & Sons, Inc. 2002; 3-26.
- (31) R Core Team. R: A language and environment for statistical computing. Vienna, Austria: R Foundation for Statistical Computing. 2013. <http://www.R-project.org/> (accessed 29. August 2013).
- (32) Lumley T. rmeta: Meta-analysis. R package version 2.16. 2012. <http://CRAN.R-project.org/package=rmeta> (accessed 6. August 2013).
- (33) Jason LA, Brown A, Clyne E, et al. Contrasting case definitions for chronic fatigue syndrome, Myalgic Encephalomyelitis/chronic fatigue syndrome and myalgic encephalomyelitis. *Eval Health Prof* 2012;35:280-304.
- (34) Osoba T, Pheby D, Gray S, et al. The development of an epidemiological definition for myalgic encephalomyelitis/chronic fatigue syndrome. *J Chronic Fatigue Syndr* 2008;14:16-84.
- (35) Jones JF, Kohl KS, Ahmadipour N, et al. Fatigue: Case definition and guidelines for collection, analysis, and presentation of immunization safety data. *Vaccine* 2007;25: 5685-5696.
- (36) Reeves WC, Lloyd A, Vernon SD, et al. Identification of ambiguities in the 1994 chronic fatigue syndrome research case definition and recommendations for resolution. *BMC Health Serv Res* 2003;3:31-39.
- (37) Dowsett EG, Ramsay AM, McCartney RA, et al. Myalgic encephalomyelitis - A persistent enteroviral infection? *Postgrad Med J* 1990;66:1990-530.
- (38) Komaroff AL, Fagioli LR, Geiger AM, et al. An examination of the working case definition of chronic fatigue syndrome. *Am J Med* 1996;100:56-64.
- (39) Fukuda K, Straus SE, Hickie I, et al. The chronic fatigue syndrome: a comprehensive approach to its definition and study. International Chronic Fatigue Syndrome Study Group. *Ann Intern Med* 1994;121:953-959.
- (40) Sharpe MC, Archard LC, Banatvala JE, et al. A report--chronic fatigue syndrome: guidelines for research. *J Roy Soc Med* 1991;84:118-121.
- (41) Jason LA, Corradi K, Torres-Harding S. Toward an empirical case definition of CFS. *J Soc Serv Res* 2007;34:43-54.
- (42) Ramsey M.A. Myalgic encephalomyelitis and postviral fatigue states: The saga of royal free disease. 2nd ed. London, UK: Gower; 1988.



- 1  
2  
3  
4  
5  
6  
7  
8  
9  
10  
11  
12  
13  
14  
15  
16  
17  
18  
19  
20  
21  
22  
23  
24  
25  
26  
27  
28  
29  
30  
31  
32  
33  
34  
35  
36  
37  
38  
39  
40  
41  
42  
43  
44  
45  
46  
47  
48  
49  
50  
51  
52  
53  
54  
55  
56  
57  
58  
59  
60
- (43) Ho-Yen DO. Patient management of post-viral fatigue syndrome. *Br J Gen Pract* 1990;40:37-39.
- (44) Lloyd AR, Hickie I, Boughton CR, et al. Prevalence of chronic fatigue syndrome in an Australian population. *Med J Aust* 1990;153:522-528.
- (45) Hyde BM. The Nightingale Definition of Myalgic Encephalomyelitis (M.E.). 2007. Ottawa, Canada, The Nightingale Research Foundation.
- (46) National Collaborating Center for Primary Care. NICE clinical guideline 53. Chronic fatigue syndrome/myalgic encephalomyelitis (or encephalopathy): diagnosis and management of CFS/ME in adults and children. 2007. London, National Institute for Health and Clinical Excellence
- (47) Jason LA, Evans M, Porter N, et al. The development of a revised Canadian myalgic encephalomyelitis chronic fatigue syndrome case definition. *Am J Biochem Biotechnol* 2010;6:120-135.
- (48) Report from the National Task Force on chronic fatigue syndrome (CFS), post viral fatigue syndrome (PVFS), myalgic encephalomyelitis (ME). 1994. Bristol: Westcare, The National Task Force on Chronic Fatigue Syndrome.
- (49) Hartz AJ, Kuhn EM, Levine PH. Characteristics of fatigued persons associated with features of chronic fatigue syndrome. *J Chronic Fatigue Syndr* 1998;4:71-97.
- (50) Nacul LC, Lacerda EM, Pheby D, et al. Prevalence of myalgic encephalomyelitis/chronic fatigue syndrome (ME/CFS) in three regions of England: a repeated cross-sectional study in primary care. *BMC Med* 2011;9:91.
- (51) Pheby D, Lacerda E, Nacul L, et al. A Disease Register for ME/CFS: Report of a Pilot Study. *BMC Res Notes* 2011;4:139.
- (52) Jason LA, Torres-Harding SR, Jurgens A, et al. Comparing the Fukuda et al. criteria and the Canadian case definition for chronic fatigue syndrome. *J Chronic Fatigue Syndr* 2004;12:2004-2052.
- (53) Brown AA, Jason LA, Evans MA, et al. Contrasting case definitions: The ME International Consensus Criteria vs. the Fukuda et al. CFS criteria. *North American Journal of Psychology* 2013;15:103-120.
- (54) Wessely S, Chalder T, Hirsch S, et al. The prevalence and morbidity of chronic fatigue and chronic fatigue syndrome: a prospective primary care study. *Am J Public Health* 1997;87:1449-1455.



- 1  
2  
3  
4 (55) Lindal E, Stefansson JG, Bergmann S. The prevalence of chronic fatigue syndrome in Iceland - a  
5 national comparison by gender drawing on four different criteria. *Nord J Psychiatry*  
6 2002;56:273-277.  
7  
8  
9 (56) Bates DW, Schmitt W, Buchwald D, et al. Prevalence of fatigue and chronic fatigue syndrome  
10 in a primary care practice. *Arch Intern Med* 1993; 153:2759-2765.  
11  
12 (57) Kawakami N, Iwata N, Fujihara S, et al. Prevalence of chronic fatigue syndrome in a community  
13 population in Japan. *Tohoku J Exp Med* 1998;186:33-41.  
14  
15 (58) Lawrie SM, Pelosi AJ. Chronic fatigue syndrome in the community. Prevalence and  
16 associations. *Br J Psychiatry* 1995;166:793-797.  
17  
18 (59) Swanink CM, Vercoulen JH, Bleijenberg G, et al. Chronic fatigue syndrome: a clinical and  
19 laboratory study with a well matched control group. *J Intern Med* 1995;237:499-506.  
20  
21 (60) White PD, Goldsmith KA, Johnson AL, et al. Comparison of adaptive pacing therapy, cognitive  
22 behaviour therapy, graded exercise therapy, and specialist medical care for chronic fatigue  
23 syndrome (PACE): a randomised trial. *Lancet* 2011;377:823-836.  
24  
25 (61) Hamilton WT, Gallagher AM, Thomas JM, et al. The prognosis of different fatigue diagnostic  
26 labels: a longitudinal survey. *Fam Pract* 2005;22:383-388.  
27  
28 (62) Chalder T, Power MJ, Wessely S. Chronic fatigue in the community: 'a question of attribution'.  
29 *Psychol Med* 1996;26:791-800.  
30  
31 (63) Reeves WC, Wagner D, Nisenbaum R, et al. Chronic fatigue syndrome - A clinically empirical  
32 approach to its definition and study. *BMC Med* 2005;3:19.  
33  
34 (64) Reeves WC, Jones JF, Maloney E, et al. Prevalence of chronic fatigue syndrome in  
35 metropolitan, urban, and rural Georgia. *Popul Health Metr* 2007;5:5.  
36  
37 (65) Jason LA, Najar N, Porter N, et al. Evaluating the Centers for Disease Control's empirical  
38 chronic fatigue syndrome case definition. *J Disabil Policy Stud* 2009;20:93-100.  
39  
40 (66) Twisk FN, Maes M. A review on cognitive behavioral therapy (CBT) and graded exercise  
41 therapy (GET) in myalgic encephalomyelitis (ME) / chronic fatigue syndrome (CFS): CBT/GET is  
42 not only ineffective and not evidence-based, but also potentially harmful for many patients  
43 with ME/CFS. *Neuro Endocrinol Lett* 2009;30:284-299.  
44  
45 (67) Mearin F, Lacy BE. Diagnostic criteria in IBS: useful or not? *Neurogastroenterol Motil*  
46 2012;24:791-801.  
47  
48 (68) Pawlikowska T, Chalder T, Hirsch SR, et al. Population based study of fatigue and psychological  
49 distress. *BMJ* 1994;308:763-766.  
50  
51  
52  
53  
54  
55  
56  
57  
58  
59  
60

- 1  
2  
3  
4  
5  
6  
7  
8  
9  
10  
11  
12  
13  
14  
15  
16  
17  
18  
19  
20  
21  
22  
23  
24  
25  
26  
27  
28  
29  
30  
31  
32  
33  
34  
35  
36  
37  
38  
39  
40  
41  
42  
43  
44  
45  
46  
47  
48  
49  
50  
51  
52  
53  
54  
55  
56  
57  
58  
59  
60
- (69) Brimacombe M, Helmer D, Natelson BH. Clinical differences exist between patients fulfilling the 1988 and 1994 case definitions of chronic fatigue syndrome. *J Clin Psychol Med S* 2002;9:309-314.
- (70) Jason LA, Torres-Harding SR, Taylor RR, et al. A comparison of the 1988 and 1994 diagnostic criteria for chronic fatigue syndrome. *J Clin Psychol Med S* 2001;8:337-343.
- (71) Jason LA, Skendrovic B, Furst J, et al. Data mining: comparing the empiric CFS to the Canadian ME/CFS case definition. *J Clin Psychol* 2012;68:41-49.
- (72) Jason LA, Helgerson J, Torres-Harding SR, et al. Variability in diagnostic criteria for chronic fatigue syndrome may result in substantial differences in patterns of symptoms and disability. *Eval Health Prof* 2003;26:3-22.
- (73) Wearden AJ, Dowrick C, Chew-Graham C, et al. Nurse led, home based self help treatment for patients in primary care with chronic fatigue syndrome: randomised controlled trial. *BMJ* 2010;340:c1777.
- (74) Stubhaug B, Lie SA, Ursin H, et al. Cognitive-behavioural therapy v. mirtazapine for chronic fatigue and neurasthenia: randomised placebo-controlled trial. *Br J Psychiatry* 2008;192:217-223.
- (75) Bazelmans E, Vercoulen JHMM, Swanink CMA, et al. Chronic Fatigue Syndrome and Primary Fibromyalgia Syndrome as recognized by GPs. *Fam Pract* 1999;16:602-604.
- (76) Buchwald D, Umali P, Umali J, et al. Chronic fatigue and the chronic fatigue syndrome: Prevalence in a Pacific northwest health care system. *Ann Intern Med* 1995;123:15-88.
- (77) Gunn WJ, Connell DB, Randall B. Epidemiology of chronic fatigue syndrome: the Centers for Disease Control Study. *Ciba Found Symp* 1993;173:83-93.
- (78) Price RK, North CS, Wessely S, et al. Estimating the prevalence of chronic fatigue syndrome and associated symptoms in the community. *Public Health Rep* 1992;107:514-522.
- (79) Versluis RG, de Waal MW, Opmeer C, et al. Prevalence of chronic fatigue syndrome in 4 family practices in Leiden. *Ned Tijdschr Geneesk* 1997;141:1523-1526.
- (80) Bierl C, Nisenbaum R, Hoaglin DC, et al. Regional distribution of fatiguing illnesses in the United States: a pilot study. *Popul Health Metr* 2004;2:1.
- (81) Cho HJ, Menezes PR, Hotopf M, et al. Comparative epidemiology of chronic fatigue syndrome in Brazilian and British primary care: Prevalence and recognition. *Br J Psychiatry* 2009;194:117-122.

- 1  
2  
3 (82) Evengård B, Jacks A, Pedersen NL, et al. The epidemiology of chronic fatigue in the Swedish  
4 Twin Registry. *Psychol Med* 2005;35:1317-1326.  
5  
6  
7 (83) Hamaguchi M, Kawahito Y, Takeda N, et al. Characteristics of chronic fatigue syndrome in a  
8 Japanese community population : chronic fatigue syndrome in Japan. *Clin Rheumatol*  
9 2011;30:895-906.  
10  
11 (84) Jason LA, Richman JA, Rademaker AW, et al. A community-based study of chronic fatigue  
12 syndrome. *Arch Intern Med* 1999;159:2129-2137.  
13  
14 (85) Kim CH, Shin HC, Won CW. Prevalence of chronic fatigue and chronic fatigue syndrome in  
15 Korea: community-based primary care study. *J Korean Med Sci* 2005;20:529-534.  
16  
17 (86) Njoku MG, Jason LA, Torres-Harding SR. The prevalence of chronic fatigue syndrome in  
18 Nigeria. *J Health Psychol* 2007;12:461-474.  
19  
20 (87) Reyes M, Nisenbaum R, Hoaglin DC, et al. Prevalence and incidence of chronic fatigue  
21 syndrome in Wichita, Kansas. *Arch Intern Med* 2003;163:1530-1536.  
22  
23 (88) Steele L, Dobbins JG, Fukuda K, et al. The epidemiology of chronic fatigue in San Francisco. *Am*  
24 *J Med* 1998;105:83S-90S.  
25  
26 (89) van't Leven M, Zielhuis GA, van der Meer JW, et al. Fatigue and chronic fatigue syndrome-like  
27 complaints in the general population. *Eur J Public Health* 2010;20:251-257.  
28  
29 (90) Vincent A, Brimmer DJ, Whipple MO, et al. Prevalence, incidence, and classification of chronic  
30 fatigue syndrome in Olmsted County, Minnesota, as estimated using the Rochester  
31 epidemiology project. *Mayo Clin Proc* 2012;87:1145-1152.  
32  
33 (91) Yiu YM, Qiu MY. A preliminary epidemiological study and discussion on traditional Chinese  
34 medicine pathogenesis of chronic fatigue syndrome in Hong Kong. *Zhong Xi Yi Jie He Xue*  
35 *Bao/Journal of Chinese Integrative Medicine* 2005;3:359-362.  
36  
37 (92) Ho-Yen DO, McNamara I. General practitioners' experience of the chronic fatigue syndrome.  
38 *Br J Gen Pract* 1991;41:324-326.  
39  
40  
41  
42  
43  
44  
45  
46  
47  
48  
49  
50  
51  
52  
53  
54  
55  
56  
57  
58  
59  
60

**Table 1**  
**Case definitions for CFS/ME**

| <b>CASE DEFINITIONS</b><br>(chronologically)                | <b>Developed from other<br/>criteria or definitions?</b> | <b>INSTITUTION AND COUNTRY OF FIRST AUTHOR</b>                    | <b>CITATIONS<sup>A</sup></b><br>ISI/Google Scholar |
|-------------------------------------------------------------|----------------------------------------------------------|-------------------------------------------------------------------|----------------------------------------------------|
| CDC-1988/Holmes <sup>20</sup>                               |                                                          | Centers for Disease Control, Atlanta, USA                         | 1106/1542                                          |
| Myalgic encephalomyelitis 1988/Ramsey <sup>42</sup>         |                                                          | Royal Free Hospital, London, UK                                   | 6/51                                               |
| London-1990/Dowsett <sup>37</sup>                           |                                                          | Royal Free Hospital, London, UK                                   | 55/88                                              |
| Australian-1990 <sup>44</sup>                               |                                                          | The Prince Henry Hospital, Little Bay, Australia                  | 230/343                                            |
| Post-viral fatigue syndrome-1990 <sup>43</sup>              |                                                          | Raigmore Hospital, Inverness, UK                                  | 14/28                                              |
| Oxford-1991 <sup>40</sup>                                   |                                                          | University of Oxford, Oxford, UK                                  | 476/667                                            |
| London ME-1994/National Task Force Guidelines <sup>48</sup> |                                                          | National Task Force, Bristol, UK                                  | no records                                         |
| CDC-1994/Fukuda <sup>39</sup>                               | CDC-1988                                                 | Centers for Disease Control, Atlanta, USA                         | 1860/3006                                          |
| Working Case Definition-1996 <sup>38</sup>                  | CDC-1988                                                 | Brigham and Women's Hospital Massachusetts, USA                   | 78/138                                             |
| Chronic Fatigue Syndrome-1998 <sup>49</sup>                 | CDC-1994                                                 | Medical College of Wisconsin, USA                                 | 8/23                                               |
| Canadian-2003 <sup>22</sup>                                 |                                                          | Royal College of Physicians and Surgeons of Canada, Canada        | 69/233                                             |
| Empirical CDC-2005/Reeves <sup>63</sup>                     | CDC-1994                                                 | Centers for Disease Control and Prevention, Atlanta, USA          | 73/154                                             |
| Empirical-2007 <sup>41</sup>                                |                                                          | DePaul University, Chicago, USA                                   | 5/14                                               |
| Brighton Collaboration-2007 <sup>35</sup>                   |                                                          | Centers for Disease Control and Prevention, Atlanta, USA          | 1/5                                                |
| NICE-2007 Guidelines <sup>46</sup>                          |                                                          | National Institute for Health and Clinical Excellence, London, UK | no records/23 <sup>B</sup>                         |
| The Nightingale Definition of ME/Hyde-2007 <sup>45</sup>    |                                                          | The Nightingale Research Foundation, Canada                       | no records/5                                       |
| Epidemiological CFS/ME Definition-2008 <sup>34</sup>        |                                                          | Southampton, Hampshire, UK                                        | 2/4                                                |
| Revised Canadian-2010 <sup>47</sup>                         | CDC-1994, Empirical CDC-2005, Canadian-2003              | DePaul University, Illinois, USA                                  | 8/18                                               |
| ICC-2011 <sup>23</sup>                                      | Canadian-2003                                            | Independent, Canada                                               | 4/16                                               |
| ME-2011 <sup>33</sup>                                       | Dowsett, Ramsey, Hyde                                    | DePaul University, Illinois, USA                                  | 1/1                                                |

<sup>A</sup>Searched 23. May 2012 <sup>B</sup> Summary of the NICE Guidelines in: *Diagnosis and management of chronic fatigue syndrome or myalgic encephalomyelitis (or encephalopathy): summary of NICE guidance BMJ 2007; 335:446*

1  
2  
3  
4  
5  
6  
7  
8  
9  
10  
11  
12  
13  
14  
15  
16  
17  
18  
19  
20  
21  
22  
23  
24  
25  
26  
27  
28  
29  
30  
31  
32  
33  
34  
35  
36  
37  
38  
39  
40  
41  
42  
43  
44  
45  
46  
47  
48  
49

**Table 2**

**Studies presenting prevalence estimates\* by independent application of several case definitions on the same population (Model A)**

| <b>First author, year, country</b>    | <b>Data collection</b>                                                                                                                                                                                                                                                 | <b>Prevalence (95 % CI)</b>                                                                                 |
|---------------------------------------|------------------------------------------------------------------------------------------------------------------------------------------------------------------------------------------------------------------------------------------------------------------------|-------------------------------------------------------------------------------------------------------------|
| Nacul <sup>50</sup><br>2011, UK       | 609 possible cases electronically identified in databases of 29 GP practices. 70 excluded after clinical revision (explained fatigue), 135 refusals and 126 non-cases.                                                                                                 | ECD: 0.03 % (0.02-0.04)<br>Canada: 0.10 % (0.09-0.12)<br>Fukuda: 0.19 % (0.17-0.21)                         |
| Bates <sup>56</sup><br>1993, US       | 995 consecutive GP visitors invited - 94 % screened by a questionnaire to detect major fatigue. Selected patients further evaluated by questionnaires, physical examinations and interviews.                                                                           | Holmes: 0.3 % (0.1-0.9)<br>Oxford: 0.4 % (0.1 -1.1)<br>Australia: 1.1 % (0.5-2.0)                           |
| Kawakami <sup>57</sup><br>1998, Japan | All adults (n=508) in Town A, Kofu-city, were invited to participate in this structured psychiatric diagnostic interview survey. 137 (27%) completed the study                                                                                                         | Holmes: 0.0 % (0.0-2.7)<br>Fukuda: 1.5 % (0.2-5.2)<br>Oxford: 1.5 % (0.2-5.2)                               |
| Lindal <sup>55</sup><br>2002, Iceland | Survey sent to 4000 randomly selected adult participants – 63% responded. Questionnaire included questions on all items in the four case definitions. Diagnosis were set electronically based on received responses. No medical tests or examinations were undertaken. | Holmes 0.0 % (0.0-1.5)<br>Fukuda: 2.1 % (1.6-2.8)<br>Oxford: 3.7 % (3.2-4.6)<br>Australia: 7.6 % (6.6-8.7)  |
| Wessely <sup>54;68</sup><br>1997, UK  | 2363 patients followed in a cohort study – 84% completed. Fatigued participant subjected to detailed questionnaires, interviews, and laboratory testing. Separate estimates reported for inclusion/exclusion of psychiatric co-morbidity.                              | Holmes: 1.2 % (0.5-1.8)<br>Australia: 1.4 % (0.8-2.0)<br>Oxford: 2.2 % (1.4-3.0)<br>Fukuda: 2.6 % (1.7-3.4) |

\*Prevalence estimates were calculated with the number of responders in the denominator. The choice of denominator may have large implications with regard to the subsequent prevalence estimate, particularly in studies with low response rate. Hence, depending on the actual response rate, estimates presented for each study may be biased.

Table 3

**Conformity of prevalence estimates in studies where patients diagnosed with CFS/ME with one set of diagnostic criteria are diagnosed sequentially with other case definitions (Model B)**

| Study Recruitment                                                                 | Case definitions                                   | Conformity <sup>#</sup> (95% CI)                                                          | Symptom and burden profile                                                                                                                                                                                                                       |
|-----------------------------------------------------------------------------------|----------------------------------------------------|-------------------------------------------------------------------------------------------|--------------------------------------------------------------------------------------------------------------------------------------------------------------------------------------------------------------------------------------------------|
| <b>Brimacombe</b> <sup>69</sup> , US<br>Fukuda-positive from register             | Fukuda* (n=200)<br>Holmes (n=171)                  | 1<br>0.85 (0.80-0.90)                                                                     | [F+/H-] patients do not endorse infectious-type symptoms as often or to the same degree of severity as [F+/H+] patients                                                                                                                          |
| <b>Jason</b> <sup>70</sup> , US<br>Fukuda-positive from register                  | Fukuda* (n=32)<br>Holmes (n=14)                    | 1<br>0.44 (0.26-0.62)                                                                     | [F+/H+] patients with more symptoms and functional impairment than [F+/H-]. No difference in psychological co-morbidity                                                                                                                          |
| <b>Jason</b> <sup>52</sup> , US<br>Fukuda-positive from register                  | Fukuda* (n=32)<br>Canada (n=23) <sup>§</sup>       | 1<br>0.63 (0.44-0.79)                                                                     | C+ patients have less psychiatric co-morbidity, more physical function impairment, are more fatigued with more neurological symptoms than [F+/C-] patients                                                                                       |
| <b>Jason</b> <sup>33</sup> , US<br>Fukuda-positive recruited from many sources    | Fukuda* (n=113)<br>Canada (n=57)<br>ME-2011 (n=27) | 1<br>0.50 (0.41-0.60)<br>0.24 (0.16-0.33)                                                 | [F+/C+] patients had more functional impairments, and physical, mental, and cognitive problems than [F+/C-] patients. [F+/ME+] patients had more functional impairments, and more severe physical and cognitive symptoms than [F+/ME-] patients. |
| <b>Fluge</b> <sup>9</sup> , Norway<br>Fukuda-positive patients recruited to trial | Fukuda* (n=30)<br>Canada (n=28)                    | 1<br>0.93 (0.78-0.99)                                                                     | Not reported                                                                                                                                                                                                                                     |
| <b>Jason</b> <sup>71</sup> , US<br>Register                                       | Fukuda* (n=24)<br>Reeves empirical<br>Canada       | Of 24 F+ and 84 F- patients empirical criteria and Canada identified 79 and 87% correctly | Canada-2003 case definition appear to select more cardinal and central features of the illness than Empirical CDC-2005/Reeves case definition                                                                                                    |
| <b>Jason</b> <sup>65</sup> , US<br>Register                                       | Fukuda* (n=27)<br>Reeves emp. (n=41) <sup>§§</sup> | 1<br>1.00 (0.87-1.00)                                                                     | Empirical CDC-2005/Reeves case definition led to mis-classification of major depressive disorder as CFS                                                                                                                                          |

29

|    |                                             |                               |                  |                                                                                                                                                                                         |
|----|---------------------------------------------|-------------------------------|------------------|-----------------------------------------------------------------------------------------------------------------------------------------------------------------------------------------|
| 5  | <b>Brown</b> <sup>53</sup> , US             | Fukuda* (n=113)               | 1                | ICC+ patients with more functional impairments and physical, mental and cognitive problems than [F+/ICC-] patients. The ICC+ patients also had greater rates of psychiatric comorbidity |
| 6  | Fukuda-positive recruited from many sources | ICC (n=39)                    | 0.35 (0.26-0.44) |                                                                                                                                                                                         |
| 9  | <b>Jason</b> <sup>72</sup> , US             | Fukuda* (n=32)                | 1                | D+ patients appear to be more symptomatic than [F+/D-] patients, especially in the neurological and neuropsychiatric areas.                                                             |
| 10 | Fukuda-positive from register               | Dowsett (n=17) <sup>§§§</sup> | 0.44 (0.26-0.62) |                                                                                                                                                                                         |
| 12 | <b>White</b> <sup>60</sup> , UK             | Oxford* (n=641)               | 1                | Effect of CBT and GET similar regardless of diagnostic group affiliation                                                                                                                |
| 13 | Oxford-positive patients recruited to trial | Fukuda (n=427)                | 0.67 (0.63-0.70) |                                                                                                                                                                                         |
| 14 |                                             | London ME (n=329)             | 0.51 (0.47-0.55) |                                                                                                                                                                                         |
| 15 | <b>Wearden</b> <sup>73</sup> , UK           | Oxford* (n=296)               | 1                | Not reported                                                                                                                                                                            |
| 16 | Oxford-positive patients recruited to trial | London ME (n=92)              | 0.31 (0.26-0.37) |                                                                                                                                                                                         |
| 18 | <b>Stubhaug</b> <sup>74</sup> , Norway      | Neurasthenia* (n=72)          | 1                | Not reported                                                                                                                                                                            |
| 19 | Neurasthenia-positive                       | Oxford (n=65)                 | 0.90 (0.81-0.96) |                                                                                                                                                                                         |
| 20 | patients recruited to trial                 | Fukuda (n=29)                 | 0.40 (0.29-0.53) |                                                                                                                                                                                         |

#The proportion of cases relative to the evaluation standard; \*Evaluation standard;

§ 3/23 participants testing positive according to Canada were negative according to Fukuda

§§ 14/37 depressed patients tested positive according to Reeves and negative on Fukuda

§§§ 3/17 participants testing positive according to Dowsett were negative according to Fukuda



**Table 4****Studies presenting prevalence estimates for CFS/ME from several case definitions applied on different populations (Model C)**

| First author, year<br>COUNTRY                     | CASE<br>DEFINITION                   | RECRUITMENT STRATEGY                                                                             |
|---------------------------------------------------|--------------------------------------|--------------------------------------------------------------------------------------------------|
| Bazelmans 1999 <sup>75</sup><br>The Netherlands   | As recognized by<br>GP               | Questionnaire to all GPs,<br>Prevalence estimated to 0.11 %                                      |
| Lloyd 1990 <sup>44</sup><br>Australia             | Australian                           | Recruited through GP's covering 76206 patients                                                   |
| Buchwald 1995 <sup>76</sup><br>US                 | CDC-1988/<br>Holmes                  | Postal survey to 4000 randomly selected participants                                             |
| Gunn 1993 <sup>77</sup><br>US                     | CDC-1988/<br>Holmes                  | Recruited by contact with primary health care providers;<br>prevalence in the range 0.002-0.007% |
| Price 1992 <sup>78</sup><br>USA                   | CDC-1988/<br>Holmes                  | Interview survey with 13538 participants                                                         |
| Versluis 1997 <sup>79</sup><br>The Netherlands    | CDC-1988/<br>Holmes                  | 23000 patients in GP database                                                                    |
| Bierl 2004 <sup>80</sup><br>US                    | CDC-1994/<br>Fukuda                  | Random digit-dialing survey with 7317 respondent                                                 |
| Cho 2009 <sup>81</sup><br>UK                      | CDC-1994/<br>Fukuda                  | 2530 consecutive GP visitors                                                                     |
| Cho 2009 <sup>81</sup><br>Brazil                  | CDC-1994/<br>Fukuda                  | 3921 consecutive GP visitors                                                                     |
| Evengård 2005 <sup>82</sup><br>Sweden             | CDC-1994/<br>Fukuda                  | Phone survey of 41499 participants in a twin register                                            |
| Hamaguchi 2011 <sup>83</sup><br>Japan             | CDC-1994/<br>Fukuda                  | 3000 random participants in a health check program                                               |
| Jason 1999 <sup>84</sup><br>US                    | CDC-1994/<br>Fukuda                  | Phone survey with 18675 respondents                                                              |
| Kim 2005 <sup>85</sup><br>South Korea             | CDC-1994/<br>Fukuda                  | 1962 consecutive GP visitors                                                                     |
| Njoku 2007 <sup>86</sup><br>Nigeria               | CDC-1994/<br>Fukuda                  | Interview survey with 1500 participants                                                          |
| Reeves 2007 <sup>64</sup><br>US                   | CDC-1994/<br>empirical               | Phone survey with 10837 responding households                                                    |
| Reyes 2003 <sup>87</sup><br>US                    | CDC-1994/<br>Fukuda                  | Phone survey with 33997 responding households                                                    |
| Steele 1998 <sup>88</sup><br>US                   | CDC-1994/<br>Fukuda                  | Phone survey with 8004 responding households                                                     |
| van't Leven 2009 <sup>89</sup><br>The Netherlands | CDC-1994/<br>Fukuda                  | Postal survey to 22500 randomly selected participants                                            |
| Vincent 2012 <sup>90</sup><br>US                  | CDC-1994/<br>Fukuda                  | Retrospective medical record review in Olmsted County;<br>183841 residents                       |
| Yiu 2005 <sup>91</sup><br>China                   | CDC-1994/<br>Fukuda                  | Unknown                                                                                          |
| Lawrie 1995 <sup>58</sup><br>UK                   | Oxford                               | Postal survey to 1039 randomly selected participants                                             |
| Ho-Yen 1991 <sup>92</sup><br>UK                   | Post viral<br>exhaustion<br>syndrome | Postal survey to 195 GPs; prevalence 0.13 % (0.12-0.15)                                          |



1  
2  
3  
4  
5  
6  
7  
8  
9  
10  
11  
12  
13  
14  
15  
16  
17  
18  
19  
20  
21  
22  
23  
24  
25  
26  
27  
28  
29  
30  
31  
32  
33  
34  
35  
36  
37  
38  
39  
40  
41  
42  
43  
44  
45  
46  
47  
48  
49  
50  
51  
52  
53  
54  
55  
56  
57  
58  
59  
60

For peer review only

1  
2  
3  
4  
5  
6 **Case definitions for Chronic Fatigue Syndrome/Myalgic Encephalomyelitis**  
7 **(CFS/ME) - A systematic review**  
8  
9

10  
11 Kjetil Gundro Brurberg PhD <sup>1</sup>, Marita Sporstøl Fønhus PhD <sup>1</sup>, Lillebeth Larun PT PhD <sup>1</sup>,  
12 Signe Flottorp MD PhD <sup>1,2</sup>, Kirsti Malterud MD PhD <sup>3,4,5</sup>  
13  
14  
15

16  
17  
18 <sup>1</sup> Norwegian Knowledge Centre for the Health Services, NO-0130 Oslo, Norway  
19

20  
21 <sup>2</sup> Institute of Health and Society, University of Oslo, NO-0318 Oslo, Norway  
22

23 <sup>3</sup> Department of Global Public Health and Primary Care, University of Bergen, NO-5020  
24 Bergen, Norway  
25

26  
27 <sup>4</sup> Research Unit for General Practice, Uni Health, Uni Research, NO-5008 Bergen,  
28 Norway  
29

30  
31 <sup>5</sup> Research Unit for General Practice in Copenhagen, DK-1014 Copenhagen K, Denmark  
32  
33  
34  
35

36 **Correspondence to:** KG Brurberg [kgb@kunnskapsenteret.no](mailto:kgb@kunnskapsenteret.no)  
37  
38  
39

40 **Word count:** ~~4010~~4083 (excluding title page, abstract, references, boxes, tables and figures)  
41  
42

43 **Numbers of tables and numbers of figures:** 4 tables and 5 figures  
44

45 **Keywords:** ~~Fatigue~~Chronic fatigue syndrome, diagnosis, criteria, case definition  
46  
47  
48  
49  
50  
51  
52  
53  
54  
55  
56  
57  
58  
59  
60

## **Abstract**

**Objective:** To identify case definitions for Chronic Fatigue Syndrome/Myalgic Encephalomyelitis (CFS/ME), and explore how the validity of case definitions can be evaluated in the absence of a reference standard.

**Design:** Systematic review.

**Setting:** International.

**Participants:** A literature search, updated as of November 2013, led to identification of 20 case definitions and inclusion of 38 validation studies.

**Primary and secondary outcome measure:** Validation studies were assessed for risk of bias and categorised according to three validation models: A) independent application of several case definitions on the same population, B) sequential application of different case definitions on patients diagnosed with CFS/ME with one set of diagnostic criteria, or C) comparison of prevalence estimates from different case definitions applied on different populations.

**Results:** A total of 38 studies contributed data of sufficient quality and consistency for evaluation of validity, with CDC-1994/Fukuda as the most frequently applied case definition. No study rigorously assessed reproducibility or feasibility of case definitions. Validation studies were small with methodological weaknesses and inconsistent results. No empirical data indicated that any case definition specifically identified patients with a neuroimmunological condition.

**Conclusions:** Classification of patients according to severity and symptom patterns, aiming to predict prognosis or effectiveness of therapy, seems useful. Development of further case definitions of CFS/ME should be given low priority. Consistency in research can be achieved by applying diagnostic criteria that have been subjected to systematic evaluation.

**Abstract**

**Objective** To identify case definitions for Chronic Fatigue Syndrome/Myalgic Encephalomyelitis (CFS/ME), and explore how one can evaluate the validity of case definitions in the absence of a reference standard.

**Design** Systematic review.

**Data sources and eligibility criteria** The Cochrane Library, Ovid AMED, Ovid MEDLINE In-Process & Other Non-Indexed Citations, Ovid MEDLINE, Ovid EMBASE, CINAHL, Ovid PsycINFO, PEDRO databases, and reference lists were searched for studies presenting or validating case definitions for CFS/ME for adult populations November 2013.

**Review methods** We searched for relevant case definitions and validation studies. Potential validation studies were assessed for risk of bias and categorised according to three validation models: independent application of several case definitions on the same population, sequential application of different sets of diagnostic criteria, or comparison of prevalence estimates from different case definitions applied on different populations.

**Results** We identified 20 case definitions. A total of 38 studies contributed data of sufficient quality and consistency for evaluation of validity, with CDC 1994/Fukuda as the most frequently applied case definition. No study rigorously assessed reproducibility or feasibility of case definitions. Validation studies were small with methodological weaknesses and inconsistent results. No empirical data indicated that any case definition specifically identified patients with a neuroimmunological condition.

**Conclusions** Classification of patients according to severity and symptom patterns, aiming to predict prognosis or effectiveness of therapy, seems useful. Development of further case definitions of CFS/ME should be given low priority. One can achieve consistency in research by applying diagnostic criteria that have been subjected to systematic evaluation.

## Article summary

### Article focus

- Several case definitions for ~~CFS/ME~~Chronic Fatigue Syndrome/Myalgic Encephalomyelitis (CFS/ME) exist, but there is no general agreement on a reference standard for diagnosis.
- This study aims to identify and ~~describe differences between~~compare case definitions for ~~Chronic Fatigue Syndrome/Myalgic Encephalitis (CFS/ME)~~.
- ~~Second, we~~We also explore how accuracy and validity of the case definitions can be evaluated in the absence of a reference standard.

### Key messages

- None of the included studies rigorously assessed the reproducibility or feasibility of existing case definitions.
- Only one included study reported data in a way that ~~facilitates robust and direct comparisons of~~made it possible to compare different case definitions rigorously and directly.
- We found no empirical evidence supporting the hypothesis that some case definitions more specifically identify patients with a neuroimmunological condition.

### Strengths and limitations of this study

- The main strength of our study is the systematic methods used to identify and appraise articles presenting and evaluating case definitions of CFS/ME.
- We ~~have~~ used systematic and transparent approaches to extract data, categorise the studies according to pre-specified models, and to analyse and compare the data.
- The included validation studies showed considerable methodological weaknesses and inconsistent results, and it is therefore difficult to draw firm conclusions.

## Introduction

Chronic fatigue syndrome (CFS) is a serious disorder characterised by persistent post-exertional fatigue and substantial symptoms related to cognitive, immune and autonomous dysfunction<sup>1,2</sup>. Disease mechanisms are complex<sup>3</sup>, with no single causal factor identified. Yet there are indications that infections<sup>4-8</sup> and ~~autoimmune~~immunologic dysfunction<sup>9</sup> contribute to development and maintenance of symptoms, probably interacting with genetic<sup>10</sup> ~~and~~<sup>10</sup> ~~and~~ psychosocial<sup>11-13</sup> factors.

Studies have identified pathological patterns and structures of the central nervous system<sup>14,15</sup>, dysregulation of body temperature and blood pressure<sup>16,17</sup>, and dysfunctional stress hormonal systems<sup>18,19</sup> in CFS patients compared to normal controls. None of these appears sufficiently consistent to constitute a diagnostic test, and case definitions (diagnostic criteria) are therefore used to define the CFS diagnosis. When case definitions are developed, the context of application must be considered, since different properties are needed for case definition intended for research purposes compared to case definitions used to diagnose individual patients. It is also necessary to consider whether a broad (i.e. sensitive criteria ensuring that we do not miss relevant cases) or narrow (i.e. specific criteria ensuring that all positive cases are definite) approach is most appropriate.

Holmes et al<sup>20</sup> coined the term “Chronic Fatigue Syndrome” in 1988, as an alternative to “The chronic Epstein-Barr virus syndrome”. ~~Case definitions (diagnostic criteria) are used in research and clinical practice to define the CFS diagnosis. Since the first~~ Since this case definition - the CDC-1988/Holmes Criteria - was presented in 1988<sup>20</sup>, numerous revisions have been developed, aiming for distinctive and reliable identification of individuals who represent a homogenous and consistent phenotype of the hypothesized disease entity, consistent with pathophysiological and psychosocial findings.

~~Holmes et al<sup>20</sup> coined the term “Chronic Fatigue Syndrome” in 1988, as an alternative to “The chronic Epstein-Barr virus syndrome”.~~ Today the term “Myalgic Encephalomyelitis” (ME) is commonly used to conceptualize a specific neuroimmunological condition, assumed to be more severe and less psychologically attributed than CFS<sup>21</sup>. In 2003, Carruthers et al presented the Canadian-2003 Criteria<sup>22</sup> for diagnosis of Myalgic Encephalomyelitis/Chronic Fatigue Syndrome<sup>21,22</sup>. A revised

1  
2  
3  
4  
5  
6  
7  
8  
9  
10  
11  
12  
13  
14  
15  
16  
17  
18  
19  
20  
21  
22  
23  
24  
25  
26  
27  
28  
29  
30  
31  
32  
33  
34  
35  
36  
37  
38  
39  
40  
41  
42  
43  
44  
45  
46  
47  
48  
49  
50  
51  
52  
53  
54  
55  
56  
57  
58  
59  
60

version was presented as International Consensus Criteria (the ICC--2011 Criteria) for Myalgic Encephalomyelitis<sup>22,23</sup>, claiming to be a selective case definition for identification of patients with neuroimmune exhaustion with a pathologically low threshold of fatigability and symptom flare after exertion. The assertion that CFS and ME are different clinical entities is disputed. Below, we will pragmatically apply the term CFS/ME.

Johnston et al conducted a systematic review of the adoption of CFS/ME case definitions to assess prevalence and identified eight different case definitions<sup>23,24</sup>. There is no general agreement on a reference standard for diagnosis, and no diagnostic test is available. ~~No studies exist where diagnostic accuracy is assessed by comparing case definitions with a reference standard in consecutive patients suspected of having CFS/ME~~<sup>24</sup>. Bossuyt et al. include case definitions in their understanding of the term “test”, emphasizing that diagnostic tests are highly dynamic and need rigorous evaluation before they are introduced into clinical ~~practice~~<sup>25</sup>:practice<sup>25;26</sup>.

The objectives of our study were to explore strategies for evaluation of accuracy and concept validity of different case definitions for CFS/ME in the absence of a reference standard. First, we wanted to conduct a systematic review to identify and describe different case definitions (sets of diagnostic criteria) for CFS/ME. Second, we wanted to explore differences between various case definitions by identifying and reviewing validation studies.

## Method and material

### *Protocol and registration*

We developed a protocol for our study, ~~but~~. ~~However~~, we did not publish or register it.

### *Eligibility criteria*

We included studies presenting or validating case definitions for CFS/ME for adult populations (>18 years). No language restrictions were employed.

### *Information sources and search*

We searched ~~The Cochrane Library~~, Ovid ~~AMED, MEDLINE and~~ Ovid MEDLINE In-Process & Other Non-Indexed Citations, ~~from 1946~~, Ovid EMBASE, ~~CINAHL from 1980~~, Ovid PsycINFO ~~from 1806~~, Ovid AMED ~~from 1985~~, ~~The Cochrane Library from 1898~~, CINAHL ~~from 1981~~, and PEDRO ~~databases January 2012, with an updated search in November 2013 from 1929~~ using subject headings and text words (Appendix 1). All searches were up to date as of 25. November 2013. We checked the reference lists of all included articles and searched for unpublished and on-going studies by correspondence with authors and field experts.

### *Study selection*

To select publications eligible for this review, two authors independently read all titles and abstracts in the records retrieved by the searches. We obtained publications in full text if the abstract was deemed eligible by at least one review author. At least two authors independently read the full text papers and selected studies according to the inclusion criteria. Any disagreement between review authors was resolved by discussion between the two review authors or, if necessary, by involving all authors.

### *Data collection process*

First, we listed all the identified *case definitions for CFS/ME*. ~~We~~ One author gathered information about citation from ISI and Google Scholar to indicate the impact or widespread of use, but we made no attempt to assess or rank the quality of the case definitions at this stage.

~~Then we organized and reviewed those of the identified studies which held a potential to compare and evaluate different case definitions—the validation studies. We developed three different models in which the validation studies could be categorised for comparison and evaluation:~~



To facilitate the validity assessment, we developed a framework consisting of three different models:

Model A includes studies with *independent application of different case definitions on the same population* (Figure 1). This model presents the interrelationship between subpopulations identified by the different case definitions.

<Insert Figure 1 about here>

Model B includes studies where patients diagnosed with CFS/ME with *one set of diagnostic criteria are diagnosed sequentially with other case definitions* assumed to have increasing specificity (Figure 2).

<Insert Figure 2 about here>

Model C includes surveys or cross-sectional studies ~~aimed at~~ estimating the *prevalence* of CFS/ME ~~obtained~~ by applying different case definitions on different populations (Figure 3). These studies do not directly compare different case definitions, but may be used for proxy evaluation, similar to the strategy applied by Johnston et al <sup>23;2624;27</sup>.

<Insert figure 3 about here>

Two authors reviewed all potentially relevant *validation studies*, and categorised them according to Model A, B or C. Any disagreement between review authors at this stage was resolved by reaching consensus in the author group.

### *Risk of bias in individual studies*

To differentiate between studies with higher and lower risk of bias, we critically appraised all included validation studies according to check lists: Studies comparing two or more case definitions directly (i.e. Model A or B) were appraised according to the QUADAS-criteria <sup>2728</sup> (patient selection, index test, reference standard, flow, and timing). For evaluation of prevalence studies (i.e. Model C) we used an outline for assessment of external and internal validity (11 items) of prevalence studies <sup>2829</sup>.

### *Analysis*

1  
2  
3  
4  
5  
6  
7  
8  
9  
10  
11  
12  
13  
14  
15  
16  
17  
18  
19  
20  
21  
22  
23  
24  
25  
26  
27  
28  
29  
30  
31  
32  
33  
34  
35  
36  
37  
38  
39  
40  
41  
42  
43  
44  
45  
46  
47  
48  
49  
50  
51  
52  
53  
54  
55  
56  
57  
58  
59  
60

Participation in prevalence studies, surveys, and questionnaires vary across the included studies. Non-response is known to introduce bias, and methods to adjust for low response rates are available <sup>29,30</sup>. In studies affected by non-response, we have reported adjusted estimates whenever applicable. If adjusted estimates were unavailable, we have defined the proportion as the number of cases divided by the number of responders. We estimated 95-% confidence intervals for all proportions by using the Clopper-Pearson exact binomial method. We used R software version 3.0.0 and the rmeta package for statistical computations and plotting <sup>30,31,32</sup>.

## Results

### *Study selection*

Our systematic literature search identified ~~10361660~~ unique references, of which 56 articles fulfilled our inclusion criteria (Figure 4). ~~Among these, 20~~ Twenty articles present different *case definitions* of CFS/ME for research or clinical practice <sup>20,22,32-48,23,33-49</sup> (Table 1). ~~The remaining 36~~ Furthermore, 38 studies were classified as *validation studies*, contributing data of ~~suffieientquality~~ sufficient quality and consistency for evaluation of different case definitions according to our inclusion criteria.

< Insert Table 1 and Figure 4 about here >

The degree to which the different case definitions had been applied in research and clinical guidelines varied widely, with CDC-1994/Fukuda <sup>39</sup> as the most frequently cited case definition of CFS/ME.

~~12~~ Thirteen of the 20 identified case definitions had been assessed in one or more validation study <sup>20,21,32,22,23,33,35,34,36,38-40,42,37,39-41,43,46,44,47</sup>. For ~~eight~~ seven case definitions, no foundation for validation could be identified. We did not identify any study which rigorously assessed the reproducibility or feasibility of the different case definitions.

*Independent application of several case definitions on the same population (Model A)*

Five studies (Table 2) applied several case definitions on the same population, but only one of these reported data in a way that ~~facilitated sufficiently robust comparisons of~~ made it possible to compare the case definitions <sup>49;50;51</sup>. Nacul et al <sup>49</sup> al <sup>50</sup> used GP databases and questionnaires and identified 278 patients with unexplained chronic fatigue conforming to one or more of the case definition applied, i.e. CDC-1994/Fukuda <sup>38;39</sup>, Canadian-2003 <sup>21;22</sup> or ECD-~~2008~~ <sup>33</sup> 2008 <sup>34</sup>. Most of the patients who were positive according to the Canada-criteria [C+] were also positive using the Fukuda criteria [F+]. 47-% of the Fukuda positive patients were also positive according to the Canada criteria. Patients who were positive to both the Canada and Fukuda [C+/-F+] reported a higher level of symptoms than those who were [F+/-C-]. The authors did not identify differences in the distribution of triggering factors <sup>49;50</sup>.

< Insert Table 2 about here >

None of the other four studies in this group reported data on the correlation between case definitions, patient profile, and symptom burden. Application of CDC-1988/Holmes case definition was consistently associated with lower prevalence estimates than CDC-1994/Fukuda, Oxford-1991, and Australian-1990 criteria across these four studies. There was no consistent trend for the other case definitions, but the studies were heterogeneous regarding the application of ~~the~~ different case definitions and data collection (Table 2). This observation suggests that prevalence numbers obtained by different case definitions should be controlled according to diagnostic procedure, cut-off points and reasons for exclusions before concluding upon differences.

*Different case definitions with assumed increasing specificity applied sequentially on the same population (Model B)*

~~Eleven~~ Twelve studies (Table 3) ~~had~~ sequentially applied different case definitions on the same population. In these studies, patients were screened by the use of an evaluation standard. Subsequently, test-positive individuals were screened with one or more comparators. ~~Eight~~ Nine of the ~~eleven~~ twelve studies applied CDC-1994/Fukuda as the evaluation standard, and then tested Fukuda-positive patients with CDC-1988/Holmes,

1  
2  
3 Canadian-2003, [ICC- 2011](#), ME-2011, Empirical-2006/Reeves, London-1990/Dowsett, or  
4 Neurasthenia case definitions.  
5

6  
7 < Insert Table 3 about here >  
8

9  
10 We have taken the actual evaluation standard as a point of departure, and calculated the  
11 proportion of these patients still positive when applying other case definitions. Since  
12 there are no test negatives for the case definition used as point of departure, true  
13 sensitivities or specificities cannot be calculated. Results from two of the studies by Jason  
14 et al. <sup>32;54</sup> [33;52](#) suggest that 40-70% of the Fukuda positive patients are also Canada  
15 positives [F+/C+]. One study <sup>51;52</sup> concluded that there was less psychiatric co-morbidity  
16 and more physical functional impairment in the sub-sample which was positive on both  
17 case definitions [F+/C+] than those who were negative according to the Canada criteria  
18 [F+/C-]. However, the other study <sup>33</sup> suggested a higher incidence of mental and  
19 cognitive problems among Fukuda positive patients who were also Canada positive  
20 [F+/C+] as compared to the remaining Fukuda positive but Canada negative patients  
21 [F+/C-]. In a separate publication <sup>53</sup>, the same Fukuda positive patients as referred in  
22 Jason 2012 <sup>33</sup> were used to contrast ICC-2011. About 34% (95% CI 26%-44%) of the  
23 Fukuda positive patients were also ICC positives [F+/ICC+]. Similar to the [F+/C+]  
24 subset, it was found that [F+/ICC+] patients experienced more functional impairments as  
25 well as more mental and cognitive problems and higher psychiatric comorbidity than  
26 [F+/ICC-] patient.  
27  
28

29  
30 The comparisons presented in table 3 are associated with high risk of bias as well as  
31 random errors, and the results should be interpreted with great caution. For example, two  
32 of the included studies reported similar point prevalence according to CDC-1994/Fukuda  
33 (2.1% and 2.6%) but reported very different estimates using the Australian-1990 criteria  
34 (7.6% and 1.4%) <sup>52;53</sup> [54;55](#). Sometimes diagnoses were based on questionnaire responses  
35 only, sometimes following detailed clinical interviews and laboratory testing. There  
36 ~~are~~ were also differences in the way similar case definitions ~~had been~~ were practiced in the  
37 various studies, e.g. some studies applied a low threshold for exclusion of cases with  
38 psychiatric ~~co-morbidity~~ comorbidity, while others did not.  
39  
40  
41  
42  
43  
44  
45  
46  
47  
48  
49  
50  
51  
52  
53  
54  
55  
56  
57  
58  
59  
60

*Indirect comparisons of prevalence estimates from several case definitions applied on different populations (Model C)*

We identified ~~1721~~ studies (Table 4) presenting prevalence estimates for CFS/ME (Figure 3), in addition to the five studies presenting prevalence estimates following the application of multiple case definitions (Table 2). Based on these studies, we extracted ~~1317~~ independent estimates of the prevalence following application of the CDC-1994/Fukuda criteria (Figure 5).

< Insert Table 4 about here >

Our analysis suggests that the population prevalence of CFS/ME according to the CDC-1994/Fukuda case definition probably is less than 1% (range 0.~~21~~ to 6.4%; median 1.~~20~~%), with higher prevalence among consecutive GP-attendants than from population studies. Prevalence estimates seemed higher when patients were diagnosed without a preceding medical examination. Prevalence estimates of CFS/ME according to CDC-1988/Holmes case definition seemed lower, with all the studies reporting prevalence estimates ranging from 0.0 to 0.3% (median 0.05%).

Five studies<sup>54-58</sup> reported CFS/ME prevalence estimates according to the Oxford-1991 case definition. These estimates ranged from 0.4% - 3.7% (median 1.5%). Four studies<sup>44;54-56</sup> reported prevalence estimates according to the Australian-1990 case definition ranging from 0.04% - 7.6% (median 1.2%).

## Discussion

We identified 20 studies presenting different CFS/ME case definitions, and ~~36~~studies<sup>38</sup> studies with data providing access to comparison and evaluation of some of these. Only a minority of existing case definitions had been submitted to comparative evaluations. The validation studies were methodologically weak and heterogeneous, making it ~~difficult~~questionable to compare the case definitions. The most cited case definition (CDC-1994/Fukuda<sup>39</sup>) is also the most extensively validated one, whereas validation studies are few (Canadian-2003<sup>22</sup>, ICC-2011<sup>23</sup>) or missing (NICE-2007<sup>46</sup>) for more recently presented and debated case definitions. We found no empirical evidence

1  
2  
3 supporting the hypothesis that some case definitions more specifically identify patients  
4 with a neuroimmunological condition, ~~excluding patients with psychiatric co-morbidity.~~  
5  
6  
7  
8  
9

### 10 11 *Strengths and weaknesses of our study*

12  
13  
14 The main strength of our study is the systematic methods used to identify and appraise  
15 articles presenting case definitions of CFS/ME and studies potentially useful to evaluate  
16 the case definitions. Furthermore, we have used systematic and transparent approaches to  
17 extract data from the validation studies, categorise the studies according to three different  
18 models, and to analyse and compare the data.  
19  
20  
21

22  
23 The STARD initiative aims to improve the reporting on studies of diagnostic accuracy,  
24 considering any method for obtaining additional information on a patient's health status  
25 as a test<sup>25</sup>. Due to the lack of a reference standard, we found this guideline less suitable  
26 for review of articles evaluating case definitions for CFS/ME. Still, issues such as study  
27 populations, test methods and rationale, technical specifications for application of the test,  
28 statistical methods for comparing measures of accuracy and uncertainty, estimates of  
29 diagnostic accuracy, variability, and clinical applicability<sup>25</sup> are relevant also for our  
30 analysis.  
31  
32  
33

34  
35 The validation studies we identified were small with considerable methodological  
36 weaknesses and inconsistent results. Only one study held a level of rigor where  
37 independent application of several case definitions was conducted on the same population  
38 (Model A)<sup>4950</sup>. Such a study should ideally be based on a population sample rather than a  
39 GP practice database, and should compare a selection of currently applied and debated  
40 case definitions, such as CDC-1994/Fukuda, Oxford-1991, Canadian-2003 and NICE-  
41 2007.  
42  
43  
44  
45  
46  
47  
48  
49

50  
51 The QUADAS-criteria<sup>28</sup> demonstrate that Model B is an evaluation strategy prone to  
52 several sources of bias. First, the spectrum of patients subjected to the comparator is  
53 selected and not representative of the population receiving the test if it is used alone.  
54  
55  
56  
57  
58  
59  
60

1  
2  
3  
4  
5  
6  
7  
8  
9  
10  
11  
12  
13  
14  
15  
16  
17  
18  
19  
20  
21  
22  
23  
24  
25  
26  
27  
28  
29  
30  
31  
32  
33  
34  
35  
36  
37  
38  
39  
40  
41  
42  
43  
44  
45  
46  
47  
48  
49  
50  
51  
52  
53  
54  
55  
56  
57  
58  
59  
60

clinical evaluations were not independent. The estimates from two of the Jason studies [32;5433:52](#) suggest a comparable correspondence (40-70% of the F+ are also C+) with the results presented by Nacul and co-workers <sup>50</sup>. Yet, Model B gives no or limited information regarding those who screened negative in the first place. We do not know if some of those might have had a positive diagnosis if screened with one of the other case definitions.

~~Compared to Model B, we~~ We are even more prone to bias when exploring the consistency of different case definitions through indirect comparisons of prevalence estimates obtained from different populations (Model C), and great caution is needed when such indirect proxy comparisons are undertaken. For example, two of the included studies reported similar point prevalence according to CDC-1994/Fukuda (2.1% and 2.6%), but reported very different estimates following the application of the Australian-1990 criteria (7.6% and 1.4%) [52;53 54;55](#). This inconsistency ~~is likely to can~~ be explained by ~~the~~ major methodological differences seen across the included studies: Our sample includes studies in which a diagnosis of CFS/ME is made on the basis on either questionnaire responses or clinical interview. Previous studies suggest that patients who receive a standardised questionnaire report considerable more symptoms than when asked to report their symptoms spontaneously <sup>59</sup>. There are several other sources to this between study heterogeneity of study power and quality (such as recruitment strategy, response rate and strategies for non-response adjustment) and heterogeneity of how. We were not able to identify the diagnostic process was implemented. Some authors made diagnoses based on questionnaire responses, other conducted clinical interviews and laboratory testing. In most important one. However, Johnston et al performed interesting subgroup analysis in their meta-analysis of 14 studies applying the CDC-1994/Fukuda case definition, ~~Johnston et al and~~ found that the pooled prevalence for self-reporting assessment was 3.28% (95% CI: 2.24–4.33) ~~and compared to~~ 0.76% (95% CI: 0.23–1.29) for clinical assessment <sup>27</sup>. Prevalence was lower in community samples (0.87%; 0.32–1.42) than in primary care samples (1.72%; 1.40–2.04). The prevalence estimates based on self-reports showed high variability, while clinically assessed estimates were more consistent, especially in the community samples.



### *The utility of case definitions and diagnoses*

The utility of a diagnosis is linked to the potential effects of being diagnosed (e.g. benefits and harms of the patient role, access to treatment and insurance). More ~~importantly~~important, a diagnosis is useful if it is linked to valid information regarding prognosis or outcomes of therapy ~~or prognosis~~. Reitsma et al suggest clinical test validation as an alternative paradigm for evaluation of a diagnostic test when an acceptable reference standard is missing <sup>2426</sup>. Hence, primary studies and systematic reviews on prognosis and therapy are alternative sources to evaluate the usefulness of different case definitions of CFS/ME. We have identified only one such publication, the PACE trial <sup>5760</sup>. Here, participants were diagnosed according to the Oxford-1991 criteria, Empirical criteria-2007/-Reeves and London ME-1994/-National Task Force criteria, and then randomised to either standard medical treatment, graded exercise therapy, cognitive behaviour therapy or pacing. The results showed that the effectiveness of the treatments was similar across groups, irrespective of ~~which~~the case definition ~~that was~~which had been used. Fluge et al applied the CDC-1994/Fukuda and retrospectively added the Canada criteria in their study on the effects of rituximab in CFS <sup>9</sup> ~~with comparable results with comparable results~~ <sup>9</sup>. In a recent publication, Maes et al measured symptom severity, selected biomarkers and post-exertional malaise in 144 patients with chronic fatigue (CF), of whom 107 fulfilled the CDC-1994/Fukuda criteria of CFS/ME <sup>21</sup>. They claimed that CF, CFS and ME are distinct categories, although stating that patients group together in one continuum with no clear boundaries between them <sup>21</sup>. Such studies would be even more useful if outcomes of specific treatment modes had also been tested.

A study comparing the prognosis of different diagnostic labels of fatigue found that patients with ME had the worst prognosis; while patients with post-viral fatigue syndrome had the best <sup>5861</sup>. This could mean that the patients destined to the worst prognosis were labelled with the ME diagnosis, or it might be explained as an adverse effect of being labelled with ME. The authors found no significant difference in recorded fatigue before the diagnosis of CFS and ME, and the data in this retrospective study supported the hypothesis of the labeling effect. Another study found that ~~the prognosis of~~ patients who attributed their fatigue to ME ~~was worse than of~~were more fatigued and



1  
2  
3  
4 | more handicapped in relation to home, work, social and private leisure activities than  
5 patients who attributed their fatigue to psychological or social factors <sup>62</sup>.  
6  
7  
8

9  
10 *Broad or narrow case definitions?*

11  
12 Ideally, correspondence validity between test and target should be 100% for *sensitivity*  
13 (the capacity to identify patients in the target group) and *specificity* (the capacity to rule  
14 out patients that do not belong to the target group). More often, there is a trade-off  
15 between these measures, depending on the purpose of diagnosis. Emphasizing sensitivity  
16 implies a risk of over-diagnosis, which dilutes the actual diagnostic concept, while  
17 emphasizing specificity implies a risk of under-diagnosis, dismissing patients who might  
18 benefit from treatment. Development of more exclusive case definitions for CFS/ME  
19 have been proposed, claiming that existing case definitions do not select homogenous  
20 sets of patients <sup>23</sup>. More specifically, Oxford-1991, Fukuda-1994 and NICE-2007 have  
21 been criticised, especially by patient organizations, for undue overlap with  
22 psychopathology. Proponents of recent case definitions such as Canada-2003 and ICC-  
23 2011 aim for, claim to achieve a narrow selection of patients with myalgic  
24 encephalomyelitis ME conforming to a hypothesized specific pathophysiology. Our  
25 review demonstrates, however, that these case definitions do not necessarily exclude  
26 patients with psychopathology.  
27  
28  
29  
30  
31  
32  
33  
34  
35  
36  
37  
38

39  
40 A lesson could be learnt from Reeves, who tried to elaborate the CDC1994/Fukuda  
41 definition and bring methodological rigor into the diagnostic criteria by scores from  
42 standardized and validated instruments <sup>63</sup>. The Empirical-2006/Reeves case definition led  
43 to a tenfold prevalence estimate as compared with the CDC1994/Fukuda definition <sup>64</sup>,  
44 probably due to misclassification and inclusion of patients with major depressive disorder  
45 <sup>65</sup>. The purpose of rigor had not been achieved, and the Empirical-2006/Reeves case  
46 definition was never broadly implemented. According to our review, it is uncertain  
47 whether a more homogenous subset of patients can be achieved with the Canada-2003  
48 and ICC-2011 case definitions. The authors of the latter paper write: “Collectively,  
49 members have approximately 400 years of both clinical and teaching experience,  
50 authored hundreds of peer-reviewed publications, diagnosed or treated approximately  
51  
52  
53  
54  
55  
56  
57  
58  
59  
60

1  
2  
3 50 000 patients with ME, and several members co-authored previous criteria.”<sup>2223</sup>. This  
4 declaration is no validity criterion and provides no guarantee that the case definition  
5 works according to the intentions.  
6  
7  
8  
9

### 10 11 *Case definitions for research or clinical practice?*

12  
13 *Research* requires uniform and reproducible criteria, suitable for unambiguous definitions  
14 of the target population. Another concern is to compare studies across time and nations.  
15 These are arguments for an inclusive case definition, preferably one which has been in  
16 use for a while, and for which validation studies are available. In CFS/ME research, the  
17 Oxford-1991 and CDC-1994/Fukuda are the most frequently used case definitions. Our  
18 review indicates that the former might be more inclusive, with lower specificity than the  
19 latter, although the impact of this is unclear. Proponents for more restrictive case  
20 definitions dismiss findings from treatment studies documenting effects of cognitive  
21 behavioural treatment or graded exercise therapy for patients diagnosed with the Oxford-  
22 1991 or CDC-1994/Fukuda case definitions<sup>6366</sup>. Their claim is that for a more exclusive  
23 selection of patients with ME, defined according to specific hypothesized  
24 pathophysiology, the side effects of these treatment modalities are hazardous. So far,  
25 however, treatment studies ~~of side-effects~~ based on the Canada-2003 or ICC-2011 case  
26 definitions are not available.  
27  
28  
29  
30  
31  
32  
33  
34  
35  
36  
37

38  
39 Case definitions for *clinical practice* should be research based, validated and manageable  
40 to provide a tool which can relieve patient uncertainty, indicate the most appropriate  
41 treatment, and prevent adverse effects and waste of health care resources of unnecessary  
42 treatment and diagnostic ~~procedures, conserve limited healthcare resources and initiate~~  
43 ~~the most appropriate treatment~~<sup>64</sup> procedures<sup>67</sup>. They should be founded on available  
44 knowledge regarding the mechanisms of the actual condition, validated through credible  
45 and transparent processes, and presented in a format which can be implemented in  
46 everyday practice. An argument for more inclusive case definitions for CFS/ME would  
47 be the issue of treatment, since ~~based on~~ existing evidence indicates that side effects of  
48 cognitive behavioural treatment or graded exercise therapy are negligible. For this  
49  
50  
51  
52  
53  
54  
55  
56  
57  
58  
59  
60

1  
2  
3 context, the CDC-1994/Fukuda case definition appears suitable, with the NICE-2007 as a  
4 good candidate for validation studies.  
5  
6  
7  
8

### 9 10 **Implications for research and clinical practice**

11 Based on our review, we argue that development of further case definitions of CFS/ME  
12 should be given low priority, as long as causal explanations for the disease are limited. It  
13 might still be useful to classify patients according to severity and symptom patterns,  
14 aiming to identify characteristics of patients that might predict differences in prognosis or  
15 expected effects of therapy.  
16  
17  
18  
19

20 It is likely that all CFS/ME case definitions capture conditions with different or  
21 multifactorial pathogenesis and varying prognosis. The futile dichotomy of “organic”  
22 versus “psychic” disorder should be abandoned. Most medical disorders have a complex  
23 etiology. Psychological treatments are often helpful also for clear-cut somatic disorders.  
24 Unfortunately patient groups and researchers with vested interests in the belief that ME is  
25 a distinct somatic disease, seem unwilling to leave the position that ME is an organic  
26 disease only. This position has damaged the research and practice for patients suffering of  
27 CFS/ME.  
28  
29  
30  
31  
32  
33  
34  
35  
36  
37  
38

### 39 **Conclusions**

40 Our review provided no evidence that any of the case definitions identify patients with  
41 specific or “organic only” disease etiology. Priority should be given to further  
42 development and testing of promising treatment options for patients with CFS/ME.  
43 Classification of patients according to severity and symptom patterns, aiming to identify  
44 characteristics of patients that might predict differences in prognosis or expected effects  
45 of therapy, might be useful. Development of further case definitions of CFS/ME should  
46 ~~on the other hand~~ be given low priority. Consistency in research can be achieved by  
47 application of diagnostic criteria which have been systematically evaluated and compared  
48 to other case definitions.  
49  
50  
51  
52  
53  
54  
55  
56  
57  
58  
59  
60

1  
2  
3  
4  
5  
6  
7  
8  
9  
10  
11  
12  
13  
14  
15  
16  
17  
18  
19  
20  
21  
22  
23  
24  
25  
26  
27  
28  
29  
30  
31  
32  
33  
34  
35  
36  
37  
38  
39  
40  
41  
42  
43  
44  
45  
46  
47  
48  
49  
50  
51  
52  
53  
54  
55  
56  
57  
58  
59  
60

**Funding:** This research received no specific grant from any funding agency in the public, commercial or not-for-profit sectors.

**Competing interests:** All authors have completed the ICMJE uniform disclosure form at [www.icmje.org/coi\\_disclosure.pdf](http://www.icmje.org/coi_disclosure.pdf) (available on request from the corresponding author) and declare that: (1) no support from any organisation for the submitted work; (2) no financial relationships with any organisations that might have an interest in the submitted work in the previous three years; (3) their spouses, partners, or children have no financial relationships that may be relevant to the submitted work; (4) no other non-financial interests that may be relevant to the submitted work.

**Contributors:** KM had the original idea, and all five authors worked together to develop an appropriate theoretical framework and design. MSF developed the search, and all authors were involved in the selection process. LL and KGB extracted relevant data, KGB performed the statistical analysis, and all authors were involved in the data interpretation. KM wrote the manuscript draft and revised the draft based on input from the other authors. All authors revised it critically for content and approved the final version.

**Ethical approval:** Not required.

## Reference List

- (1) Afari N, Buchwald D. Chronic fatigue syndrome: a review. *Am J Psychiatry* 2003;160:221-236.
- (2) Prins JB, van der Meer JW, Bleijenberg G. Chronic fatigue syndrome. *Lancet* 2006;367:346-355.
- (3) White PD. What causes chronic fatigue syndrome? *BMJ* 2004;329:928-929.
- (4) Komaroff AL, Geiger AM, Wormsely S. IgG subclass deficiencies in chronic fatigue syndrome. *Lancet* 1988;1:1288-1289.
- (5) Buchwald D, Wener MH, Pearlman T, et al. Markers of inflammation and immune activation in chronic fatigue and chronic fatigue syndrome. *J Rheumatol* 1997;24:372-376.
- (6) Lorusso L, Mikhaylova SV, Capelli E, et al. Immunological aspects of chronic fatigue syndrome. *Autoimmun Rev* 2009;8:287-291.
- (7) Wensaas KA, Langeland N, Hanevik K, et al. Irritable bowel syndrome and chronic fatigue 3 years after acute giardiasis: historic cohort study. *Gut* 2012;61:214-219.
- (8) Komaroff AL. Chronic fatigue syndromes: relationship to chronic viral infections. *J Virol Methods* 1988;21:3-10.
- (9) Fluge O, Bruland O, Risa K, et al. Benefit from B-lymphocyte depletion using the anti-CD20 antibody rituximab in chronic fatigue syndrome. A double-blind and placebo-controlled study. *PLoS One* 2011;6(10):e26358.
- (10) Kerr JR, Petty R, Burke B, et al. Gene expression subtypes in patients with chronic fatigue syndrome/myalgic encephalomyelitis. *J Infect Dis* 2008;197:1171-1184.
- (11) Salit IE. Precipitating factors for the chronic fatigue syndrome. *J Psychiatr Res* 1997;31:59-65.
- (12) Kato K, Sullivan PF, Evengard B, et al. Premorbid predictors of chronic fatigue. *Arch Gen Psychiatry* 2006;63:1267-1272.
- (13) Knoop H, Prins JB, Moss-Morris R, et al. The central role of cognitive processes in the perpetuation of chronic fatigue syndrome. *J Psychosom Res* 2010;68:489-494.
- (14) ~~Tirelli U, Chierichetti F, Tavio M, de Lange FP, Kalkman JS, Bleijenberg G, et al. Brain positron emission tomography (PET) Gray matter volume reduction in the chronic fatigue syndrome: preliminary data. *Am J Med* 1998;105(3A):54S-58S. *Neuroimage* 2005;26:777-781.~~
- (15) ~~Duffy FH, McAnulty GB, McCreary M, Okada T, Tanaka M, Kuratsune H, et al. EEG spectral coherence data distinguish Mechanisms underlying fatigue: a voxel-based morphometric study~~

~~of chronic fatigue syndrome—patients from healthy controls and depressed patients—a case control study.~~ *BMC Neurol* 2011;11:822004;4:14.

- (16) Wyller VB, Godang K, Morkrid L, et al. Abnormal thermoregulatory responses in adolescents with chronic fatigue syndrome: relation to clinical symptoms. *Pediatrics* 2007;120(4):e129-e137.
- (17) Wyller VB, Saul JP, Amlie JP, et al. Sympathetic predominance of cardiovascular regulation during mild orthostatic stress in adolescents with chronic fatigue. *Clin Physiol Funct Imaging* 2007;27:231-238.
- (18) Parker AJ, Wessely S, Cleare AJ. The neuroendocrinology of chronic fatigue syndrome and fibromyalgia. *Psychol Med* 2001;31:1331-1345.
- (19) Van HB, Van Den Eede F, Luyten P. Does hypothalamic-pituitary-adrenal axis hypofunction in chronic fatigue syndrome reflect a 'crash' in the stress system? *Med Hypotheses* 2009;72:701-705.
- (20) Holmes GP, Kaplan JE, Gantz NM, et al. Chronic fatigue syndrome: a working case definition. *Ann Intern Med* 1988;108:387-389.

~~(21)~~ (21) Maes M, Twisk FNM, Johnson C. Myalgic encephalomyelitis (ME), chronic fatigue syndrome (CFS), and chronic fatigue (CF) are distinguished accurately: Results of supervised learning techniques applied on clinical and inflammatory data. *Psychiatry Res* 2012;200:754-760.

~~(22)~~ Carruthers BM, Jain AK, De Meirleir KL, et al. Myalgic encephalomyelitis/chronic fatigue syndrome: clinical working case definition, diagnostic and treatment protocols. *J Chronic Fatigue Syndr* 2003;11:7-115.

~~(223)~~ Carruthers BM, van de Sande MI, De Meirleir KL, et al. Myalgic encephalomyelitis: International Consensus Criteria. *J Intern Med* 2011;270:327-338.

~~(2324)~~ Johnston S, Brenu EW, Staines DR, et al. The adoption of chronic fatigue syndrome/myalgic encephalomyelitis case definitions to assess prevalence: a systematic review. *Ann Epidemiol* 2013;23:371-376.

~~(24)~~ (25) Bossuyt PM, Reitsma JB, Bruns DE, et al. Towards complete and accurate reporting of studies of diagnostic accuracy: the STARD initiative. *BMJ* 2003;326:41-44.

~~(26)~~ Reitsma JB, Rutjes AW, Khan KS, et al. A review of solutions for diagnostic accuracy studies with an imperfect or missing reference standard. *J Clin Epidemiol* 2009;62:797-806.

- ~~(25) Bessuyt PM, Reitsma JB, Bruns DE, et al. Towards complete and accurate reporting of studies of diagnostic accuracy: the STARD initiative. *BMJ* 2003;326:41-44.~~
- (2627) Johnston S, Brenu EW, Staines D, et al. The prevalence of chronic fatigue syndrome/ myalgic encephalomyelitis: a meta-analysis. *Clin Epidemiol* 2013;5:105-110.
- (2728) Whiting P, Rutjes AW, Reitsma JB, et al. The development of QUADAS: a tool for the quality assessment of studies of diagnostic accuracy included in systematic reviews. *BMC Med Res Methodol* 2003;3:25.
- (2829) Hoy D, Brooks P, Woolf A, et al. Assessing risk of bias in prevalence studies: modification of an existing tool and evidence of interrater agreement. *J Clin Epidemiol* 2012;65:934-939.
- (2930) Dillman DA, Eltinge JL, Groves RM, Little RJA. Survey nonresponse in design, data collection and analysis. In Groves RM, Kalton G, Rao JNK, Schwartz N, Skinner C, eds, Survey nonresponse. New York: John Wiley & Sons, Inc. 2002; 3-26.
- (3031) R Core Team. R: A language and environment for statistical computing. Vienna, Austria: R Foundation for Statistical Computing. 2013. <http://www.R-project.org/> (accessed 29. August 2013).
- (3132) Lumley T. rmeta: Meta-analysis. R package version 2.16. 2012. <http://CRAN.R-project.org/package=rmeta> (accessed 6. August 2013).
- (3233) Jason LA, Brown A, Clyne E, et al. Contrasting case definitions for chronic fatigue syndrome, Myalgic Encephalomyelitis/chronic fatigue syndrome and myalgic encephalomyelitis. *Eval Health Prof* 2012;35:280-304.
- (3334) Osoba T, Pheby D, Gray S, et al. The development of an epidemiological definition for myalgic encephalomyelitis/chronic fatigue syndrome. *J Chronic Fatigue Syndr* 2008;14:16-84.
- (3435) Jones JF, Kohl KS, Ahmadipour N, et al. Fatigue: Case definition and guidelines for collection, analysis, and presentation of immunization safety data. *Vaccine* 2007;25:5685-5696.
- (3536) Reeves WC, Lloyd A, Vernon SD, et al. Identification of ambiguities in the 1994 chronic fatigue syndrome research case definition and recommendations for resolution. *BMC Health Serv Res* 2003;3:2531-39.
- (3637) Dowsett EG, Ramsay AM, McCartney RA, et al. Myalgic encephalomyelitis - A persistent enteroviral infection? *Postgrad Med J* 1990;66:5261990-530.
- (3738) Komaroff AL, Fagioli LR, Geiger AM, et al. An examination of the working case definition of chronic fatigue syndrome. *Am J Med* 1996;100:56-64.



- 1  
2  
3  
4  
5  
6  
7  
8  
9  
10  
11  
12  
13  
14  
15  
16  
17  
18  
19  
20  
21  
22  
23  
24  
25  
26  
27  
28  
29  
30  
31  
32  
33  
34  
35  
36  
37  
38  
39  
40  
41  
42  
43  
44  
45  
46  
47  
48  
49  
50  
51  
52  
53  
54  
55  
56  
57  
58  
59  
60
- (3839) Fukuda K, Straus SE, Hickie I, et al. The chronic fatigue syndrome: a comprehensive approach to its definition and study. International Chronic Fatigue Syndrome Study Group. *Ann Intern Med* 1994;121:953-959.
- (3940) Sharpe MC, Archard LC, Banatvala JE, et al. A report--chronic fatigue syndrome: guidelines for research. *J Roy Soc Med* 1991;84:118-121.
- (4041) Jason LA, Corradi K, Torres-Harding S. Toward an empirical case definition of CFS. *J Soc Serv Res* 2007;34:43-54.
- (4142) Ramsey M.A. Myalgic encephalomyelitis and postviral fatigue states: The saga of royal free disease. 2nd ed. London, UK: Gower; 1988.
- (4243) Ho-Yen DO. Patient management of post-viral fatigue syndrome. *Br J Gen Pract* 1990;40:37-39.
- (4344) Lloyd AR, Hickie I, Boughton CR, et al. Prevalence of chronic fatigue syndrome in an Australian population. *Med J Aust* 1990;153:522-528.
- (4445) Hyde B-MBM. The Nightingale Definition of Myalgic Encephalomyelitis (M.E.). -2007. Ottawa, Canada, The Nightingale Research Foundation.
- (4546) National Collaborating Center for Primary Care. NICE clinical guideline 53. Chronic fatigue syndrome/myalgic encephalomyelitis (or encephalopathy): diagnosis and management of CFS/ME in adults and children. 2007. London, National Institute for Health and Clinical Excellence-
- (4647) Jason LA, Evans M, Porter N, et al. The development of a revised Canadian myalgic encephalomyelitis chronic fatigue syndrome case definition. *Am J Biochem Biotechnol* 2010;6:120-135.
- (4748) Report from the National Task Force on chronic fatigue syndrome (CFS), post viral fatigue syndrome (PVFS), myalgic encephalomyelitis (ME). -1994. Bristol: Westcare, The National Task Force on Chronic Fatigue Syndrome.
- (4849) Hartz A-J-AJ, Kuhn E-M-EM, Levine P-HPH. Characteristics of fatigued persons associated with features of chronic fatigue syndrome. *J Chronic Fatigue Syndr* 1998;4(3):71-97.
- (4950) Nacul LC, Lacerda EM, Pheby D, et al. Prevalence of myalgic encephalomyelitis/chronic fatigue syndrome (ME/CFS) in three regions of England: a repeated cross-sectional study in primary care. *BMC Med* 2011;9:91.
- (5051) Pheby D, Lacerda E, Nacul L, et al. A Disease Register for ME/CFS: Report of a Pilot Study. *BMC Res Notes* 2011;4:139.



- 1  
2  
3  
4  
5  
6  
7  
8  
9  
10  
11  
12  
13  
14  
15  
16  
17  
18  
19  
20  
21  
22  
23  
24  
25  
26  
27  
28  
29  
30  
31  
32  
33  
34  
35  
36  
37  
38  
39  
40  
41  
42  
43  
44  
45  
46  
47  
48  
49  
50  
51  
52  
53  
54  
55  
56  
57  
58  
59  
60
- (~~54~~52) Jason LA, Torres-Harding SR, Jurgens A, et al. Comparing the Fukuda et al. criteria and the Canadian case definition for chronic fatigue syndrome. *J Chronic Fatigue Syndr* 2004;12:2004-2052.
- (~~52~~ (53) [Brown AA, Jason LA, Evans MA, et al. Contrasting case definitions: The ME International Consensus Criteria vs. the Fukuda et al. CFS criteria. \*North American Journal of Psychology\* 2013;15:103-120.](#)
- (~~54~~) Wessely S, Chalder T, Hirsch S, et al. The prevalence and morbidity of chronic fatigue and chronic fatigue syndrome: a prospective primary care study. *Am J Public Health* 1997;87:1449-1455.
- (~~53~~55) Lindal E, Stefansson JG, Bergmann S. The prevalence of chronic fatigue syndrome in Iceland - a national comparison by gender drawing on four different criteria. *Nord J Psychiatry* 2002;56:273-277.
- (~~54~~56) Bates DW, Schmitt W, Buchwald D, et al. Prevalence of fatigue and chronic fatigue syndrome in a primary care practice. *Arch Intern Med* 1993;153:2759-2765.
- (~~55~~57) Kawakami N, Iwata N, Fujihara S, et al. Prevalence of chronic fatigue syndrome in a community population in Japan. *Tohoku J Exp Med* 1998;186:33-41.
- (~~56~~58) Lawrie SM, Pelosi AJ. Chronic fatigue syndrome in the community. Prevalence and associations. *Br J psychiatryPsychiatry* 1995;166:793-797.
- (~~57~~ (59) [Swanink CM, Vercoulen JH, Bleijenberg G, et al. Chronic fatigue syndrome: a clinical and laboratory study with a well matched control group. \*J Intern Med\* 1995;237:499-506.](#)
- (~~60~~) White PD, Goldsmith KA, Johnson AL, et al. Comparison of adaptive pacing therapy, cognitive behaviour therapy, graded exercise therapy, and specialist medical care for chronic fatigue syndrome (PACE): a randomised trial. *Lancet* 2011;377:823-836.
- (~~58~~61) Hamilton WT, Gallagher AM, Thomas JM, et al. The prognosis of different fatigue diagnostic labels: a longitudinal survey. *Fam Pract* 2005;22:383-388.
- (~~59~~62) Chalder T, Power MJ, Wessely S. Chronic fatigue in the community: 'a question of attribution'. *Psychol Med* 1996;26:791-800.
- (~~60~~63) Reeves WC, Wagner D, Nisenbaum R, et al. Chronic fatigue syndrome - A clinically empirical approach to its definition and study. *BMC Med* 2005;3:19.
- (~~61~~64) Reeves WC, Jones JF, Maloney E, et al. Prevalence of chronic fatigue syndrome in metropolitan, urban, and rural Georgia. *Popul Health Metr* 2007;5:5.

- 1  
2  
3  
4  
5  
6  
7  
8  
9  
10  
11  
12  
13  
14  
15  
16  
17  
18  
19  
20  
21  
22  
23  
24  
25  
26  
27  
28  
29  
30  
31  
32  
33  
34  
35  
36  
37  
38  
39  
40  
41  
42  
43  
44  
45  
46  
47  
48  
49  
50  
51  
52  
53  
54  
55  
56  
57  
58  
59  
60
- (6265) Jason LA, Najar N, Porter N, et al. Evaluating the Centers for Disease Control's empirical chronic fatigue syndrome case definition. *J Disabil Policy Stud* 2009;20:93-100.
- (6366) Twisk FN, Maes M. A review on cognitive behavioral therapy (CBT) and graded exercise therapy (GET) in myalgic encephalomyelitis (ME) / chronic fatigue syndrome (CFS): CBT/GET is not only ineffective and not evidence-based, but also potentially harmful for many patients with ME/CFS. *Neuro Endocrinol Lett* 2009;30:284-299.
- (6467) Mearin F, Lacy BE. Diagnostic criteria in IBS: useful or not? *Neurogastroenterol Motil* 2012;24:791-801.
- (6568) Pawlikowska T, Chalder T, Hirsch SR, et al. Population based study of fatigue and psychological distress. *BMJ* 1994;308:763-766.
- (6669) Brimacombe M, Helmer D, Natelson BH. Clinical differences exist between patients fulfilling the 1988 and 1994 case definitions of chronic fatigue syndrome. *J Clin Psychol Med S* 2002;9:309-314.
- (6770) Jason LA, Torres-Harding SR, Taylor RR, et al. A comparison of the 1988 and 1994 diagnostic criteria for chronic fatigue syndrome. *J Clin Psychol Med S* 2001;8:337-343.
- (6871) Jason LA, Skendrovic B, Furst J, et al. Data mining: comparing the empiric CFS to the Canadian ME/CFS case definition. *J Clin Psychol* 2012;68:41-49.
- (6972) Jason LA, Helgerson J, Torres-Harding SR, et al. Variability in diagnostic criteria for chronic fatigue syndrome may result in substantial differences in patterns of symptoms and disability. *Eval Health Prof* 2003;26:3-22.
- (7073) Wearden AJ, Dowrick C, Chew-Graham C, et al. Nurse led, home based self help treatment for patients in primary care with chronic fatigue syndrome: randomised controlled trial. *BMJ* 2010;340:c1777.
- (7174) Stubhaug B, Lie SA, Ursin H, et al. Cognitive-behavioural therapy v. mirtazapine for chronic fatigue and neurasthenia: randomised placebo-controlled trial. *Br J Psychiatry* 2008;192:217-223.
- (7275) Bazelmans E, Vercoulen JHMM, Swanink CMA, et al. Chronic Fatigue Syndrome and Primary Fibromyalgia Syndrome as recognized by GPs. *Fam Pract* 1999;16:602-604.
- (7376) Buchwald D, Umali P, Umali J, et al. Chronic fatigue and the chronic fatigue syndrome: Prevalence in a Pacific northwest health care system. *Ann Intern Med* 1995;123:15-88.
- (7477) Gunn WJ, Connell DB, Randall B. Epidemiology of chronic fatigue syndrome: the Centers for Disease Control Study. *Ciba Found Symp* 1993;173:83-93.

- 1  
2  
3  
4  
5  
6  
7  
8  
9  
10  
11  
12  
13  
14  
15  
16  
17  
18  
19  
20  
21  
22  
23  
24  
25  
26  
27  
28  
29  
30  
31  
32  
33  
34  
35  
36  
37  
38  
39  
40  
41  
42  
43  
44  
45  
46  
47  
48  
49  
50  
51  
52  
53  
54  
55  
56  
57  
58  
59  
60
- (7578) Price RK, North CS, Wessely S, et al. Estimating the prevalence of chronic fatigue syndrome and associated symptoms in the community. *Public Health Rep* 1992;107:514-522.
- (7679) Versluis RG, de Waal MW, Opmeer C, et al. Prevalence of chronic fatigue syndrome in 4 family practices in Leiden. *Ned Tijdschr Geneeskd* 1997;-141:1523-1526.
- ~~(77)~~ (80) Bierl C, Nisenbaum R, Hoaglin DC, et al. Regional distribution of fatiguing illnesses in the United States: a pilot study. *Popul Health Metr* 2004;2:1.
- (81) Cho HJ, Menezes PR, Hotopf M, et al. Comparative epidemiology of chronic fatigue syndrome in Brazilian and British primary care: Prevalence and recognition. *Br J psychiatry* *Psychiatry* 2009;194:117-122.
- ~~(78)~~ ~~Evengard~~ (82) Evengård B, Jacks A, Pedersen NL, et al. The epidemiology of chronic fatigue in the Swedish Twin Registry. *Psychol Med* 2005;35:1317-1326.
- (7983) Hamaguchi M, Kawahito Y, Takeda N, et al. Characteristics of chronic fatigue syndrome in a Japanese community population : chronic fatigue syndrome in Japan. *Clin Rheumatol* 2011;30:895-906.
- (8084) Jason LA, Richman JA, Rademaker AW, et al. A community-based study of chronic fatigue syndrome. *Arch Intern Med* 1999;159:2129-2137.
- (8185) Kim CH, Shin HC, Won CW. Prevalence of chronic fatigue and chronic fatigue syndrome in Korea: community-based primary care study. *J Korean Med Sci* 2005;20:529-534.
- (8286) Njoku MG, Jason LA, Torres-Harding SR. The prevalence of chronic fatigue syndrome in Nigeria. *J Health Psychol* 2007;12:461-474.
- (8387) Reyes M, Nisenbaum R, Hoaglin DC, et al. Prevalence and incidence of chronic fatigue syndrome in Wichita, Kansas. *Arch Intern Med* 2003;163:141530-1536.
- (8488) Steele L, Dobbins JG, Fukuda K, et al. The epidemiology of chronic fatigue in San Francisco. *Am J Med* 1998;105(3A):83S-90S.
- ~~(85)~~ ~~van't~~ (89) van't Leven M, Zielhuis GA, van der Meer JW, et al. Fatigue and chronic fatigue syndrome-like complaints in the general population. *Eur J Public Health* 2010;20:25251-257.
- ~~(86)~~ (90) Vincent A, Brimmer DJ, Whipple MO, et al. Prevalence, incidence, and classification of chronic fatigue syndrome in Olmsted County, Minnesota, as estimated using the Rochester epidemiology project. *Mayo Clin Proc* 2012;87:1145-1152.
- (91) Yiu YM, Qiu MY. A preliminary epidemiological study and discussion on traditional Chinese medicine pathogenesis of chronic fatigue syndrome in Hong Kong. *Zhong Xi Yi Jie He Xue Bao/Journal of Chinese Integrative Medicine* 2005;3:359-62362.

1  
2  
3  
4 | ([8792](#)) Ho-Yen DO, McNamara I. General practitioners' experience of the chronic fatigue syndrome.  
5 *Br J Gen Pract* 1991;41:324-326.  
6  
7  
8  
9  
10  
11  
12  
13  
14  
15  
16  
17  
18  
19  
20  
21  
22  
23  
24  
25  
26  
27  
28  
29  
30  
31  
32  
33  
34  
35  
36  
37  
38  
39  
40  
41  
42  
43  
44  
45  
46  
47  
48  
49  
50  
51  
52  
53  
54  
55  
56  
57  
58  
59  
60

**Table 1**  
**Case definitions for CFS/ME**

| CASE DEFINITIONS<br>(chronologically)                                | Developed from other<br>criteria or definitions? | INSTITUTION AND COUNTRY OF FIRST AUTHOR                                                                               | CITATIONS <sup>A</sup><br>ISI/Google Scholar |
|----------------------------------------------------------------------|--------------------------------------------------|-----------------------------------------------------------------------------------------------------------------------|----------------------------------------------|
| CDC-1988/Holmes <sup>20</sup>                                        |                                                  | Centers for Disease Control, Atlanta, USA                                                                             | 1106/1542                                    |
| Myalgic encephalomyelitis 1988/ <a href="#">Ramsey</a> <sup>42</sup> |                                                  | Royal Free Hospital, London, UK                                                                                       | 6/51                                         |
| London-1990/Dowsett <sup>3637</sup>                                  |                                                  | Royal Free Hospital, London, UK                                                                                       | 55/88                                        |
| Australian-1990 <sup>4344</sup>                                      |                                                  | The Prince Henry Hospital, Little Bay, Australia                                                                      | 230/343                                      |
| Post-viral fatigue syndrome-1990 <sup>4243</sup>                     |                                                  | <del>Raigmore Hospital</del> <a href="#">Raigmore Hospital</a> , Inverness, UK                                        | 14/28                                        |
| Oxford-1991 <sup>3940</sup>                                          |                                                  | University of Oxford, Oxford, UK                                                                                      | 476/667                                      |
| London ME-1994/National Task Force Guidelines<br><sup>4748</sup>     |                                                  | National Task Force, Bristol, UK                                                                                      | no records                                   |
| CDC-1994/Fukuda <sup>3839</sup>                                      | CDC-1988                                         | Centers for Disease Control, Atlanta, USA                                                                             | 1860/3006                                    |
| Working Case Definition-1996 <sup>3738</sup>                         | CDC-1988                                         | Brigham and Women's <del>Hospital</del> <a href="#">Massachusetts Hospital</a><br><a href="#">Massachusetts</a> , USA | 78/138                                       |
| Chronic Fatigue Syndrome-1998 <sup>4849</sup>                        | CDC-1994                                         | Medical College of Wisconsin, USA                                                                                     | 8/23                                         |
| Canadian-2003 <sup>2422</sup>                                        |                                                  | <del>Royal College</del> <a href="#">Royal College</a> of Physicians and Surgeons of<br>Canada, Canada                | 69/233                                       |
| Empirical CDC-2005/Reeves <sup>6063</sup>                            | CDC-1994                                         | Centers for Disease Control and Prevention, Atlanta, USA                                                              | 73/154                                       |
| Empirical-2007 <sup>4041</sup>                                       |                                                  | <del>DePaul University</del> <a href="#">DePaul University</a> , Chicago, USA                                         | 5/14                                         |
| Brighton Collaboration-2007 <sup>3435</sup>                          |                                                  | Centers for Disease Control and Prevention, Atlanta, USA                                                              | 1/5                                          |
| NICE-2007 Guidelines <sup>4546</sup>                                 |                                                  | National Institute for Health and Clinical Excellence, London, UK                                                     | no records/23 <sup>B</sup>                   |
| The Nightingale Definition of ME/Hyde-2007 <sup>4445</sup>           |                                                  | The Nightingale Research Foundation, Canada                                                                           | no records/5                                 |
| Epidemiological CFS/ME Definition-2008 <sup>3334</sup>               |                                                  | Southampton, Hampshire, UK                                                                                            | 2/4                                          |
| Revised Canadian-2010 <sup>4647</sup>                                | CDC-1994, Empirical CDC-<br>2005, Canadian-2003  | DePaul University, Illinois, USA                                                                                      | 8/18                                         |
| ICC-2011 <sup>2223</sup>                                             | Canadian-2003                                    | Independent, Canada                                                                                                   | 4/16                                         |
| ME-2011 <sup>3233</sup>                                              | Dowsett, Ramsey, Hyde                            | DePaul University, Illinois, USA                                                                                      | 1/1                                          |

<sup>A</sup>Searched 23. May 2012 <sup>B</sup>Summary of the NICE Guidelines in: *Diagnosis and management of chronic fatigue syndrome or myalgic encephalomyelitis (or encephalopathy)*:

1  
2  
3  
4  
5  
6  
7  
8  
9  
10  
11  
12  
13  
14  
15  
16  
17  
18  
19  
20  
21  
22  
23  
24  
25  
26  
27  
28  
29  
30  
31  
32  
33  
34  
35  
36  
37  
38  
39  
40  
41  
42  
43  
44  
45  
46  
47  
48  
49

| CASE DEFINITIONS<br>(chronologically)             | Developed from other<br>criteria or definitions? | INSTITUTION AND COUNTRY OF FIRST AUTHOR | CITATIONS <sup>A</sup><br>ISI/Google Scholar |
|---------------------------------------------------|--------------------------------------------------|-----------------------------------------|----------------------------------------------|
| <i>summary of NICE guidance BMJ 2007; 335:446</i> |                                                  |                                         |                                              |

For peer review only

Table 2

**Studies presenting prevalence estimates\* by independent application of several case definitions on the same population (Model A)**

| First author, year, country               | Data collection                                                                                                                                                                                                                                                        | Prevalence (95 % CI)                                                                                        |
|-------------------------------------------|------------------------------------------------------------------------------------------------------------------------------------------------------------------------------------------------------------------------------------------------------------------------|-------------------------------------------------------------------------------------------------------------|
| Nacul <sup>4950</sup><br>2011, UK         | 609 possible cases electronically identified in databases of 29 GP practices. 70 excluded after clinical revision (explained fatigue), 135 refusals and 126 non-cases.                                                                                                 | ECD: 0.03 % (0.02-0.04)<br>Canada: 0.10 % (0.09-0.12)<br>Fukuda: 0.19 % (0.17-0.21)                         |
| Bates <sup>5456</sup><br>1993, US         | 995 consecutive GP visitors invited - 94 % screened by a questionnaire to detect major fatigue. Selected patients further evaluated by questionnaires, physical examinations and interviews.                                                                           | Holmes: 0.3 % (0.1-0.9)<br>Oxford: 0.4 % (0.1 -1.1)<br>Australia: 1.1 % (0.5-2.0)                           |
| Kawakami <sup>5557</sup><br>1998, Japan   | All adults (n=508) in Town A, Kofu-city, were invited to participate in this structured psychiatric diagnostic interview survey. 137 (27%) completed the study                                                                                                         | Holmes: 0.0 % (0.0-2.7)<br>Fukuda: 1.5 % (0.2-5.2)<br>Oxford: 1.5 % (0.2-5.2)                               |
| Lindal <sup>5355</sup><br>2002, Iceland   | Survey sent to 4000 randomly selected adult participants – 63% responded. Questionnaire included questions on all items in the four case definitions. Diagnosis were set electronically based on received responses. No medical tests or examinations were undertaken. | Holmes 0.0 % (0.0-1.5)<br>Fukuda: 2.1 % (1.6-2.8)<br>Oxford: 3.7 % (3.2-4.6)<br>Australia: 7.6 % (6.6-8.7)  |
| Wessely <sup>52;6554;68</sup><br>1997, UK | 2363 patients followed in a cohort study – 84% completed. Fatigued participant subjected to detailed questionnaires, interviews, and laboratory testing. Separate estimates reported for inclusion/exclusion of psychiatric co-morbidity.                              | Holmes: 1.2 % (0.5-1.8)<br>Australia: 1.4 % (0.8-2.0)<br>Oxford: 2.2 % (1.4-3.0)<br>Fukuda: 2.6 % (1.7-3.4) |

\*Prevalence estimates were calculated with the number of responders in the denominator. The choice of denominator may have large implications with regard to the subsequent prevalence estimate, particularly in studies with low response rate. Hence, depending on the actual response rate, estimates presented for each study may be biased.

Table 3

Conformity of prevalence estimates in studies where patients diagnosed with CFS/ME with one set of diagnostic criteria are diagnosed sequentially with other case definitions (Model B)

| Study Recruitment                                                                 | Case definitions                                                   | Conformity <sup>#</sup> (95% CI)                                                          | Symptom and burden profile                                                                                                                                                                                                                       |
|-----------------------------------------------------------------------------------|--------------------------------------------------------------------|-------------------------------------------------------------------------------------------|--------------------------------------------------------------------------------------------------------------------------------------------------------------------------------------------------------------------------------------------------|
| <b>Brimacombe</b> <sup>69</sup> , US<br>Fukuda-positive from register             | Fukuda* (n=200)<br>Holmes (n=171)                                  | 1<br>0.85 (0.80-0.90)                                                                     | [F+/H-] patients do not endorse infectious-type symptoms as often or to the same degree of severity as [F+/H+] patients                                                                                                                          |
| <b>Jason</b> <sup>70</sup> , US<br>Fukuda-positive from register                  | Fukuda* (n=32)<br>Holmes (n=14)                                    | 1<br>0.44 (0.26-0.62)                                                                     | [F+/H+] patients with more symptoms and functional impairment than [F+/H-]. No difference in psychological co-morbidity                                                                                                                          |
| <b>Jason</b> <sup>52</sup> , US<br>Fukuda-positive from register                  | Fukuda* (n=32)<br>Canada (n=23) <sup>§</sup>                       | 1<br>0.63 (0.44-0.79)                                                                     | C+ patients have less psychiatric co-morbidity, more physical function impairment, are more fatigued with more neurological symptoms than [F+/C-] patients                                                                                       |
| <b>Jason</b> <sup>33</sup> , US<br>Fukuda-positive recruited from many sources    | Fukuda* (n= <del>114</del> 113)<br>Canada (n=57)<br>ME-2011 (n=27) | 1<br>0.50 (0.41-0.60)<br>0.24 (0.16-0.33)                                                 | [F+/C+] patients had more functional impairments, and physical, mental, and cognitive problems than [F+/C-] patients. [F+/ME+] patients had more functional impairments, and more severe physical and cognitive symptoms than [F+/ME-] patients. |
| <b>Fluge</b> <sup>9</sup> , Norway<br>Fukuda-positive patients recruited to trial | Fukuda* (n=30)<br>Canada (n=28)                                    | 1<br>0.93 (0.78-0.99)                                                                     | Not reported                                                                                                                                                                                                                                     |
| <b>Jason</b> <sup>71</sup> , US<br>Register                                       | Fukuda* (n=24)<br>Reeves empirical<br>Canada                       | Of 24 F+ and 84 F- patients empirical criteria and Canada identified 79 and 87% correctly | Canada-2003 case definition appear to select more cardinal and central features of the illness than Empirical CDC-2005/Reeves case definition                                                                                                    |
| <b>Jason</b> <sup>65</sup> , US<br>Register                                       | Fukuda* (n=27)<br>Reeves emp. (n=41) <sup>§§</sup>                 | 1<br>1.00 (0.87-1.00)                                                                     | Empirical CDC-2005/Reeves case <del>definition led</del> <u>definition led</u> to misclassification of major depressive disorder as CFS                                                                                                          |



|                                                                                                    |                                                                            |                                           |                                                                                                                                                                                                |
|----------------------------------------------------------------------------------------------------|----------------------------------------------------------------------------|-------------------------------------------|------------------------------------------------------------------------------------------------------------------------------------------------------------------------------------------------|
| <u><b>Brown</b></u> <sup>53</sup> , US<br>Fukuda-positive recruited from many sources              | Fukuda* (n=113)<br>ICC (n=39)                                              | 1<br>0.35 (0.26-0.44)                     | <u>ICC+ patients with more functional impairments and physical, mental and cognitive problems than [F+/ICC-] patients. The ICC+ patients also had greater rates of psychiatric comorbidity</u> |
| <u><b>Jason</b></u> <sup>72</sup> , US<br>Fukuda-positive from register                            | Fukuda* (n=32)<br>Dowsett (n=17) <sup>§§§</sup>                            | 1<br>0.44 (0.26-0.62)                     | D+ patients appear to be more symptomatic than [F+/D-] patients, especially in the neurological and neuropsychiatric areas.                                                                    |
| <u><b>White</b></u> <sup>60</sup> , UK<br>Oxford-positive patients recruited to trial              | Oxford* (n=641)<br>Fukuda (n=427)<br><del>LondonME</del> London ME (n=329) | 1<br>0.67 (0.63-0.70)<br>0.51 (0.47-0.55) | Effect of CBT and GET similar regardless of diagnostic group affiliation                                                                                                                       |
| <u><b>Wearden</b></u> <sup>73</sup> , UK<br>Oxford-positive patients recruited to trial            | Oxford* (n=296)<br><del>LondonME</del> London ME (n=92)                    | 1<br>0.31 (0.26-0.37)                     | Not reported                                                                                                                                                                                   |
| <u><b>Stubhaug</b></u> <sup>74</sup> , Norway<br>Neurasthenia-positive patients recruited to trial | Neurasthenia* (n=72)<br>Oxford (n=65)<br>Fukuda (n=29)                     | 1<br>0.90 (0.81-0.96)<br>0.40 (0.29-0.53) | Not reported                                                                                                                                                                                   |

\*The proportion of cases relative to the evaluation standard; \*Evaluation standard;  
 § 3/23 participants testing positive according to Canada were negative according to Fukuda  
 §§ 14/37 depressed patients tested positive according to Reeves and negative on Fukuda  
 §§§ 3/17 participants testing positive according to Dowsett were negative according to Fukuda

Pre-view only

Table 4

### Studies presenting prevalence estimates for CFS/ME from several case definitions applied on different populations (Model C)

| First author, year<br>COUNTRY                       | CASE<br>DEFINITION          | RECRUITMENT STRATEGY                                                                             |
|-----------------------------------------------------|-----------------------------|--------------------------------------------------------------------------------------------------|
| Bazelmans 1999 <sup>7275</sup><br>The Netherlands   | As recognized by<br>GP      | Questionnaire to all GPs,<br>Prevalence estimated to 0.11 %                                      |
| Lloyd 1990 <sup>4344</sup><br>Australia             | Australian                  | Recruited through GP's covering 76206 patients                                                   |
| Buchwald 1995 <sup>7376</sup><br>US                 | CDC-1988/<br>Holmes         | Postal survey to 4000 randomly selected participants                                             |
| Gunn 1993 <sup>7477</sup><br>US                     | CDC-1988/<br>Holmes         | Recruited by contact with primary health care providers;<br>prevalence in the range 0.002-0.007% |
| Price 1992 <sup>7578</sup><br>USA                   | CDC-1988/<br>Holmes         | Interview survey with 13538 participants                                                         |
| Versluis 1997 <sup>79</sup><br>The Netherlands      | CDC-1988/<br>Holmes         | 23000 patients in GP database                                                                    |
| Bierl 2004 <sup>80</sup><br>US                      | CDC-1994/<br>Fukuda         | Random digit-dialing survey with 7317 respondent                                                 |
| Cho 2009 <sup>7781</sup><br>UK                      | CDC-1994/<br>Fukuda         | 2530 consecutive GP visitors                                                                     |
| Cho 2009 <sup>7781</sup><br>Brazil                  | CDC-1994/<br>Fukuda         | 3921 consecutive GP visitors                                                                     |
| Evengård 2005 <sup>7882</sup><br>Sweden             | CDC-1994/<br>Fukuda         | Phone survey of 41499 participants in a twin register                                            |
| Hamaguchi 2011 <sup>7983</sup><br>Japan             | CDC-1994/<br>Fukuda         | 3000 random participants in a health check program                                               |
| Jason 1999 <sup>8084</sup><br>US                    | CDC-1994/<br>Fukuda         | Phone survey with 18675 respondents                                                              |
| Kim 2005 <sup>85</sup><br>South Korea               | CDC-1994/<br>Fukuda         | 1962 consecutive GP visitors                                                                     |
| Njoku 2007 <sup>8286</sup><br>Nigeria               | CDC-1994/<br>Fukuda         | Interview survey with 1500 participants                                                          |
| Reeves 2007 <sup>6464</sup><br>US                   | CDC-1994/<br>empirical      | Phone survey with 10837 responding households                                                    |
| Reyes 2003 <sup>8387</sup><br>US                    | CDC-1994/<br>Fukuda         | Phone survey with 33997 responding households                                                    |
| Steele 1998 <sup>8488</sup><br>US                   | CDC-1994/<br>Fukuda         | Phone survey with 8004 responding households                                                     |
| van't Leven 2009 <sup>8589</sup><br>The Netherlands | CDC-1994/<br>Fukuda         | Postal survey to 22500 randomly selected participants                                            |
| <u>Vincent 2012 <sup>90</sup><br/>US</u>            | <u>CDC-1994/<br/>Fukuda</u> | <u>Retrospective medical record review in Olmsted County;<br/>183841 residents</u>               |
| Yiu 2005 <sup>8691</sup><br>China                   | CDC-1994/<br>Fukuda         | Unknown                                                                                          |
| Lawrie 1995 <sup>6658</sup><br>UK                   | Oxford                      | Postal survey to 1039 randomly selected participants                                             |

1  
2  
3  
4  
5  
6  
7  
8  
9  
10  
11  
12  
13  
14  
15  
16  
17  
18  
19  
20  
21  
22  
23  
24  
25  
26  
27  
28  
29  
30  
31  
32  
33  
34  
35  
36  
37  
38  
39  
40  
41  
42  
43  
44  
45  
46  
47  
48  
49  
50  
51  
52  
53  
54  
55  
56  
57  
58  
59  
60

| Ho-Yen ~~1994~~<sup>87</sup> 1991<sup>92</sup>  
UK  
|

Post viral  
exhaustion  
syndrome

Postal survey to 195 GPs; prevalence 0.13 % (0.12-0.15)

For peer review only

## Figure legends

### Figure 1

Model A: Evaluation design with independent application of several case definitions on the same background population

### Figure 2

Model B: Evaluation design where different case definitions with assumed increasing specificity are applied sequentially on the same population

### Figure 3

Model C: Evaluation design with indirect comparisons of prevalence estimates from several case definitions applied on different populations

### Figure 4

Flow chart summarising the selection process

### Figure 5

Forest plot summarising indirect comparisons of prevalence estimates from different case definitions with the CDC 1994/Fukuda criteria (Model C). Studies presenting point prevalence weighted for non-response are asterisked (\*)

1  
2  
3  
4  
5  
6  
7  
8  
9  
10  
11  
12  
13  
14  
15  
16  
17  
18  
19  
20  
21  
22  
23  
24  
25  
26  
27  
28  
29  
30  
31  
32  
33  
34  
35  
36  
37  
38  
39  
40  
41  
42  
43  
44  
45  
46  
47  
48  
49  
50  
51  
52  
53  
54  
55  
56  
57  
58  
59  
60

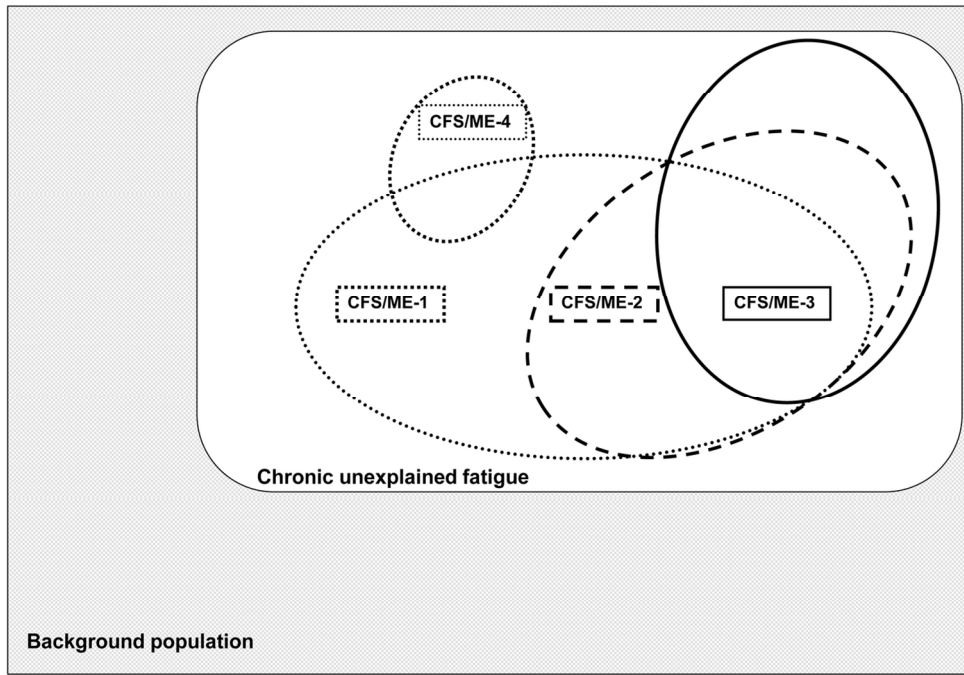

Model A: Evaluation design with independent application of several case definitions on the same background population  
123x87mm (300 x 300 DPI)

ew only

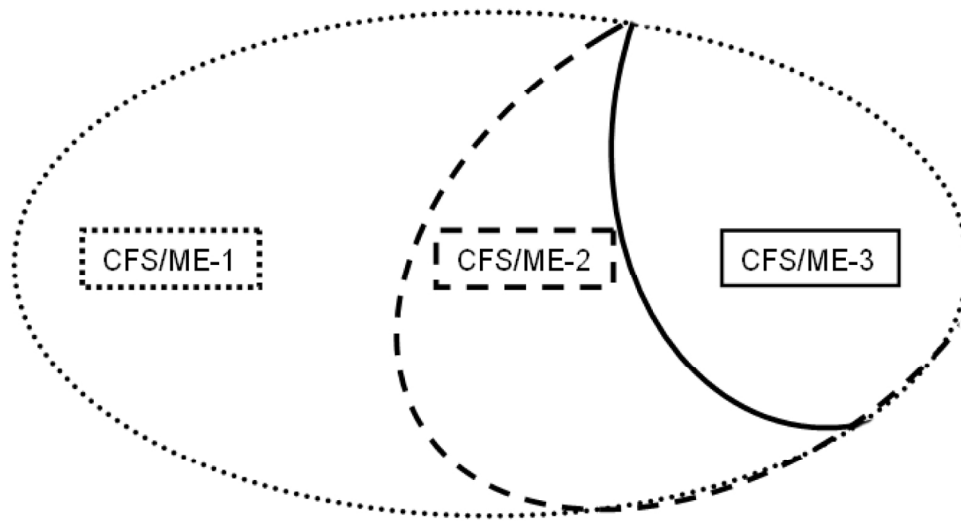

Model B: Evaluation design where different case definitions with assumed increasing specificity are applied sequentially on the same population  
139x77mm (300 x 300 DPI)

review only

1  
2  
3  
4  
5  
6  
7  
8  
9  
10  
11  
12  
13  
14  
15  
16  
17  
18  
19  
20  
21  
22  
23  
24  
25  
26  
27  
28  
29  
30  
31  
32  
33  
34  
35  
36  
37  
38  
39  
40  
41  
42  
43  
44  
45  
46  
47  
48  
49  
50  
51  
52  
53  
54  
55  
56  
57  
58  
59  
60



Model C: Evaluation design with indirect comparisons of prevalence estimates from several case definitions applied on different populations  
145x185mm (300 x 300 DPI)

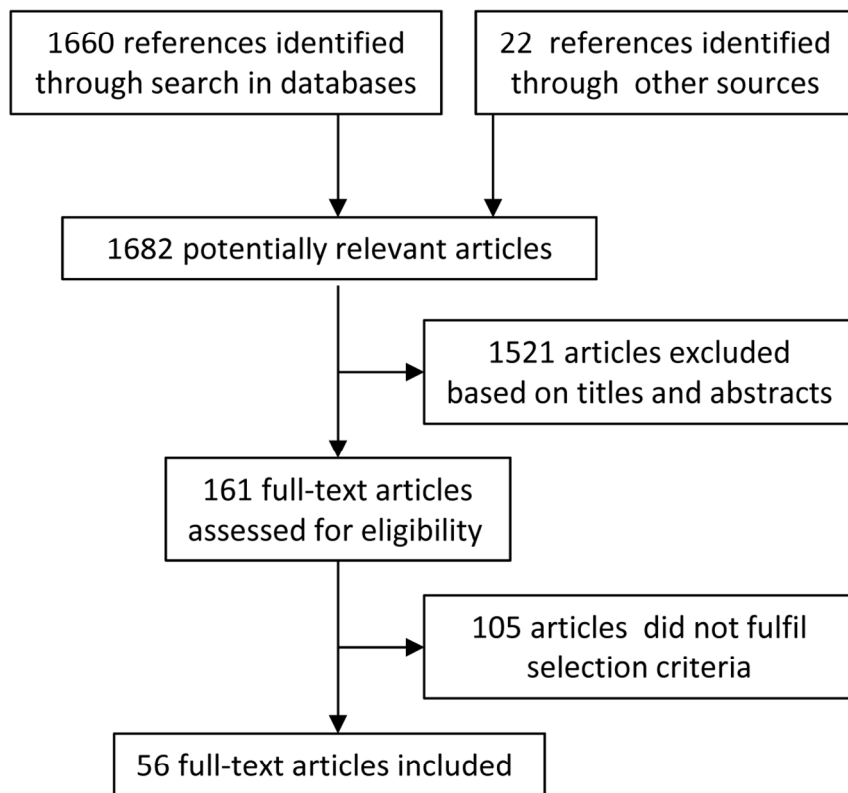

Flow chart summarising the selection process  
116x108mm (300 x 300 DPI)

only

1  
2  
3  
4  
5  
6  
7  
8  
9  
10  
11  
12  
13  
14  
15  
16  
17  
18  
19  
20  
21  
22  
23  
24  
25  
26  
27  
28  
29  
30  
31  
32  
33  
34  
35  
36  
37  
38  
39  
40  
41  
42  
43  
44  
45  
46  
47  
48  
49  
50  
51  
52  
53  
54  
55  
56  
57  
58  
59  
60



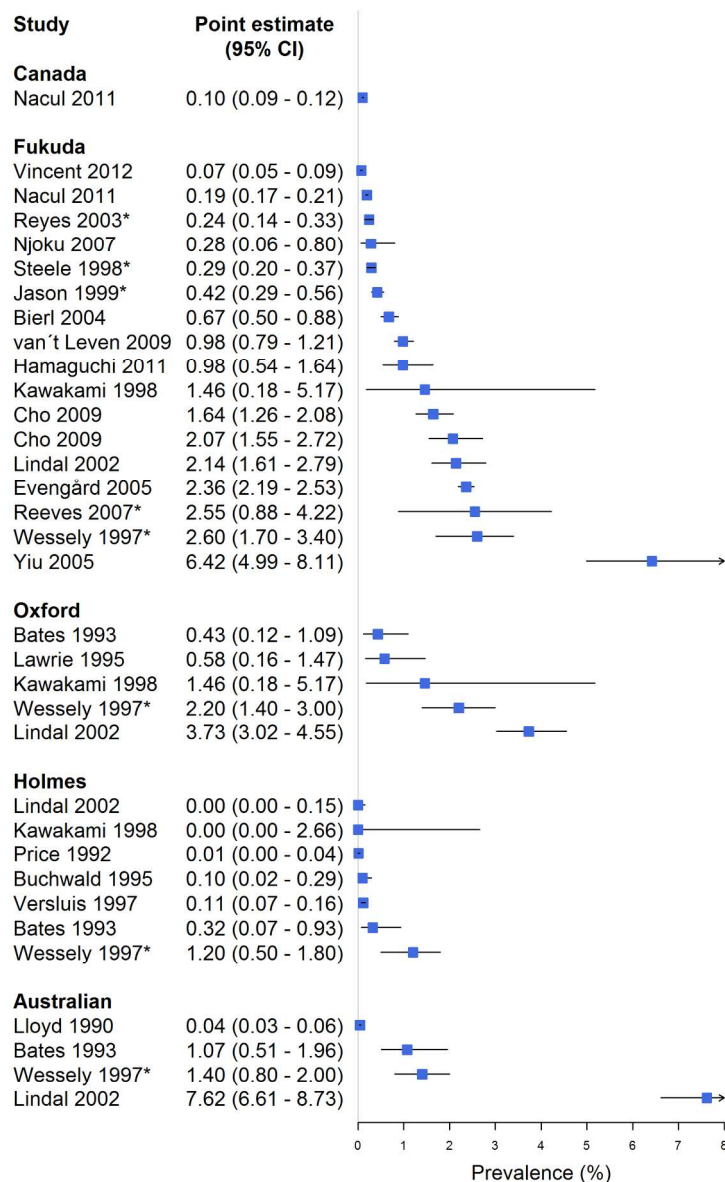

Forest plot summarising indirect comparisons of prevalence estimates from different case definitions (Model C). Studies presenting point prevalence weighted for non-response are asterisked (\*)  
233x320mm (300 x 300 DPI)

## Appendix 1

### Search strategy CFS/ME Case Definitions

**Total search hits: 2259 after the last update**

**Search hits after duplet removal: 1660 after the last update**

**AMED, EMBASE, MEDLINE, PsycINFO**

Searched 25. November 2013

Total search hits: 1736

All the sources were search in Ovid simultaneously

**Ovid AMED** from 1985; 171 hits

**Ovid EMBASE** from 1980; 926 hits

**Ovid MEDLINE** In-Process & Other Non-Indexed Citations and Ovid MEDLINE from 1946; 381 hits

**Ovid PsycINFO** from 1887; 258 hits

1. Fatigue Syndrome, Chronic/
2. (chronic fatigue\* or fatigue syndrome\* or infectious mononucleos\* or postviral fatigue syndrome\* or myalgic encephalo\* or CFIDS or CFS\* or (chronic adj4 mononucleos\*) or post infectious encephalo\* or PVFS).tw.
3. 1 or 2
4. "diagnostic techniques and procedures"/
5. guideline/ or practice guideline/
6. (diagnostic procedure\* or diagnostic technique\* or diagnostic criteria or diagnostic definition or clinical definition or consensus definition or consensus criteria or case definition or clinical Guideline or clinical recommendation or clinical assessment or diagnostics).tw.
7. 4 or 5 or 6
8. 3 and 7
9. 8 use prnz
10. chronic fatigue syndrome/
11. (chronic fatigue\* or fatigue syndrome\* or infectious mononucleos\* or postviral fatigue syndrome\* or myalgic encephalo\* or CFIDS or CFS\* or (chronic adj4 mononucleos\*) or post infectious encephalo\* or PVFS).tw.
12. 10 or 11
13. diagnostic procedure/ or diagnostic test/ or physical examination/
14. (diagnostic procedure\* or diagnostic technique\* or diagnostic criteria or diagnostic definition or clinical definition or consensus definition or consensus criteria or case definition or clinical Guideline or clinical recommendation or clinical assessment or diagnostics).tw.
15. 13 or 14
16. 12 and 15
17. 16 use emez

18. fatigue syndrome chronic/
19. (chronic fatigue\* or fatigue syndrome\* or infectious mononucleos\* or postviral fatigue syndrome\* or myalgic encephalo\* or CFIDS or CFS\* or (chronic adj4 mononucleos\*) or post infectious encephalo\* or PVFS).tw.
20. 18 or 19
21. "diagnostic techniques and procedures"/ or patient assessment/ or physical examination/
22. (diagnostic procedure\* or diagnostic technique\* or diagnostic criteria or diagnostic definition or clinical definition or consensus definition or consensus criteria or case definition or clinical Guideline or clinical recommendation or clinical assessment or diagnostics).tw.
23. 21 or 22
24. 20 and 23
25. 24 use amed
26. exp Chronic Fatigue Syndrome/
27. (chronic fatigue\* or fatigue syndrome\* or infectious mononucleos\* or postviral fatigue syndrome\* or myalgic encephalo\* or CFIDS or CFS\* or (chronic adj4 mononucleos\*) or post infectious encephalo\* or PVFS).tw.
28. 26 or 27
29. medical diagnosis/ or diagnosis/ or physical examination/
30. (diagnostic procedure\* or diagnostic technique\* or diagnostic criteria or diagnostic definition or clinical definition or consensus definition or consensus criteria or case definition or clinical Guideline or clinical recommendation or clinical assessment or diagnostics).tw.
31. 29 or 30
32. 28 and 31
33. 32 use psyf
34. 9 or 17 or 25 or 33
35. remove duplicates from 34

### **Cochrane Library**

Searched 25. November 2013 back to 1898

Total search hits: 473

#1 (chronic fatigue\* or fatigue syndrome\* or infectious mononucleos\* or postviral fatigue syndrome\* or myalgic encephalo\* or CFIDS or CFS\* or post infectious encephalo\* or PVFS) .tw.

#2 (diagnostic procedure\* or diagnostic technique\* or diagnostic criteria or diagnostic definition or clinical definition or consensus definition or consensus criteria or case definition or clinical Guideline or clinical recommendation or clinical assessment or diagnostics) .tw.

#3 MeSH descriptor: [Fatigue Syndrome, Chronic] explode all trees

#4 #1 or #3

#5 #2 and #4

**CINAHL**

Searched 25. November 2013 back to 1981

Total search hits: 27

- S6 S3 and S4 Limiters - Exclude MEDLINE records
- S5 S3 and S4
- S4 S1 or S2
- S3 TI (diagnostic procedure\* or diagnostic technique\* or diagnostic criteria or diagnostic definition or clinical definition or consensus definition or consensus criteria or case definition or clinical Guideline or clinical recommendation or clinical assessment or diagnostics) OR AB (diagnostic procedure\* or diagnostic technique\* or diagnostic criteria or diagnostic definition or clinical definition or consensus definition or consensus criteria or case definition or clinical Guideline or clinical recommendation or clinical assessment or diagnostics)
- S2 TI (chronic fatigue\* or fatigue syndrome\* or infectious mononucleos\* or postviral fatigue syndrome\* or myalgic encephalo\* or CFIDS or CFS\* or post infectious encephalo\* or PVFS ) OR AB ( chronic fatigue\* or fatigue syndrome\* or infectious mononucleos\* or postviral fatigue syndrome\* or myalgic encephalo\* or CFIDS or CFS\* or post infectious encephalo\* or PVFS)
- S1 (MH "Fatigue Syndrome, Chronic")

**PEdro**

Search 25. November 2013 back to 1929

Total search hits: 23

Search phrases and words: chronic fatigue syndrome and diagnos\*



# PRISMA 2009 Checklist

| Section/topic                      | #  | Checklist item                                                                                                                                                                                                                                                                                              | Reported on page # |
|------------------------------------|----|-------------------------------------------------------------------------------------------------------------------------------------------------------------------------------------------------------------------------------------------------------------------------------------------------------------|--------------------|
| <b>TITLE</b>                       |    |                                                                                                                                                                                                                                                                                                             |                    |
| Title                              | 1  | Identify the report as a systematic review, meta-analysis, or both.                                                                                                                                                                                                                                         | 1,2                |
| <b>ABSTRACT</b>                    |    |                                                                                                                                                                                                                                                                                                             |                    |
| Structured summary                 | 2  | Provide a structured summary including, as applicable: background; objectives; data sources; study eligibility criteria, participants, and interventions; study appraisal and synthesis methods; results; limitations; conclusions and implications of key findings; systematic review registration number. | 2, 3               |
| <b>INTRODUCTION</b>                |    |                                                                                                                                                                                                                                                                                                             |                    |
| Rationale                          | 3  | Describe the rationale for the review in the context of what is already known.                                                                                                                                                                                                                              | 5, 6               |
| Objectives                         | 4  | Provide an explicit statement of questions being addressed with reference to participants, interventions, comparisons, outcomes, and study design (PICOS).                                                                                                                                                  | 6                  |
| <b>METHODS</b>                     |    |                                                                                                                                                                                                                                                                                                             |                    |
| Protocol and registration          | 5  | Indicate if a review protocol exists, if and where it can be accessed (e.g., Web address), and, if available, provide registration information including registration number.                                                                                                                               | 6                  |
| Eligibility criteria               | 6  | Specify study characteristics (e.g., PICOS, length of follow-up) and report characteristics (e.g., years considered, language, publication status) used as criteria for eligibility, giving rationale.                                                                                                      | 6                  |
| Information sources                | 7  | Describe all information sources (e.g., databases with dates of coverage, contact with study authors to identify additional studies) in the search and date last searched.                                                                                                                                  | 6                  |
| Search                             | 8  | Present full electronic search strategy for at least one database, including any limits used, such that it could be repeated.                                                                                                                                                                               | 6                  |
| Study selection                    | 9  | State the process for selecting studies (i.e., screening, eligibility, included in systematic review, and, if applicable, included in the meta-analysis).                                                                                                                                                   | 7                  |
| Data collection process            | 10 | Describe method of data extraction from reports (e.g., piloted forms, independently, in duplicate) and any processes for obtaining and confirming data from investigators.                                                                                                                                  | 7                  |
| Data items                         | 11 | List and define all variables for which data were sought (e.g., PICOS, funding sources) and any assumptions and simplifications made.                                                                                                                                                                       | 7                  |
| Risk of bias in individual studies | 12 | Describe methods used for assessing risk of bias of individual studies (including specification of whether this was done at the study or outcome level), and how this information is to be used in any data synthesis.                                                                                      | 8                  |
| Summary measures                   | 13 | State the principal summary measures (e.g., risk ratio, difference in means).                                                                                                                                                                                                                               | NA                 |
| Synthesis of results               | 14 | Describe the methods of handling data and combining results of studies, if done, including measures of consistency (e.g., $I^2$ for each meta-analysis)                                                                                                                                                     | 8                  |

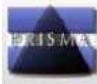

# PRISMA 2009 Checklist

Page 1 of 2

| Section/topic                 | #  | Checklist item                                                                                                                                                                                           | Reported on page # |
|-------------------------------|----|----------------------------------------------------------------------------------------------------------------------------------------------------------------------------------------------------------|--------------------|
| Risk of bias across studies   | 15 | Specify any assessment of risk of bias that may affect the cumulative evidence (e.g., publication bias, selective reporting within studies).                                                             | 7                  |
| Additional analyses           | 16 | Describe methods of additional analyses (e.g., sensitivity or subgroup analyses, meta-regression), if done, indicating which were pre-specified.                                                         | NA                 |
| <b>RESULTS</b>                |    |                                                                                                                                                                                                          |                    |
| Study selection               | 17 | Give numbers of studies screened, assessed for eligibility, and included in the review, with reasons for exclusions at each stage, ideally with a flow diagram.                                          | 8,9                |
| Study characteristics         | 18 | For each study, present characteristics for which data were extracted (e.g., study size, PICOS, follow-up period) and provide the citations.                                                             | Table 1-4          |
| Risk of bias within studies   | 19 | Present data on risk of bias of each study and, if available, any outcome level assessment (see item 12).                                                                                                | NA                 |
| Results of individual studies | 20 | For all outcomes considered (benefits or harms), present, for each study: (a) simple summary data for each intervention group (b) effect estimates and confidence intervals, ideally with a forest plot. | Table 2-4, Fig 5   |
| Synthesis of results          | 21 | Present results of each meta-analysis done, including confidence intervals and measures of consistency.                                                                                                  | NA                 |
| Risk of bias across studies   | 22 | Present results of any assessment of risk of bias across studies (see Item 15).                                                                                                                          | 9,10,11            |
| Additional analysis           | 23 | Give results of additional analyses, if done (e.g., sensitivity or subgroup analyses, meta-regression [see Item 16]).                                                                                    | NA                 |
| <b>DISCUSSION</b>             |    |                                                                                                                                                                                                          |                    |
| Summary of evidence           | 24 | Summarize the main findings including the strength of evidence for each main outcome; consider their relevance to key groups (e.g., healthcare providers, users, and policy makers).                     | 11,12              |
| Limitations                   | 25 | Discuss limitations at study and outcome level (e.g., risk of bias), and at review-level (e.g., incomplete retrieval of identified research, reporting bias).                                            | 12                 |
| Conclusions                   | 26 | Provide a general interpretation of the results in the context of other evidence, and implications for future research.                                                                                  | 16,17              |
| <b>FUNDING</b>                |    |                                                                                                                                                                                                          |                    |
| Funding                       | 27 | Describe sources of funding for the systematic review and other support (e.g., supply of data); role of funders for the systematic review.                                                               | 17                 |

From: Moher D, Liberati A, Tetzlaff J, Altman DG, The PRISMA Group (2009). Preferred Reporting Items for Systematic Reviews and Meta-Analyses: The PRISMA Statement. PLoS Med 6(6): e1000097. doi:10.1371/journal.pmed1000097

For more information, visit: [www.prisma-statement.org](http://www.prisma-statement.org).

For peer review only - <http://bmjopen.bmj.com/site/about/guidelines.xhtml>
